# Supplementary material
Source: publisher figshare collection journal article supplement (https://acs.figshare.com/ndownloader/files/21740196)
Supplement: Supplementary file 1 [file 21740196]

## Sheet: Cover Page
Supporting Information Applicability Domains Enhance Application of PPARγ Agonist Classifiers Trained by Drug-like Compounds to Environmental Chemicals Zhongyu Wang,† Jingwen Chen,*,† Huixiao Hong‡ †Key Laboratory of Industrial Ecology and Environmental Engineering (MOE), School of Environmental Science and Technology, Dalian University of Technology, Dalian 116024, China. ‡National Center for To…

## Sheet: Table S1
Table S1. Final ChEMBL data set
Molecule ChEMBL ID	Standard Type	Standard Relation	Standard Value	Standard Units	Comment	Assay Type	Reference Compound	Reference Value	Assay Cell Type
CHEMBL248530	IC50	'='	2300	nM		binding	fluorescein labeled ligand
CHEMBL396696	IC50	'='	1210	nM		binding	fluorescein labeled ligand
CHEMBL246473	IC50	'='	134	nM		binding	fluorescein labeled ligand
CHEMBL247926	IC50	'='	767	nM		binding	fluorescein labeled ligand
CHEMBL395191	IC50	'='	480	nM		binding	fluorescein labeled ligand
CHEMBL394968	IC50	'='	4560	nM		binding	fluorescein labeled ligand
CHEMBL248906	IC50	'='	670	nM		binding	fluorescein labeled ligand
CHEMBL245656	IC50	'='	110	nM		binding	fluorescein labeled ligand
CHEMBL247925	IC50	'='	227	nM		binding	fluorescein labeled ligand
CHEMBL247719	Activity				Not Active	binding	fluorescein labeled ligand
CHEMBL371120	IC50	'='	1770	nM		binding	fluorescein labeled ligand
CHEMBL394967	IC50	'='	145	nM		binding	fluorescein labeled ligand
CHEMBL246272	IC50	'='	230	nM		binding	fluorescein labeled ligand
CHEMBL245674	IC50	'='	2900	nM		binding	fluorescein labeled ligand
CHEMBL428748	IC50	'='	773	nM		binding	fluorescein labeled ligand
CHEMBL394948	IC50	'='	284	nM		binding	fluorescein labeled ligand
CHEMBL396694	IC50	'='	540	nM		binding	fluorescein labeled ligand
CHEMBL247720	IC50	'='	3290	nM		binding	fluorescein labeled ligand
CHEMBL429823	IC50	'='	67	nM		binding	fluorescein labeled ligand
CHEMBL394947	IC50	'='	183	nM		binding	fluorescein labeled ligand
CHEMBL246270	IC50	'='	240	nM		binding	fluorescein labeled ligand
CHEMBL397120	IC50	'='	280	nM		binding	fluorescein labeled ligand
CHEMBL107367	IC50	'='	217	nM		binding	fluorescein labeled ligand
CHEMBL121	IC50	'='	256	nM		binding	fluorescein labeled ligand
CHEMBL394967	EC50	'='	1390	nM		transactivation			HEK293
CHEMBL394948	EC50	'='	221	nM		transactivation			HEK293
CHEMBL395191	EC50	'='	391	nM		transactivation			HEK293
CHEMBL247720	EC50	'='	307	nM		transactivation			HEK293
CHEMBL107367	EC50	'='	0.6	nM		transactivation			HEK293
CHEMBL248906	EC50	'='	249	nM		transactivation			HEK293
CHEMBL394968	EC50	'='	1180	nM		transactivation			HEK293
CHEMBL247925	EC50	'='	52	nM		transactivation			HEK293
CHEMBL246473	EC50	'='	108	nM		transactivation			HEK293
CHEMBL396694	EC50	'='	759	nM		transactivation			HEK293
CHEMBL246270	EC50	'='	295	nM		transactivation			HEK293
CHEMBL396696	EC50	'='	1210	nM		transactivation			HEK293
CHEMBL429823	EC50	'='	36	nM		transactivation			HEK293
CHEMBL245656	EC50	'='	359	nM		transactivation			HEK293
CHEMBL428748	EC50	'='	901	nM		transactivation			HEK293
CHEMBL248530	EC50	'='	136	nM		transactivation			HEK293
CHEMBL245674	EC50	'='	230	nM		transactivation			HEK293
CHEMBL247719	EC50	'='	1800	nM		transactivation			HEK293
CHEMBL371120	EC50	'='	3600	nM		transactivation			HEK293
CHEMBL394947	EC50	'='	412	nM		transactivation			HEK293
CHEMBL247926	EC50	'='	840	nM		transactivation			HEK293
CHEMBL246272	EC50	'='	67	nM		transactivation			HEK293
CHEMBL397120	EC50	'='	267	nM		transactivation			HEK293
CHEMBL121	EC50	'='	35	nM		transactivation			HEK293
CHEMBL229836	EC50	'='	1400	nM		transactivation			HEK293
CHEMBL425666	EC50	'='	1800	nM		transactivation			HEK293
CHEMBL229786	EC50	'='	3600	nM		transactivation			HEK293
CHEMBL427071	EC50	'='	7000	nM		transactivation			HEK293
CHEMBL229888	EC50	'>'	10000	nM		transactivation			HEK293
CHEMBL229573	EC50	'='	1000	nM		transactivation			HEK293
CHEMBL387914	EC50	'='	2200	nM		transactivation			HEK293
CHEMBL389903	EC50	'='	1300	nM		transactivation			HEK293
CHEMBL229778	EC50	'='	1300	nM		transactivation			HEK293
CHEMBL376165	EC50	'='	650	nM		transactivation			HEK293
CHEMBL38943	EC50	'='	8600	nM		transactivation			HEK293
CHEMBL229525	EC50	'='	1000	nM		transactivation			HEK293
CHEMBL229831	EC50	'='	2300	nM		transactivation			HEK293
CHEMBL375471	EC50	'='	1100	nM		transactivation			HEK293
CHEMBL426371	EC50	'='	6200	nM		transactivation			HEK293
CHEMBL390116	EC50	'='	2400	nM		transactivation			HEK293
CHEMBL229837	EC50	'='	1500	nM		transactivation			HEK293
CHEMBL229785	EC50	'>'	10000	nM		transactivation			HEK293
CHEMBL118939	EC50	'='	2600	nM		transactivation			HEK293
CHEMBL38943	EC50	'>'	10000	nM		transactivation			Not Mentioned
CHEMBL250673	EC50	'='	5500	nM		transactivation			Not Mentioned
CHEMBL446893	EC50	'='	2600	nM		transactivation			Not Mentioned
CHEMBL121	EC50	'='	300	nM		transactivation			Not Mentioned
CHEMBL38943	Activity	'>'	22	%		transactivation	rosiglitazone	100	Not Mentioned
CHEMBL446893	Activity	'='	96	%		transactivation	rosiglitazone	100	Not Mentioned
CHEMBL400300	Activity	'<'	10	%		transactivation	rosiglitazone	100	Not Mentioned
CHEMBL250673	Activity	'='	28	%		transactivation	rosiglitazone	100	Not Mentioned
CHEMBL394948	Intrinsic activity	'='	82	%		transactivation	rosiglitazone	108	HEK293
CHEMBL247719	Intrinsic activity	'='	32	%		transactivation	rosiglitazone	108	HEK293
CHEMBL245656	Intrinsic activity	'='	90	%		transactivation	rosiglitazone	108	HEK293
CHEMBL245674	Intrinsic activity	'='	20	%		transactivation	rosiglitazone	108	HEK293
CHEMBL395191	Intrinsic activity	'='	78	%		transactivation	rosiglitazone	108	HEK293
CHEMBL371120	Intrinsic activity	'='	28	%		transactivation	rosiglitazone	108	HEK293
CHEMBL429823	Intrinsic activity	'='	115	%		transactivation	rosiglitazone	108	HEK293
CHEMBL428748	Intrinsic activity	'='	43	%		transactivation	rosiglitazone	108	HEK293
CHEMBL396696	Intrinsic activity	'='	29	%		transactivation	rosiglitazone	108	HEK293
CHEMBL246473	Intrinsic activity	'='	82	%		transactivation	rosiglitazone	108	HEK293
CHEMBL394968	Intrinsic activity	'='	41	%		transactivation	rosiglitazone	108	HEK293
CHEMBL121	Intrinsic activity	'='	108	%		transactivation	rosiglitazone	108	HEK293
CHEMBL247925	Intrinsic activity	'='	70	%		transactivation	rosiglitazone	108	HEK293
CHEMBL247720	Intrinsic activity	'='	72	%		transactivation	rosiglitazone	108	HEK293
CHEMBL396694	Intrinsic activity	'='	58	%		transactivation	rosiglitazone	108	HEK293
CHEMBL247926	Intrinsic activity	'='	63	%		transactivation	rosiglitazone	108	HEK293
CHEMBL248906	Intrinsic activity	'='	90	%		transactivation	rosiglitazone	108	HEK293
CHEMBL246270	Intrinsic activity	'='	82	%		transactivation	rosiglitazone	108	HEK293
CHEMBL248530	Intrinsic activity	'='	66	%		transactivation	rosiglitazone	108	HEK293
CHEMBL394947	Intrinsic activity	'='	59	%		transactivation	rosiglitazone	108	HEK293
CHEMBL394967	Intrinsic activity	'='	49	%		transactivation	rosiglitazone	108	HEK293
CHEMBL397120	Intrinsic activity	'='	77	%		transactivation	rosiglitazone	108	HEK293
CHEMBL246272	Intrinsic activity	'='	73	%		transactivation	rosiglitazone	108	HEK293
CHEMBL107367	Intrinsic activity	'='	99	%		transactivation	rosiglitazone	108	HEK293
CHEMBL242007	EC50	'>'	3000	nM		transactivation			HEK293
CHEMBL244786	EC50	'>'	3000	nM		transactivation			HEK293
CHEMBL396496	EC50	'>'	3000	nM		transactivation			HEK293
CHEMBL232597	EC50	'>'	3000	nM		transactivation			HEK293
CHEMBL244573	EC50	'>'	3000	nM		transactivation			HEK293
CHEMBL428037	EC50	'>'	3000	nM		transactivation			HEK293
CHEMBL244575	EC50	'>'	3000	nM		transactivation			HEK293
CHEMBL395560	EC50	'>'	3000	nM		transactivation			HEK293
CHEMBL244574	EC50	'='	407	nM		transactivation			HEK293
CHEMBL400625	EC50	'>'	3000	nM		transactivation			HEK293
CHEMBL213487	IC50	'='	274	nM		binding	radio ligand
CHEMBL438088	IC50	'='	5400	nM		binding	radio ligand
CHEMBL213902	IC50	'='	318	nM		binding	radio ligand
CHEMBL211371	IC50	'='	316	nM		binding	radio ligand
CHEMBL387023	IC50	'='	13	nM		binding	radio ligand
CHEMBL378705	IC50	'='	742	nM		binding	radio ligand
CHEMBL377898	IC50	'='	399	nM		binding	radio ligand
CHEMBL265364	IC50	'='	135	nM		binding	radio ligand
CHEMBL209749	IC50	'='	251	nM		binding	radio ligand
CHEMBL213602	IC50	'='	15	nM		binding	radio ligand
CHEMBL211839	IC50	'='	25	nM		binding	radio ligand
CHEMBL210017	IC50	'='	139	nM		binding	radio ligand
CHEMBL211513	IC50	'='	24	nM		binding	radio ligand
CHEMBL213782	IC50	'='	1500	nM		binding	radio ligand
CHEMBL213675	IC50	'='	321	nM		binding	radio ligand
CHEMBL213678	IC50	'='	27	nM		binding	radio ligand
CHEMBL380070	IC50	'='	38	nM		binding	radio ligand
CHEMBL214272	IC50	'='	377	nM		binding	radio ligand
CHEMBL212813	IC50	'='	8000	nM		binding	radio ligand
CHEMBL209546	IC50	'='	178	nM		binding	radio ligand
CHEMBL427408	IC50	'>'	10000	nM		binding	radio ligand
CHEMBL384203	IC50	'='	223	nM		binding	radio ligand
CHEMBL210163	IC50	'='	71	nM		binding	radio ligand
CHEMBL380404	IC50	'='	196	nM		binding	radio ligand
CHEMBL122009	EC50	'='	3000	nM		transactivation			CHO-K1
CHEMBL118483	EC50	'='	3000	nM		transactivation			CHO-K1
CHEMBL119791	EC50	'='	4000	nM		transactivation			CHO-K1
CHEMBL331206	EC50	'='	2500	nM		transactivation			CHO-K1
CHEMBL118198	EC50	'='	10000	nM		transactivation			CHO-K1
CHEMBL118279	EC50	'='	5400	nM		transactivation			CHO-K1
CHEMBL118939	EC50	'>'	10000	nM		transactivation			CHO-K1
CHEMBL116947	EC50	'='	6200	nM		transactivation			CHO-K1
CHEMBL331469	EC50	'='	7400	nM		transactivation			CHO-K1
CHEMBL122070	EC50	'='	2400	nM		transactivation			CHO-K1
CHEMBL325723	EC50	'='	2800	nM		transactivation			CHO-K1
CHEMBL120744	EC50	'='	2800	nM		transactivation			CHO-K1
CHEMBL120009	EC50	'='	400	nM		transactivation			CHO-K1
CHEMBL24458	EC50	'='	800	nM		transactivation			CHO-K1
CHEMBL120246	EC50				Not Active	transactivation			CHO-K1
CHEMBL333778	EC50				Not Active	transactivation			CHO-K1
CHEMBL120045	EC50				Not Active	transactivation			CHO-K1
CHEMBL120444	EC50				Not Active	transactivation			CHO-K1
CHEMBL120748	EC50				Not Active	transactivation			CHO-K1
CHEMBL120243	EC50				Not Active	transactivation			CHO-K1
CHEMBL116540	EC50				Not Active	transactivation			CHO-K1
CHEMBL120676	EC50				Not Active	transactivation			CHO-K1
CHEMBL119962	EC50				Not Active	transactivation			CHO-K1
CHEMBL324962	EC50				Not Active	transactivation			CHO-K1
CHEMBL118329	EC50				Not Active	transactivation			CHO-K1
CHEMBL120574	EC50				Not Active	transactivation			CHO-K1
CHEMBL333194	EC50				Not Active	transactivation			CHO-K1
CHEMBL331464	EC50				Not Active	transactivation			CHO-K1
CHEMBL118413	EC50				Not Active	transactivation			CHO-K1
CHEMBL120244	EC50				Not Active	transactivation			CHO-K1
CHEMBL326777	EC50				Not Active	transactivation			CHO-K1
CHEMBL420708	EC50				Not Active	transactivation			CHO-K1
CHEMBL262558	EC50				Not Active	transactivation			CHO-K1
CHEMBL120611	EC50				Not Active	transactivation			CHO-K1
CHEMBL118900	EC50				Not Active	transactivation			CHO-K1
CHEMBL118492	EC50				Not Active	transactivation			CHO-K1
CHEMBL331557	EC50				Not Active	transactivation			CHO-K1
CHEMBL118976	EC50				Not Active	transactivation			CHO-K1
CHEMBL120620	EC50				Not Active	transactivation			CHO-K1
CHEMBL120456	EC50				Not Active	transactivation			CHO-K1
CHEMBL119911	EC50				Not Active	transactivation			CHO-K1
CHEMBL332465	EC50				Not Active	transactivation			CHO-K1
CHEMBL118977	EC50				Not Active	transactivation			CHO-K1
CHEMBL300629	EC50	'='	300	nM		transactivation			COS-1
CHEMBL94496	EC50	'='	167	nM		transactivation			COS-1
CHEMBL420441	EC50	'='	165	nM		transactivation			COS-1
CHEMBL96758	EC50	'='	353	nM		transactivation			COS-1
CHEMBL96451	EC50	'='	85	nM		transactivation			COS-1
CHEMBL94397	EC50	'='	23	nM		transactivation			COS-1
CHEMBL94306	EC50	'='	14	nM		transactivation			COS-1
CHEMBL318684	EC50	'='	47	nM		transactivation			COS-1
CHEMBL92130	EC50	'='	69	nM		transactivation			COS-1
CHEMBL97529	EC50	'='	123	nM		transactivation			COS-1
CHEMBL328615	EC50	'='	27	nM		transactivation			COS-1
CHEMBL121	EC50	'='	20	nM		transactivation			COS-1
CHEMBL96143	EC50	'='	106	nM		transactivation			COS-1
CHEMBL328615	IC50	'='	56	nM		binding
CHEMBL318684	IC50	'='	64	nM		binding
CHEMBL97529	IC50	'='	330	nM		binding
CHEMBL96107	IC50	'='	76	nM		binding
CHEMBL96758	IC50	'='	226	nM		binding
CHEMBL94306	IC50	'='	57	nM		binding
CHEMBL300629	IC50	'='	180	nM		binding
CHEMBL94716	IC50	'='	335	nM		binding
CHEMBL96451	IC50	'='	77	nM		binding
CHEMBL96143	IC50	'='	78	nM		binding
CHEMBL92130	IC50	'='	300	nM		binding
CHEMBL94397	IC50	'='	30	nM		binding
CHEMBL327767	IC50	'='	291	nM		binding
CHEMBL420441	IC50	'='	73	nM		binding
CHEMBL330191	IC50	'='	195	nM		binding
CHEMBL121	IC50	'='	250	nM		binding
CHEMBL94496	IC50	'='	170	nM		binding
CHEMBL213361	EC50	'='	355	nM		transactivation			CV-1
CHEMBL378068	EC50	'='	9	nM		transactivation			CV-1
CHEMBL213315	EC50	'='	4	nM		transactivation			CV-1
CHEMBL212911	EC50	'='	4	nM		transactivation			CV-1
CHEMBL215126	EC50	'='	674	nM		transactivation			CV-1
CHEMBL212023	EC50	'='	968	nM		transactivation			CV-1
CHEMBL214921	EC50	'='	5	nM		transactivation			CV-1
CHEMBL215245	EC50	'='	402	nM		transactivation			CV-1
CHEMBL214026	EC50	'='	52	nM		transactivation			CV-1
CHEMBL377660	EC50	'='	8	nM		transactivation			CV-1
CHEMBL215582	EC50	'='	6	nM		transactivation			CV-1
CHEMBL212591	EC50	'='	228	nM		transactivation			CV-1
CHEMBL213314	EC50	'='	112	nM		transactivation			CV-1
CHEMBL215701	EC50	'='	102	nM		transactivation			CV-1
CHEMBL215127	EC50	'='	46	nM		transactivation			CV-1
CHEMBL121	EC50	'='	308	nM		transactivation			CV-1
CHEMBL234663	IC50	'='	7570	nM		binding	[3H]5-(4-(3-(5-methyl-2-phenyloxazol-4-yl)propanoyl)benzyl)thiazolidine-2,4-dione
CHEMBL234662	IC50	'='	13800	nM		binding	[3H]5-(4-(3-(5-methyl-2-phenyloxazol-4-yl)propanoyl)benzyl)thiazolidine-2,4-dione
CHEMBL234665	IC50	'>'	10000	nM		binding	[3H]5-(4-(3-(5-methyl-2-phenyloxazol-4-yl)propanoyl)benzyl)thiazolidine-2,4-dione
CHEMBL234659	IC50	'='	23600	nM		binding	[3H]5-(4-(3-(5-methyl-2-phenyloxazol-4-yl)propanoyl)benzyl)thiazolidine-2,4-dione
CHEMBL233177	IC50	'<'	11100	nM		binding	[3H]5-(4-(3-(5-methyl-2-phenyloxazol-4-yl)propanoyl)benzyl)thiazolidine-2,4-dione
CHEMBL391479	IC50	'='	33300	nM		binding	[3H]5-(4-(3-(5-methyl-2-phenyloxazol-4-yl)propanoyl)benzyl)thiazolidine-2,4-dione
CHEMBL232400	IC50	'>'	10000	nM		binding	[3H]5-(4-(3-(5-methyl-2-phenyloxazol-4-yl)propanoyl)benzyl)thiazolidine-2,4-dione
CHEMBL392950	IC50	'<'	11100	nM		binding	[3H]5-(4-(3-(5-methyl-2-phenyloxazol-4-yl)propanoyl)benzyl)thiazolidine-2,4-dione
CHEMBL232396	IC50	'='	21600	nM		binding	[3H]5-(4-(3-(5-methyl-2-phenyloxazol-4-yl)propanoyl)benzyl)thiazolidine-2,4-dione
CHEMBL391478	IC50	'='	9120	nM		binding	[3H]5-(4-(3-(5-methyl-2-phenyloxazol-4-yl)propanoyl)benzyl)thiazolidine-2,4-dione
CHEMBL232395	IC50	'='	5560	nM		binding	[3H]5-(4-(3-(5-methyl-2-phenyloxazol-4-yl)propanoyl)benzyl)thiazolidine-2,4-dione
CHEMBL234660	IC50	'>'	11000	nM		binding	[3H]5-(4-(3-(5-methyl-2-phenyloxazol-4-yl)propanoyl)benzyl)thiazolidine-2,4-dione
CHEMBL232397	IC50	'>'	10000	nM		binding	[3H]5-(4-(3-(5-methyl-2-phenyloxazol-4-yl)propanoyl)benzyl)thiazolidine-2,4-dione
CHEMBL230706	EC50	'='	0.36	nM		transactivation			HepG2
CHEMBL388645	EC50	'='	0.3	nM		transactivation			HepG2
CHEMBL230518	EC50	'='	2.9	nM		transactivation			HepG2
CHEMBL230705	EC50	'='	0.19	nM		transactivation			HepG2
CHEMBL230409	EC50	'='	6.8	nM		transactivation			HepG2
CHEMBL387588	EC50	'='	48	nM		transactivation			HepG2
CHEMBL230623	EC50	'='	5.2	nM		transactivation			HepG2
CHEMBL230622	EC50	'='	20	nM		transactivation			HepG2
CHEMBL230410	EC50	'='	7.7	nM		transactivation			HepG2
CHEMBL389298	EC50	'='	13	nM		transactivation			HepG2
CHEMBL230304	EC50	'='	5	nM		transactivation			HepG2
CHEMBL388422	EC50	'='	1	nM		transactivation			HepG2
CHEMBL231523	EC50	'='	0.55	nM		transactivation			HepG2
CHEMBL230305	EC50	'='	4	nM		transactivation			HepG2
CHEMBL389297	EC50	'='	0.54	nM		transactivation			HepG2
CHEMBL230814	EC50	'='	0.1	nM		transactivation			HepG2
CHEMBL231425	EC50	'='	2.1	nM		transactivation			HepG2
CHEMBL388008	EC50	'='	28	nM		transactivation			HepG2
CHEMBL230517	EC50	'='	2.1	nM		transactivation			HepG2
CHEMBL230707	EC50	'='	0.31	nM		transactivation			HepG2
CHEMBL230411	EC50	'='	3	nM		transactivation			HepG2
CHEMBL230519	EC50	'='	5	nM		transactivation			HepG2
CHEMBL282686	EC50	'='	3528	nM		transactivation			HepG2
CHEMBL121	EC50	'='	82	nM		transactivation			HepG2
CHEMBL393988	%max	'<'	10	%		transactivation	rosiglitazone	100	Not Mentioned
CHEMBL231696	%max	'>'	33	%		transactivation	rosiglitazone	100	Not Mentioned
CHEMBL234908	%max	'='	28	%		transactivation	rosiglitazone	100	Not Mentioned
CHEMBL446893	%max	'='	96	%		transactivation	rosiglitazone	100	Not Mentioned
CHEMBL234904	%max	'<'	10	%		transactivation	rosiglitazone	100	Not Mentioned
CHEMBL234693	%max	'<'	10	%		transactivation	rosiglitazone	100	Not Mentioned
CHEMBL234692	%max	'>'	28	%		transactivation	rosiglitazone	100	Not Mentioned
CHEMBL234903	%max	'<'	10	%		transactivation	rosiglitazone	100	Not Mentioned
CHEMBL393987	%max	'<'	10	%		transactivation	rosiglitazone	100	Not Mentioned
CHEMBL393186	%max	'>'	10	%		transactivation	rosiglitazone	100	Not Mentioned
CHEMBL234485	%max	'<'	10	%		transactivation	rosiglitazone	100	Not Mentioned
CHEMBL234691	%max	'>'	13	%		transactivation	rosiglitazone	100	Not Mentioned
CHEMBL234689	%max	'<'	10	%		transactivation	rosiglitazone	100	Not Mentioned
CHEMBL234906	%max	'>'	12	%		transactivation	rosiglitazone	100	Not Mentioned
CHEMBL234905	%max	'<'	10	%		transactivation	rosiglitazone	100	Not Mentioned
CHEMBL234484	%max	'<'	10	%		transactivation	rosiglitazone	100	Not Mentioned
CHEMBL437364	%max	'>'	11	%		transactivation	rosiglitazone	100	Not Mentioned
CHEMBL234907	%max	'='	23	%		transactivation	rosiglitazone	100	Not Mentioned
CHEMBL38943	%max	'>'	22	%		transactivation	rosiglitazone	100	Not Mentioned
CHEMBL1779473	EC50	'='	4400	nM		transactivation			HEK293
CHEMBL1779474	EC50	'='	4600	nM		transactivation			HEK293
CHEMBL1779481	EC50	'='	830	nM		transactivation			HEK293
CHEMBL1222408	EC50	'='	820	nM		transactivation			HEK293
CHEMBL255593	EC50	'>'	10000	nM		transactivation			HEK293
CHEMBL255392	EC50	'='	9600	nM		transactivation			HEK293
CHEMBL1779478	EC50	'='	460	nM		transactivation			HEK293
CHEMBL1779480	EC50	'='	920	nM		transactivation			HEK293
CHEMBL1779475	EC50	'>'	10000	nM		transactivation			HEK293
CHEMBL1779482	EC50	'='	990	nM		transactivation			HEK293
CHEMBL270587	EC50	'='	340	nM		transactivation			HEK293
CHEMBL1779476	EC50	'='	710	nM		transactivation			HEK293
CHEMBL1779479	EC50	'='	780	nM		transactivation			HEK293
CHEMBL1779477	EC50	'>'	10000	nM		transactivation			HEK293
CHEMBL52633	IC50	'='	250	nM		binding
CHEMBL50680	IC50	'='	180	nM		binding
CHEMBL52426	IC50	'='	2000	nM		binding
CHEMBL50572	IC50	'='	480	nM		binding
CHEMBL50755	IC50	'='	1000	nM		binding
CHEMBL301156	IC50	'='	3000	nM		binding
CHEMBL121	IC50	'='	250	nM		binding
CHEMBL50259	IC50	'>'	15000	nM		binding
CHEMBL50143	IC50	'='	120	nM		binding
CHEMBL50885	IC50	'='	460	nM		binding
CHEMBL53746	IC50	'='	130	nM		binding
CHEMBL53688	IC50	'='	2000	nM		binding
CHEMBL298187	IC50	'='	430	nM		binding
CHEMBL54097	IC50	'='	6700	nM		binding
CHEMBL51603	IC50	'='	1800	nM		binding
CHEMBL430970	IC50	'='	130	nM		binding
CHEMBL54197	IC50	'='	2600	nM		binding
CHEMBL50984	IC50	'='	5700	nM		binding
CHEMBL300026	IC50	'='	820	nM		binding
CHEMBL146027	Ki	'>'	3162.28	nM		binding	[3H]-BRL 49653
CHEMBL423026	Ki	'='	1.479	nM		binding	[3H]-BRL 49653
CHEMBL346415	Ki	'='	794.33	nM		binding	[3H]-BRL 49653
CHEMBL146201	Ki	'='	1318.26	nM		binding	[3H]-BRL 49653
CHEMBL146822	Ki	'='	3.311	nM		binding	[3H]-BRL 49653
CHEMBL356350	Ki	'='	11.75	nM		binding	[3H]-BRL 49653
CHEMBL145929	Ki	'='	1949.84	nM		binding	[3H]-BRL 49653
CHEMBL342512	Ki	'>'	3162.28	nM		binding	[3H]-BRL 49653
CHEMBL107367	Ki	'='	1.148	nM		binding	[3H]-BRL 49653
CHEMBL149609	Ki	'>'	3162.28	nM		binding	[3H]-BRL 49653
CHEMBL17805	Ki	'='	26.92	nM		binding	[3H]-BRL 49653
CHEMBL357479	Ki	'='	51.29	nM		binding	[3H]-BRL 49653
CHEMBL148060	Ki	'='	85.11	nM		binding	[3H]-BRL 49653
CHEMBL146243	Ki	'>'	3162.28	nM		binding	[3H]-BRL 49653
CHEMBL359377	Ki	'='	162.18	nM		binding	[3H]-BRL 49653
CHEMBL148301	Ki	'='	5.248	nM		binding	[3H]-BRL 49653
CHEMBL147826	Ki	'='	3.715	nM		binding	[3H]-BRL 49653
CHEMBL121	Ki	'='	46.77	nM		binding	[3H]-BRL 49653
CHEMBL147042	Ki	'='	1258.93	nM		binding	[3H]-BRL 49653
CHEMBL346219	Ki	'='	6.457	nM		binding	[3H]-BRL 49653
CHEMBL147694	Ki	'='	32.36	nM		binding	[3H]-BRL 49653
CHEMBL146123	Ki	'='	123.03	nM		binding	[3H]-BRL 49653
CHEMBL356350	Ki	'>'	3162.28	nM		binding	[3H]-BRL 49653
CHEMBL145829	Ki	'='	162.18	nM		binding	[3H]-BRL 49653
CHEMBL144877	Ki	'='	758.58	nM		binding	[3H]-BRL 49653
CHEMBL147608	Ki	'>'	3162.28	nM		binding	[3H]-BRL 49653
CHEMBL146614	Ki	'='	28.18	nM		binding	[3H]-BRL 49653
CHEMBL408	Ki	'='	302	nM		binding	[3H]-BRL 49653
CHEMBL358298	Ki	'>'	3162.28	nM		binding	[3H]-BRL 49653
CHEMBL146322	Ki	'='	33.11	nM		binding	[3H]-BRL 49653
CHEMBL7002	Ki	'='	3090.3	nM		binding	[3H]-BRL 49653
CHEMBL434063	Ki	'='	1.413	nM		binding	[3H]-BRL 49653
CHEMBL595	Ki	'='	1230.27	nM		binding	[3H]-BRL 49653
CHEMBL358137	Ki	'='	5.129	nM		binding	[3H]-BRL 49653
CHEMBL59132	Ki	'='	4.266	nM		binding	[3H]-BRL 49653
CHEMBL434063	Ki	'='	104.71	nM		binding	[3H]-BRL 49653
CHEMBL408	Ki	'='	3800	nM		binding	[125I]SB 236636
CHEMBL306229	Ki	'='	2.5	nM		binding	[125I]SB 236636
CHEMBL307544	Ki	'='	600	nM		binding	[125I]SB 236636
CHEMBL70005	Ki	'='	6000	nM		binding	[125I]SB 236636
CHEMBL66767	Ki	'='	37	nM		binding	[125I]SB 236636
CHEMBL17805	Ki	'='	22	nM		binding	[125I]SB 236636
CHEMBL67948	Ki	'='	15	nM		binding	[125I]SB 236636
CHEMBL67098	Ki	'='	33	nM		binding	[125I]SB 236636
CHEMBL65805	Ki	'='	0.4	nM		binding	[125I]SB 236636
CHEMBL214719	EC50	'='	630	nM		transactivation			Not Mentioned
CHEMBL518033	Activity				Not Active	transactivation			Not Mentioned
CHEMBL480298	EC50	'='	3800	nM		transactivation			Not Mentioned
CHEMBL460198	Activity				Not Active	transactivation			Not Mentioned
CHEMBL450409	Activity				Not Active	transactivation			Not Mentioned
CHEMBL513749	EC50	'>'	1000	nM		transactivation			Not Mentioned
CHEMBL512652	EC50	'>'	1000	nM		transactivation			Not Mentioned
CHEMBL516960	EC50	'>'	1000	nM		transactivation			Not Mentioned
CHEMBL470382	EC50	'>'	1000	nM		transactivation			Not Mentioned
CHEMBL470561	EC50	'>'	1000	nM		transactivation			Not Mentioned
CHEMBL516463	EC50	'>'	1000	nM		transactivation			Not Mentioned
CHEMBL512867	EC50	'>'	1000	nM		transactivation			Not Mentioned
CHEMBL469745	EC50	'>'	1000	nM		transactivation			Not Mentioned
CHEMBL470560	EC50	'>'	1000	nM		transactivation			Not Mentioned
CHEMBL472050	EC50	'>'	1000	nM		transactivation			Not Mentioned
CHEMBL513882	EC50	'>'	1000	nM		transactivation			Not Mentioned
CHEMBL470559	EC50	'>'	1000	nM		transactivation			Not Mentioned
CHEMBL469744	EC50	'>'	1000	nM		transactivation			Not Mentioned
CHEMBL469534	EC50	'>'	1000	nM		transactivation			Not Mentioned
CHEMBL470586	EC50	'>'	1000	nM		transactivation			Not Mentioned
CHEMBL470383	EC50	'>'	1000	nM		transactivation			Not Mentioned
CHEMBL512715	EC50	'>'	1000	nM		transactivation			Not Mentioned
CHEMBL186179	EC50	'='	90	nM		transactivation			HepG2
CHEMBL481683	EC50	'='	450	nM		transactivation			HepG2
CHEMBL481551	EC50	'='	15	nM		transactivation			HepG2
CHEMBL481550	EC50	'='	100	nM		transactivation			HepG2
CHEMBL270960	EC50	'='	6850	nM		transactivation			HepG2
CHEMBL482334	EC50	'='	560	nM		transactivation			HepG2
CHEMBL520272	EC50	'='	31	nM		transactivation			HepG2
CHEMBL481549	EC50	'='	430	nM		transactivation			HepG2
CHEMBL592054	EC50	'='	4	nM		transactivation			HepG2
CHEMBL516510	EC50	'='	303	nM		transactivation			CV-1
CHEMBL516511	EC50	'='	190	nM		transactivation			CV-1
CHEMBL461533	EC50	'='	50	nM		transactivation			CV-1
CHEMBL473717	EC50	'='	80	nM		transactivation			CV-1
CHEMBL471533	EC50	'='	310	nM		transactivation			CV-1
CHEMBL470322	EC50	'='	110	nM		transactivation			CV-1
CHEMBL515667	EC50	'='	1700	nM		transactivation			CV-1
CHEMBL455158	EC50	'='	50	nM		transactivation			CV-1
CHEMBL455157	EC50	'='	8	nM		transactivation			CV-1
CHEMBL472399	EC50	'='	30	nM		transactivation			CV-1
CHEMBL454651	EC50	'='	1000	nM		transactivation			CV-1
CHEMBL461145	EC50	'='	60	nM		transactivation			CV-1
CHEMBL460278	EC50	'='	15	nM		transactivation			CV-1
CHEMBL518348	EC50	'='	6	nM		transactivation			CV-1
CHEMBL221074	EC50	'='	800	nM		transactivation			CV-1
CHEMBL509680	EC50	'='	30	nM		transactivation			CV-1
CHEMBL516824	EC50	'='	270	nM		transactivation			CV-1
CHEMBL462580	EC50	'='	30	nM		transactivation			CV-1
CHEMBL473096	EC50	'='	176	nM		transactivation			CV-1
CHEMBL473299	EC50	'='	130	nM		transactivation			CV-1
CHEMBL473300	EC50	'='	28	nM		transactivation			CV-1
CHEMBL462554	EC50	'='	478	nM		transactivation			CV-1
CHEMBL457062	EC50	'>'	25000	nM		transactivation			CV-1
CHEMBL516964	EC50	'='	69	nM		transactivation			CV-1
CHEMBL454678	EC50	'='	8	nM		transactivation			CV-1
CHEMBL472571	EC50	'='	30	nM		transactivation			CV-1
CHEMBL513035	EC50	'='	20	nM		transactivation			CV-1
CHEMBL513594	EC50	'='	25	nM		transactivation			CV-1
CHEMBL219586	EC50	'='	9710	nM		transactivation			CV-1
CHEMBL1773255	Activity				Not Active	transactivation	rosiglitazone		MEF
CHEMBL1688453	Activity				Not Active	transactivation	rosiglitazone		MEF
CHEMBL1773258	Activity				Not Active	transactivation	rosiglitazone		MEF
CHEMBL1773261	Activity				Not Active	transactivation	rosiglitazone		MEF
CHEMBL1773252	Activity				Not Active	transactivation	rosiglitazone		MEF
CHEMBL1773248	Activity				Not Active	transactivation	rosiglitazone		MEF
CHEMBL234834	Activity				Not Active	transactivation	rosiglitazone		MEF
CHEMBL488384	Activity				Not Active	transactivation	rosiglitazone		MEF
CHEMBL234057	Activity				Not Active	transactivation	rosiglitazone		MEF
CHEMBL1773253	Activity				Not Active	transactivation	rosiglitazone		MEF
CHEMBL394666	Activity				Not Active	transactivation	rosiglitazone		MEF
CHEMBL1688458	Activity				Not Active	transactivation	rosiglitazone		MEF
CHEMBL1773250	Activity				Not Active	transactivation	rosiglitazone		MEF
CHEMBL1773249	Activity				Not Active	transactivation	rosiglitazone		MEF
CHEMBL1688454	Activity				Not Active	transactivation	rosiglitazone		MEF
CHEMBL1773259	Activity				Not Active	transactivation	rosiglitazone		MEF
CHEMBL1688463	Activity				Not Active	transactivation	rosiglitazone		MEF
CHEMBL1773247	Activity				Not Active	transactivation	rosiglitazone		MEF
CHEMBL1773256	Activity				Not Active	transactivation	rosiglitazone		MEF
CHEMBL1773257	Activity				Not Active	transactivation	rosiglitazone		MEF
CHEMBL1688455	Activity				Not Active	transactivation	rosiglitazone		MEF
CHEMBL1773167	Activity				Not Active	transactivation	rosiglitazone		MEF
CHEMBL1688465	Activity				Not Active	transactivation	rosiglitazone		MEF
CHEMBL1688482	Activity				Not Active	transactivation	rosiglitazone		MEF
CHEMBL1773246	Activity				Not Active	transactivation	rosiglitazone		MEF
CHEMBL1688457	Activity				Not Active	transactivation	rosiglitazone		MEF
CHEMBL1773251	Activity				Not Active	transactivation	rosiglitazone		MEF
CHEMBL1773254	Activity				Not Active	transactivation	rosiglitazone		MEF
CHEMBL234269	Activity				Not Active	transactivation	rosiglitazone		MEF
CHEMBL1773260	Activity				Not Active	transactivation	rosiglitazone		MEF
CHEMBL1688452	Activity				Not Active	transactivation	rosiglitazone		MEF
CHEMBL309882	IC50	'='	51	nM		binding
CHEMBL78529	IC50	'='	290	nM		binding
CHEMBL79426	IC50	'='	297	nM		binding
CHEMBL82602	IC50	'='	24	nM		binding
CHEMBL77502	IC50	'='	10	nM		binding
CHEMBL81676	IC50	'='	71	nM		binding
CHEMBL264385	IC50	'='	15	nM		binding
CHEMBL81208	IC50	'='	128	nM		binding
CHEMBL81248	IC50	'='	14	nM		binding
CHEMBL412371	IC50	'='	388	nM		binding
CHEMBL82193	IC50	'='	2241	nM		binding
CHEMBL82034	IC50	'='	18	nM		binding
CHEMBL312717	IC50	'='	169	nM		binding
CHEMBL81592	IC50	'='	491	nM		binding
CHEMBL514264	EC50	'='	38	nM		transactivation			HEK293
CHEMBL456973	EC50	'='	36	nM		transactivation			HEK293
CHEMBL456355	EC50	'='	160	nM		transactivation			HEK293
CHEMBL457623	EC50	'='	35	nM		transactivation			HEK293
CHEMBL514256	EC50	'='	15	nM		transactivation			HEK293
CHEMBL456752	EC50	'='	140	nM		transactivation			HEK293
CHEMBL402161	EC50	'='	110	nM		transactivation			HEK293
CHEMBL456753	EC50	'='	190	nM		transactivation			HEK293
CHEMBL455957	EC50	'>'	10000	nM		transactivation			HEK293
CHEMBL387914	EC50	'='	2600	nM		transactivation			HEK293
CHEMBL457405	EC50	'='	22	nM		transactivation			HEK293
CHEMBL456974	EC50	'='	24	nM		transactivation			HEK293
CHEMBL462982	EC50	'='	1100	nM		transactivation			HEK293
CHEMBL402840	EC50	'='	43	nM		transactivation			HEK293
CHEMBL118939	EC50	'='	2600	nM		transactivation			HEK293
CHEMBL327481	EC50	'='	8500	nM		transactivation			HEK293
CHEMBL89996	EC50	'='	2000	nM		transactivation			HEK293
CHEMBL86817	EC50	'='	2900	nM		transactivation			HEK293
CHEMBL86658	EC50	'='	170	nM		transactivation			HEK293
CHEMBL314483	EC50	'='	2700	nM		transactivation			HEK293
CHEMBL89152	EC50	'='	1500	nM		transactivation			HEK293
CHEMBL87928	EC50	'='	800	nM		transactivation			HEK293
CHEMBL315048	EC50	'='	4000	nM		transactivation			HEK293
CHEMBL87380	EC50	'='	3100	nM		transactivation			HEK293
CHEMBL86657	EC50	'='	3300	nM		transactivation			HEK293
CHEMBL87307	EC50	'='	900	nM		transactivation			HEK293
CHEMBL420973	EC50	'='	600	nM		transactivation			HEK293
CHEMBL121	EC50	'='	160	nM		transactivation			HEK293
CHEMBL328455	EC50	'='	300	nM		transactivation			HEK293
CHEMBL328099	EC50	'='	2200	nM		transactivation			HEK293
CHEMBL86688	EC50	'='	4300	nM		transactivation			HEK293
CHEMBL24038	EC50	'='	570	nM		transactivation			HEK293
CHEMBL421729	EC50	'='	1700	nM		transactivation			HEK293
CHEMBL146217	Ki	'='	5.129	nM		binding
CHEMBL145824	Ki	'='	4.169	nM		binding
CHEMBL2112021	Ki	'='	1548.82	nM		binding
CHEMBL150232	Ki	'='	2.818	nM		binding
CHEMBL150215	Ki	'='	2.692	nM		binding
CHEMBL148668	Ki	'='	0.9772	nM		binding
CHEMBL146562	Ki	'='	2.344	nM		binding
CHEMBL146584	Ki	'='	2.754	nM		binding
CHEMBL147770	Ki	'='	2.399	nM		binding
CHEMBL414442	Ki	'='	1.82	nM		binding
CHEMBL148384	Ki	'='	0.9333	nM		binding
CHEMBL2112871	Ki	'='	4.074	nM		binding
CHEMBL359333	Ki	'='	13.49	nM		binding
CHEMBL356353	Ki	'>'	3162.28	nM		binding
CHEMBL147282	Ki	'='	66.07	nM		binding
CHEMBL148300	Ki	'='	3.02	nM		binding
CHEMBL344776	Ki	'='	1148.15	nM		binding
CHEMBL149309	Ki	'='	154.88	nM		binding
CHEMBL2112020	Ki	'='	190.55	nM		binding
CHEMBL147419	Ki	'='	15.49	nM		binding
CHEMBL149381	Ki	'='	5.623	nM		binding
CHEMBL347788	Ki	'='	3.236	nM		binding
CHEMBL146579	Ki	'='	2.692	nM		binding
CHEMBL421781	Ki	'='	23.44	nM		binding
CHEMBL359150	Ki	'='	15.49	nM		binding
CHEMBL147021	Ki	'='	1.738	nM		binding
CHEMBL146821	Ki	'='	39.81	nM		binding
CHEMBL149780	Ki	'='	2.57	nM		binding
CHEMBL145886	Ki	'='	2.291	nM		binding
CHEMBL146355	Ki	'='	2.239	nM		binding
CHEMBL149714	Ki	'='	6.457	nM		binding
CHEMBL146258	Ki	'='	8.71	nM		binding
CHEMBL345541	Ki	'='	9.772	nM		binding
CHEMBL146687	Ki	'='	251.19	nM		binding
CHEMBL146530	Ki	'='	3.388	nM		binding
CHEMBL146637	Ki	'='	2.63	nM		binding
CHEMBL2112870	Ki	'='	1.622	nM		binding
CHEMBL342990	Ki	'='	42.66	nM		binding
CHEMBL149147	Ki	'='	645.65	nM		binding
CHEMBL145938	Ki	'='	812.83	nM		binding
CHEMBL148596	Ki	'='	1.479	nM		binding
CHEMBL106666	Ki	'='	3.715	nM		binding
CHEMBL107367	Ki	'='	1.148	nM		binding
CHEMBL327481	Max	'='	72	%		transactivation	rosiglitazone	100	HEK293
CHEMBL89996	Max	'='	85	%		transactivation	rosiglitazone	100	HEK293
CHEMBL86658	Max	'='	108	%		transactivation	rosiglitazone	100	HEK293
CHEMBL87380	Max	'='	87	%		transactivation	rosiglitazone	100	HEK293
CHEMBL87307	Max	'='	85	%		transactivation	rosiglitazone	100	HEK293
CHEMBL315048	Max	'='	94	%		transactivation	rosiglitazone	100	HEK293
CHEMBL86688	Max	'='	90	%		transactivation	rosiglitazone	100	HEK293
CHEMBL86817	Max	'='	161	%		transactivation	rosiglitazone	100	HEK293
CHEMBL89152	Max	'='	89	%		transactivation	rosiglitazone	100	HEK293
CHEMBL87928	Max	'='	112	%		transactivation	rosiglitazone	100	HEK293
CHEMBL328099	Max	'='	101	%		transactivation	rosiglitazone	100	HEK293
CHEMBL86657	Max	'='	91	%		transactivation	rosiglitazone	100	HEK293
CHEMBL420973	Max	'='	104	%		transactivation	rosiglitazone	100	HEK293
CHEMBL421729	Max	'='	129	%		transactivation	rosiglitazone	100	HEK293
CHEMBL314483	Max	'='	75	%		transactivation	rosiglitazone	100	HEK293
CHEMBL328455	Max	'='	101	%		transactivation	rosiglitazone	100	HEK293
CHEMBL24038	Max	'='	117	%		transactivation	rosiglitazone	100	HEK293
CHEMBL121	Max	'='	100	%		transactivation	rosiglitazone	100	HEK293
CHEMBL247508	EC50	'='	3690	nM		transactivation			HEK293
CHEMBL247507	EC50	'='	6340	nM		transactivation			HEK293
CHEMBL442437	Activity	'='	83	%		transactivation	rosiglitazone	100	Huh-7
CHEMBL253731	Activity	'='	49	%		transactivation	rosiglitazone	100	Huh-7
CHEMBL253311	Activity	'='	54	%		transactivation	rosiglitazone	100	Huh-7
CHEMBL214719	Activity	'='	47	%		transactivation	rosiglitazone	100	Huh-7
CHEMBL38943	Activity	'='	80	%		transactivation	rosiglitazone	100	CV-1
CHEMBL221755	Activity	'='	74	%		transactivation	rosiglitazone	100	CV-1
CHEMBL376641	Activity	'='	63	%		transactivation	rosiglitazone	100	CV-1
CHEMBL218687	Activity	'='	76	%		transactivation	rosiglitazone	100	CV-1
CHEMBL221074	Activity	'='	78	%		transactivation	rosiglitazone	100	CV-1
CHEMBL442437	EC50	'='	40	nM		transactivation			Huh-7
CHEMBL253731	EC50	'='	69	nM		transactivation			Huh-7
CHEMBL253311	EC50	'='	84	nM		transactivation			Huh-7
CHEMBL214719	EC50	'='	680	nM		transactivation			Huh-7
CHEMBL400132	EC50	'='	260	nM		binding	[3H]rosiglitazone
CHEMBL254815	EC50	'='	130	nM		binding	[3H]rosiglitazone
CHEMBL253120	EC50	'='	180	nM		binding	[3H]rosiglitazone
CHEMBL254814	EC50	'='	160	nM		binding	[3H]rosiglitazone
CHEMBL467349	EC50	'='	4096	nM		transactivation	control		HepG2
CHEMBL512789	EC50	'='	5010	nM		transactivation	control		HepG2
CHEMBL468160	EC50	'='	239	nM		transactivation	control		HepG2
CHEMBL121	EC50	'='	50	nM		transactivation	control		HepG2
CHEMBL468159	EC50	'='	19.8	nM		transactivation	control		HepG2
CHEMBL513145	EC50	'='	1385	nM		transactivation	control		HepG2
CHEMBL481551	EC50	'='	15	nM		transactivation	control		HepG2
CHEMBL512084	EC50	'='	96	nM		transactivation	control		HepG2
CHEMBL119795	EC50	'='	690	nM		transactivation			U2OS
CHEMBL118274	EC50	'='	150	nM		transactivation			U2OS
CHEMBL118816	EC50	'='	2880	nM		transactivation			U2OS
CHEMBL115463	EC50	'='	2110	nM		transactivation			U2OS
CHEMBL117764	EC50	'='	2050	nM		transactivation			U2OS
CHEMBL117402	EC50	'='	3020	nM		transactivation			U2OS
CHEMBL116920	EC50	'='	90	nM		transactivation			U2OS
CHEMBL119097	EC50	'='	830	nM		transactivation			U2OS
CHEMBL117796	EC50	'='	3160	nM		transactivation			U2OS
CHEMBL325844	EC50	'='	530	nM		transactivation			U2OS
CHEMBL324027	EC50	'='	1500	nM		transactivation			U2OS
CHEMBL119217	EC50	'='	3430	nM		transactivation			U2OS
CHEMBL331388	EC50	'='	1120	nM		transactivation			U2OS
CHEMBL118577	EC50	'='	3800	nM		transactivation			U2OS
CHEMBL293526	EC50	'='	83	nM		transactivation			U2OS
CHEMBL121	EC50	'='	40	nM		transactivation			U2OS
CHEMBL1778837	EC50	'='	26300	nM		transactivation			CV-1
CHEMBL1778732	EC50	'='	20800	nM		transactivation			CV-1
CHEMBL1778840	EC50	'='	910	nM		transactivation			CV-1
CHEMBL38943	EC50	'='	4100	nM		transactivation			CV-1
CHEMBL1778836	EC50	'='	2600	nM		transactivation			CV-1
CHEMBL1778834	EC50	'>'	10000	nM		transactivation			CV-1
CHEMBL1778835	EC50	'='	1000	nM		transactivation			CV-1
CHEMBL1644614	EC50	'>'	10000	nM		transactivation			CV-1
CHEMBL1778829	EC50	'='	19100	nM		transactivation			CV-1
CHEMBL1778831	EC50	'='	31100	nM		transactivation			CV-1
CHEMBL1778832	EC50	'>'	10000	nM		transactivation			CV-1
CHEMBL1778833	EC50	'='	5900	nM		transactivation			CV-1
CHEMBL1778830	EC50	'='	26400	nM		transactivation			CV-1
CHEMBL1777824	EC50	'='	14600	nM		transactivation			CV-1
CHEMBL1778733	EC50	'='	25100	nM		transactivation			CV-1
CHEMBL1778838	EC50	'>'	10000	nM		transactivation			CV-1
CHEMBL1778839	EC50	'='	5100	nM		transactivation			CV-1
CHEMBL24458	EC50	'='	900	nM		transactivation			CV-1
CHEMBL219586	EC50	'>'	10000	nM		transactivation			CV-1
CHEMBL121	EC50	'='	100	nM		transactivation			CV-1
CHEMBL101123	EC50	'='	320	nM		transactivation			CV-1
CHEMBL318696	EC50	'='	0.5	nM		transactivation			CV-1
CHEMBL317424	EC50	'='	30	nM		transactivation			CV-1
CHEMBL102004	EC50	'='	4	nM		transactivation			CV-1
CHEMBL322690	EC50	'='	170	nM		transactivation			CV-1
CHEMBL443218	EC50	'='	81	nM		transactivation			CV-1
CHEMBL306757	EC50	'='	2	uM		transactivation			HEK293
CHEMBL121	EC50	'='	0.19	uM		transactivation			HEK293
CHEMBL76786	EC50	'='	0.96	uM		transactivation			HEK293
CHEMBL311395	EC50	'='	1.3	uM		transactivation			HEK293
CHEMBL305934	EC50	'='	1.8	uM		transactivation			HEK293
CHEMBL311147	EC50	'='	0.57	uM		transactivation			HEK293
CHEMBL78228	EC50	'>'	5	uM		transactivation			HEK293
CHEMBL77127	EC50	'>'	5	uM		transactivation			HEK293
CHEMBL77363	EC50	'='	1.1	uM		transactivation			HEK293
CHEMBL309032	EC50	'>'	5	uM		transactivation			HEK293
CHEMBL76203	EC50	'='	0.52	uM		transactivation			HEK293
CHEMBL76261	EC50	'>'	5	uM		transactivation			HEK293
CHEMBL76743	EC50	'>'	5	uM		transactivation			HEK293
CHEMBL77420	EC50	'>'	5	uM		transactivation			HEK293
CHEMBL307229	EC50	'>'	5	uM		transactivation			HEK293
CHEMBL77398	EC50	'='	2.1	uM		transactivation			HEK293
CHEMBL312299	EC50	'>'	5	uM		transactivation			HEK293
CHEMBL306956	EC50	'='	1.1	uM		transactivation			HEK293
CHEMBL75966	EC50	'>'	5	uM		transactivation			HEK293
CHEMBL77026	EC50	'='	1.9	uM		transactivation			HEK293
CHEMBL305654	EC50	'>'	5	uM		transactivation			HEK293
CHEMBL308325	EC50	'='	1.8	uM		transactivation			HEK293
CHEMBL77018	EC50	'='	0.59	uM		transactivation			HEK293
CHEMBL310695	EC50	'='	0.5	uM		transactivation			HEK293
CHEMBL133882	MEC				Not Detected	transactivation	pioglitazone		U2OS
CHEMBL133045	MEC				Not Detected	transactivation	pioglitazone		U2OS
CHEMBL131153	MEC				Not Detected	transactivation	pioglitazone		U2OS
CHEMBL133046	MEC				Not Detected	transactivation	pioglitazone		U2OS
CHEMBL334949	MEC				Not Detected	transactivation	pioglitazone		U2OS
CHEMBL337190	MEC				Not Detected	transactivation	pioglitazone		U2OS
CHEMBL280438	MEC				Not Detected	transactivation	pioglitazone		U2OS
CHEMBL134031	MEC				Not Detected	transactivation	pioglitazone		U2OS
CHEMBL134174	MEC				Not Detected	transactivation	pioglitazone		U2OS
CHEMBL134249	MEC				Not Detected	transactivation	pioglitazone		U2OS
CHEMBL336558	MEC				Not Detected	transactivation	pioglitazone		U2OS
CHEMBL133645	MEC				Not Detected	transactivation	pioglitazone		U2OS
CHEMBL132623	MEC				Not Detected	transactivation	pioglitazone		U2OS
CHEMBL133351	MEC				Not Detected	transactivation	pioglitazone		U2OS
CHEMBL337716	MEC				Not Detected	transactivation	pioglitazone		U2OS
CHEMBL336722	MEC				Not Detected	transactivation	pioglitazone		U2OS
CHEMBL132134	MEC				Not Detected	transactivation	pioglitazone		U2OS
CHEMBL361773	Fold activation	'='	9	fold		transactivation	rosiglitazone	9	Not Mentioned
CHEMBL182583	Fold activation	'='	9	fold		transactivation	rosiglitazone	9	Not Mentioned
CHEMBL180633	Fold activation	'='	4	fold		transactivation	rosiglitazone	9	Not Mentioned
CHEMBL180430	Fold activation	'='	3	fold		transactivation	rosiglitazone	9	Not Mentioned
CHEMBL121	Fold activation	'='	9	fold		transactivation	rosiglitazone	9	Not Mentioned
CHEMBL361351	Fold activation	'='	4	fold		transactivation	rosiglitazone	9	Not Mentioned
CHEMBL183191	Fold activation	'='	5	fold		transactivation	rosiglitazone	9	Not Mentioned
CHEMBL183909	Fold activation	'='	3	fold		transactivation	rosiglitazone	9	Not Mentioned
CHEMBL183213	Fold activation	'='	3	fold		transactivation	rosiglitazone	9	Not Mentioned
CHEMBL361617	Fold activation	'='	3	fold		transactivation	rosiglitazone	9	Not Mentioned
CHEMBL183502	Fold activation	'='	12	fold		transactivation	rosiglitazone	9	Not Mentioned
CHEMBL183667	Fold activation	'='	4	fold		transactivation	rosiglitazone	9	Not Mentioned
CHEMBL182941	Fold activation	'='	7	fold		transactivation	rosiglitazone	9	Not Mentioned
CHEMBL115310	EC50	'>'	10000	nM		transactivation			CV-1
CHEMBL420314	EC50	'>'	10000	nM		transactivation			CV-1
CHEMBL113006	EC50	'>'	10000	nM		transactivation			CV-1
CHEMBL275682	EC50	'>'	10000	nM		transactivation			CV-1
CHEMBL121	EC50	'='	89.13	nM		transactivation			CV-1
CHEMBL268513	EC50	'='	7079.46	nM		transactivation			CV-1
CHEMBL408	EC50	'='	537.03	nM		transactivation			CV-1
CHEMBL115448	EC50	'>'	10000	nM		transactivation			CV-1
CHEMBL116043	EC50	'='	338.84	nM		transactivation			CV-1
CHEMBL331798	EC50	'='	309.03	nM		transactivation			CV-1
CHEMBL326947	EC50	'='	3019.95	nM		transactivation			CV-1
CHEMBL113587	EC50	'>'	10000	nM		transactivation			CV-1
CHEMBL111841	EC50	'='	5623.41	nM		transactivation			CV-1
CHEMBL595	EC50	'='	588.84	nM		transactivation			CV-1
CHEMBL320553	EC50	'='	43.65	nM		transactivation			CV-1
CHEMBL104246	Ki	'='	158	nM		binding
CHEMBL105088	Ki	'='	620	nM		binding
CHEMBL318104	Ki	'='	850	nM		binding
CHEMBL104494	Ki	'='	280	nM		binding
CHEMBL321634	Ki	'='	52	nM		binding
CHEMBL104458	Ki	'='	2100	nM		binding
CHEMBL107794	Ki	'='	980	nM		binding
CHEMBL106666	Ki	'='	3.7	nM		binding
CHEMBL431448	Ki	'='	480	nM		binding
CHEMBL326668	Ki	'='	360	nM		binding
CHEMBL107741	Ki	'='	2600	nM		binding
CHEMBL107367	Ki	'='	1.1	nM		binding
CHEMBL595	Ki	'='	630	nM		binding
CHEMBL104850	Ki	'='	51	nM		binding
CHEMBL104850	Ki	'='	6.9	nM		binding
CHEMBL121	Ki	'='	120	nM		binding
CHEMBL108905	Ki	'='	194	nM		binding
CHEMBL319637	Ki	'='	1120	nM		binding
CHEMBL110283	Ki	'='	3149	nM		binding
CHEMBL430894	Ki	'='	110	nM		binding
CHEMBL110408	Ki	'='	110	nM		binding
CHEMBL110353	Ki	'='	1090	nM		binding
CHEMBL323773	Ki	'='	365	nM		binding
CHEMBL326015	Ki	'='	560	nM		binding
CHEMBL110295	Ki	'='	79	nM		binding
CHEMBL109161	Ki	'='	4600	nM		binding
CHEMBL421602	Ki	'='	47	nM		binding
CHEMBL324856	Ki	'='	38	nM		binding
CHEMBL106256	Ki	'='	3760	nM		binding
CHEMBL843	Ki	'='	14	nM		binding
CHEMBL379851	EC50	'>'	10000	nM		transactivation			HEK-293T
CHEMBL207957	EC50	'>'	10000	nM		transactivation			HEK-293T
CHEMBL208203	EC50	'>'	10000	nM		transactivation			HEK-293T
CHEMBL207811	EC50	'>'	10000	nM		transactivation			HEK-293T
CHEMBL379123	EC50	'='	1200	nM		transactivation			HEK-293T
CHEMBL377093	EC50	'>'	10000	nM		transactivation			HEK-293T
CHEMBL377883	EC50	'>'	10000	nM		transactivation			HEK-293T
CHEMBL210469	EC50	'>'	10000	nM		transactivation			HEK-293T
CHEMBL207570	EC50	'='	740	nM		transactivation			HEK-293T
CHEMBL207198	EC50	'>'	10000	nM		transactivation			HEK-293T
CHEMBL207887	EC50	'>'	10000	nM		transactivation			HEK-293T
CHEMBL206578	EC50	'>'	10000	nM		transactivation			HEK-293T
CHEMBL207569	EC50	'='	370	nM		transactivation			HEK-293T
CHEMBL383313	EC50	'>'	10000	nM		transactivation			HEK-293T
CHEMBL425945	EC50	'>'	10000	nM		transactivation			HEK-293T
CHEMBL207449	EC50	'>'	10000	nM		transactivation			HEK-293T
CHEMBL381066	EC50	'>'	10000	nM		transactivation			HEK-293T
CHEMBL208202	EC50	'>'	10000	nM		transactivation			HEK-293T
CHEMBL383404	EC50	'>'	10000	nM		transactivation			HEK-293T
CHEMBL208755	EC50	'>'	10000	nM		transactivation			HEK-293T
CHEMBL377695	EC50	'>'	10000	nM		transactivation			HEK-293T
CHEMBL211047	EC50	'>'	10000	nM		transactivation			HEK-293T
CHEMBL206895	EC50	'>'	10000	nM		transactivation			HEK-293T
CHEMBL207318	EC50	'>'	10000	nM		transactivation			HEK-293T
CHEMBL208318	EC50	'>'	10000	nM		transactivation			HEK-293T
CHEMBL210873	EC50	'>'	10000	nM		transactivation			HEK-293T
CHEMBL379145	EC50	'>'	10000	nM		transactivation			HEK-293T
CHEMBL418874	IC50	'='	30	nM		binding
CHEMBL120570	IC50	'='	37	nM		binding
CHEMBL280293	IC50	'='	450	nM		binding
CHEMBL118169	IC50	'='	63	nM		binding
CHEMBL122418	IC50	'='	59	nM		binding
CHEMBL118251	IC50	'='	640	nM		binding
CHEMBL118753	IC50	'='	85	nM		binding
CHEMBL117578	IC50	'='	144	nM		binding
CHEMBL332018	IC50	'='	540	nM		binding
CHEMBL122417	IC50	'='	340	nM		binding
CHEMBL331071	IC50	'='	19	nM		binding
CHEMBL118756	IC50	'='	490	nM		binding
CHEMBL117918	IC50	'='	750	nM		binding
CHEMBL119066	IC50	'='	1760	nM		binding
CHEMBL117165	IC50	'='	1060	nM		binding
CHEMBL117738	IC50	'='	150	nM		binding
CHEMBL419768	IC50	'='	1160	nM		binding
CHEMBL94306	IC50	'='	57	nM		binding
CHEMBL116774	IC50	'='	180	nM		binding
CHEMBL119496	IC50	'='	64	nM		binding
CHEMBL369053	Ki	'='	100	nM		binding
CHEMBL172492	Ki	'='	13	nM		binding
CHEMBL175213	Ki	'='	498	nM		binding
CHEMBL173494	Ki	'='	34	nM		binding
CHEMBL172718	Ki	'='	662	nM		binding
CHEMBL435523	Ki	'='	3.1	nM		binding
CHEMBL435704	Ki	'='	32	nM		binding
CHEMBL172490	Ki	'='	22	nM		binding
CHEMBL176421	Ki	'='	348	nM		binding
CHEMBL172959	Ki	'='	152	nM		binding
CHEMBL369607	Ki	'='	20	nM		binding
CHEMBL368371	Ki	'='	17	nM		binding
CHEMBL263029	Ki	'='	2.4	nM		binding
CHEMBL173236	Ki	'='	616	nM		binding
CHEMBL367002	Ki	'>'	5300	nM		binding
CHEMBL172931	Ki	'='	8.9	nM		binding
CHEMBL368931	Ki	'='	1330	nM		binding
CHEMBL367019	Ki	'='	11	nM		binding
CHEMBL367311	Ki	'='	30	nM		binding
CHEMBL173386	Ki	'='	52	nM		binding
CHEMBL173409	Ki	'='	52	nM		binding
CHEMBL175332	Ki	'='	145	nM		binding
CHEMBL427299	Ki	'='	304	nM		binding
CHEMBL173159	Ki	'='	20	nM		binding
CHEMBL174764	Ki	'='	41	nM		binding
CHEMBL177089	Ki	'='	115	nM		binding
CHEMBL368793	Ki	'='	448	nM		binding
CHEMBL435715	Ki	'='	26	nM		binding
CHEMBL173285	Ki	'='	32	nM		binding
CHEMBL121	Ki	'='	136	nM		binding
CHEMBL183213	Fold activation	'='	4	fold		transactivation	rosiglitazone	28	Not Mentioned
CHEMBL180633	Fold activation	'='	5	fold		transactivation	rosiglitazone	28	Not Mentioned
CHEMBL361351	Fold activation	'='	6	fold		transactivation	rosiglitazone	28	Not Mentioned
CHEMBL183502	Fold activation	'='	22	fold		transactivation	rosiglitazone	28	Not Mentioned
CHEMBL180430	Fold activation	'='	3	fold		transactivation	rosiglitazone	28	Not Mentioned
CHEMBL361773	Fold activation	'='	14	fold		transactivation	rosiglitazone	28	Not Mentioned
CHEMBL182583	Fold activation	'='	13	fold		transactivation	rosiglitazone	28	Not Mentioned
CHEMBL183667	Fold activation	'='	6	fold		transactivation	rosiglitazone	28	Not Mentioned
CHEMBL361617	Fold activation	'='	5	fold		transactivation	rosiglitazone	28	Not Mentioned
CHEMBL182941	Fold activation	'='	11	fold		transactivation	rosiglitazone	28	Not Mentioned
CHEMBL121	Fold activation	'='	28	fold		transactivation	rosiglitazone	28	Not Mentioned
CHEMBL183191	Fold activation	'='	4	fold		transactivation	rosiglitazone	28	Not Mentioned
CHEMBL183909	Fold activation	'='	2	fold		transactivation	rosiglitazone	28	Not Mentioned
CHEMBL180019	IC50	'='	3000	nM		binding
CHEMBL180123	IC50	'>'	15000	nM		binding
CHEMBL367891	IC50	'='	3800	nM		binding
CHEMBL176222	IC50	'='	3700	nM		binding
CHEMBL178909	IC50	'='	4500	nM		binding
CHEMBL367549	IC50	'='	4300	nM		binding
CHEMBL424957	IC50	'='	4300	nM		binding
CHEMBL447190	IC50	'='	2800	nM		binding
CHEMBL112725	IC50	'='	260	nM		binding
CHEMBL179657	IC50	'>'	15000	nM		binding
CHEMBL178659	IC50	'='	5700	nM		binding
CHEMBL176075	IC50	'='	1400	nM		binding
CHEMBL361166	IC50	'='	2900	nM		binding
CHEMBL180928	IC50	'='	2700	nM		binding
CHEMBL369289	IC50	'>'	15000	nM		binding
CHEMBL360231	IC50	'='	2000	nM		binding
CHEMBL426592	IC50	'>'	15000	nM		binding
CHEMBL179180	IC50	'='	990	nM		binding
CHEMBL360992	IC50	'>'	15000	nM		binding
CHEMBL179622	IC50	'='	1800	nM		binding
CHEMBL435343	IC50	'='	2900	nM		binding
CHEMBL180912	IC50	'='	4100	nM		binding
CHEMBL360919	IC50	'>'	15000	nM		binding
CHEMBL182200	IC50	'='	6400	nM		binding
CHEMBL179452	IC50	'='	5800	nM		binding
CHEMBL178630	IC50	'>'	15000	nM		binding
CHEMBL360240	IC50	'='	6000	nM		binding
CHEMBL178309	IC50	'='	5000	nM		binding
CHEMBL361424	IC50	'='	2600	nM		binding
CHEMBL178513	IC50	'>'	15000	nM		binding
CHEMBL360246	IC50	'='	900	nM		binding
CHEMBL369725	IC50	'='	15000	nM		binding
CHEMBL1082079	Activity				Not Active	transactivation	ciglitazone	100	Not Mentioned
CHEMBL1080469	Activity				Not Active	transactivation	ciglitazone	100	Not Mentioned
CHEMBL1079944	Activity				Not Active	transactivation	ciglitazone	100	Not Mentioned
CHEMBL1254673	Activity				Not Active	transactivation	ciglitazone	100	Not Mentioned
CHEMBL1254756	Activity				Not Active	transactivation	ciglitazone	100	Not Mentioned
CHEMBL1254672	Activity				Not Active	transactivation	ciglitazone	100	Not Mentioned
CHEMBL1081354	Activity				Not Active	transactivation	ciglitazone	100	Not Mentioned
CHEMBL1080470	Activity				Not Active	transactivation	ciglitazone	100	Not Mentioned
CHEMBL1785047	Emax				Not Active	transactivation	rosiglitazone	100	U2OS
CHEMBL1784944	Emax	'='	79	%		transactivation	rosiglitazone	100	U2OS
CHEMBL1784949	Emax	'='	141	%		transactivation	rosiglitazone	100	U2OS
CHEMBL1785046	Emax				Not Active	transactivation	rosiglitazone	100	U2OS
CHEMBL1784945	Emax	'='	74	%		transactivation	rosiglitazone	100	U2OS
CHEMBL1784954	Emax	'='	35	%		transactivation	rosiglitazone	100	U2OS
CHEMBL1784948	Emax	'='	134	%		transactivation	rosiglitazone	100	U2OS
CHEMBL121	Emax	'='	100	%		transactivation	rosiglitazone	100	U2OS
CHEMBL1813203	EC50	'='	6900	nM		transactivation			HEK293
CHEMBL1813199	EC50	'='	7900	nM		transactivation			HEK293
CHEMBL1813201	EC50	'='	12000	nM		transactivation			HEK293
CHEMBL1813194	EC50	'='	11000	nM		transactivation			HEK293
CHEMBL1813204	EC50	'='	5200	nM		transactivation			HEK293
CHEMBL1813200	EC50	'='	7100	nM		transactivation			HEK293
CHEMBL1813197	EC50	'='	9300	nM		transactivation			HEK293
CHEMBL1813196	EC50	'='	8500	nM		transactivation			HEK293
CHEMBL1813198	EC50	'='	6900	nM		transactivation			HEK293
CHEMBL1813195	EC50	'='	17000	nM		transactivation			HEK293
CHEMBL1813202	EC50	'='	3200	nM		transactivation			HEK293
CHEMBL1813192	EC50	'='	12000	nM		transactivation			HEK293
CHEMBL1783068	EC50	'='	15.3	nM		transactivation			HepG2
CHEMBL121	EC50	'='	10	nM		transactivation			HepG2
CHEMBL1783070	EC50	'='	224	nM		transactivation			HepG2
CHEMBL400989	EC50	'='	190	nM		transactivation			NIH3T3
CHEMBL400956	EC50	'='	150	nM		transactivation			NIH3T3
CHEMBL250822	EC50	'>'	10000	nM		transactivation			NIH3T3
CHEMBL250277	EC50	'='	150	nM		transactivation			NIH3T3
CHEMBL250276	EC50	'='	25	nM		transactivation			NIH3T3
CHEMBL249239	EC50	'='	300	nM		transactivation			NIH3T3
CHEMBL249045	EC50	'='	660	nM		transactivation			NIH3T3
CHEMBL248660	EC50	'='	80	nM		transactivation			NIH3T3
CHEMBL248848	EC50	'='	50	nM		transactivation			NIH3T3
CHEMBL399269	EC50	'>'	10000	nM		transactivation			NIH3T3
CHEMBL429661	EC50	'='	70	nM		transactivation			NIH3T3
CHEMBL401388	EC50	'='	250	nM		transactivation			NIH3T3
CHEMBL249225	EC50	'>'	10000	nM		transactivation			NIH3T3
CHEMBL399661	EC50	'='	20	nM		transactivation			NIH3T3
CHEMBL250647	EC50	'='	140	nM		transactivation			NIH3T3
CHEMBL401841	EC50	'='	30	nM		transactivation			NIH3T3
CHEMBL400955	EC50	'='	200	nM		transactivation			NIH3T3
CHEMBL249439	EC50	'='	50	nM		transactivation			NIH3T3
CHEMBL249438	EC50	'='	840	nM		transactivation			NIH3T3
CHEMBL401092	EC50	'='	1500	nM		transactivation			NIH3T3
CHEMBL248663	EC50	'='	15	nM		transactivation			NIH3T3
CHEMBL249833	EC50	'='	80	nM		transactivation			NIH3T3
CHEMBL250278	EC50	'='	40	nM		transactivation			NIH3T3
CHEMBL399847	EC50	'='	30	nM		transactivation			NIH3T3
CHEMBL249442	EC50	'='	70	nM		transactivation			NIH3T3
CHEMBL248850	EC50	'>'	1000	nM		transactivation			NIH3T3
CHEMBL400351	EC50	'='	200	nM		transactivation			NIH3T3
CHEMBL250223	EC50	'='	300	nM		transactivation			NIH3T3
CHEMBL398424	EC50	'='	200	nM		transactivation			NIH3T3
CHEMBL404004	EC50	'='	90	nM		transactivation			NIH3T3
CHEMBL121	EC50	'='	320	nM		transactivation			NIH3T3
CHEMBL513145	FC	'='	3.4	fold		transactivation	rosiglitazone	11.6	HepG2
CHEMBL512789	FC	'='	4.2	fold		transactivation	rosiglitazone	11.6	HepG2
CHEMBL466952	FC	'='	3.2	fold		transactivation	rosiglitazone	11.6	HepG2
CHEMBL467349	FC	'='	3.9	fold		transactivation	rosiglitazone	11.6	HepG2
CHEMBL513916	FC	'='	1.6	fold		transactivation	rosiglitazone	11.6	HepG2
CHEMBL467369	FC	'='	1.8	fold		transactivation	rosiglitazone	11.6	HepG2
CHEMBL121	FC	'='	11.6	fold		transactivation	rosiglitazone	11.6	HepG2
CHEMBL512084	FC	'='	11.4	fold		transactivation	rosiglitazone	11.6	HepG2
CHEMBL515003	FC	'='	1.6	fold		transactivation	rosiglitazone	11.6	HepG2
CHEMBL468160	FC	'='	8.9	fold		transactivation	rosiglitazone	11.6	HepG2
CHEMBL468159	FC	'='	11.5	fold		transactivation	rosiglitazone	11.6	HepG2
CHEMBL481551	FC	'='	12.7	fold		transactivation	rosiglitazone	11.6	HepG2
CHEMBL476719	FC	'='	1.5	fold		transactivation	rosiglitazone	11.6	HepG2
CHEMBL514054	FC	'='	1.5	fold		transactivation	rosiglitazone	11.6	HepG2
CHEMBL145824	EC50	'='	17.38	nM		transactivation			CV-1
CHEMBL149780	EC50	'='	8.318	nM		transactivation			CV-1
CHEMBL149309	EC50	'='	9332.54	nM		transactivation			CV-1
CHEMBL106666	EC50	'='	0.7079	nM		transactivation			CV-1
CHEMBL149147	EC50	'='	7585.78	nM		transactivation			CV-1
CHEMBL342990	EC50	'='	4073.8	nM		transactivation			CV-1
CHEMBL146687	EC50	'='	562.34	nM		transactivation			CV-1
CHEMBL148384	EC50	'='	1.479	nM		transactivation			CV-1
CHEMBL147282	EC50	'='	758.58	nM		transactivation			CV-1
CHEMBL148300	EC50	'='	0.912	nM		transactivation			CV-1
CHEMBL148668	EC50	'='	0.5754	nM		transactivation			CV-1
CHEMBL149381	EC50	'='	32.36	nM		transactivation			CV-1
CHEMBL146355	EC50	'='	9.333	nM		transactivation			CV-1
CHEMBL147419	EC50	'='	32.36	nM		transactivation			CV-1
CHEMBL344776	EC50	'='	416.87	nM		transactivation			CV-1
CHEMBL2112020	EC50	'='	15.14	nM		transactivation			CV-1
CHEMBL146584	EC50	'='	45.71	nM		transactivation			CV-1
CHEMBL347788	EC50	'='	8.913	nM		transactivation			CV-1
CHEMBL146530	EC50	'='	24.55	nM		transactivation			CV-1
CHEMBL359333	EC50	'='	229.09	nM		transactivation			CV-1
CHEMBL359150	EC50	'='	407.38	nM		transactivation			CV-1
CHEMBL149714	EC50	'='	18.2	nM		transactivation			CV-1
CHEMBL2112871	EC50	'='	2.884	nM		transactivation			CV-1
CHEMBL145886	EC50	'='	117.49	nM		transactivation			CV-1
CHEMBL146637	EC50	'='	11.75	nM		transactivation			CV-1
CHEMBL345541	EC50	'='	12.02	nM		transactivation			CV-1
CHEMBL145938	EC50	'='	208.93	nM		transactivation			CV-1
CHEMBL147770	EC50	'='	0.302	nM		transactivation			CV-1
CHEMBL146258	EC50	'='	89.13	nM		transactivation			CV-1
CHEMBL146217	EC50	'='	23.99	nM		transactivation			CV-1
CHEMBL148596	EC50	'='	2.63	nM		transactivation			CV-1
CHEMBL150215	EC50	'='	16.6	nM		transactivation			CV-1
CHEMBL356353	EC50	'='	4897.79	nM		transactivation			CV-1
CHEMBL2112870	EC50	'='	0.2818	nM		transactivation			CV-1
CHEMBL146579	EC50	'='	39.81	nM		transactivation			CV-1
CHEMBL2112021	EC50	'>'	10000	nM		transactivation			CV-1
CHEMBL414442	EC50	'='	0.912	nM		transactivation			CV-1
CHEMBL147021	EC50	'='	38.02	nM		transactivation			CV-1
CHEMBL146821	EC50	'='	7.762	nM		transactivation			CV-1
CHEMBL146562	EC50	'='	63.1	nM		transactivation			CV-1
CHEMBL150232	EC50	'='	8.511	nM		transactivation			CV-1
CHEMBL421781	EC50	'='	38.02	nM		transactivation			CV-1
CHEMBL107367	EC50	'='	0.3388	nM		transactivation			CV-1
CHEMBL38943	Activity	'='	37	%		transactivation	rosiglitazone	100	COS-7
CHEMBL213355	Activity	'='	100	%		transactivation	rosiglitazone	100	COS-7
CHEMBL211963	Activity	'='	71	%		transactivation	rosiglitazone	100	COS-7
CHEMBL212993	Activity	'='	105	%		transactivation	rosiglitazone	100	COS-7
CHEMBL214394	Activity	'='	65	%		transactivation	rosiglitazone	100	COS-7
CHEMBL373785	Activity	'='	90	%		transactivation	rosiglitazone	100	COS-7
CHEMBL425431	Activity	'='	62	%		transactivation	rosiglitazone	100	COS-7
CHEMBL153057	Activity	'='	79	%		transactivation	rosiglitazone	100	COS-7
CHEMBL264374	EC50	'='	60000	nM		transactivation			CV-1
CHEMBL306229	EC50	'='	66	nM		transactivation			CV-1
CHEMBL107367	EC50	'='	0.34	nM		transactivation			CV-1
CHEMBL435278	EC50	'='	2500	nM		transactivation			CV-1
CHEMBL153057	EC50	'='	5500	nM		transactivation			CV-1
CHEMBL293526	EC50	'='	83	nM		transactivation			CV-1
CHEMBL434063	EC50	'='	6.2	nM		transactivation			CV-1
CHEMBL320553	EC50	'='	44	nM		transactivation			CV-1
CHEMBL595	EC50	'='	580	nM		transactivation			CV-1
CHEMBL24458	EC50	'='	83	nM		transactivation			CV-1
CHEMBL121	EC50	'='	43	nM		transactivation			CV-1
CHEMBL106666	EC50	'='	0.71	nM		transactivation			CV-1
CHEMBL295416	EC50	'='	60000	nM		transactivation			CV-1
CHEMBL408	EC50	'='	550	nM		transactivation			CV-1
CHEMBL278590	EC50	'='	1000	nM		transactivation			CV-1
CHEMBL278994	EC50	'='	5.2	nM		transactivation			CV-1
CHEMBL172490	EC50	'='	27	nM		transactivation			COS-1
CHEMBL173386	EC50	'='	37	nM		transactivation			COS-1
CHEMBL369053	EC50	'='	193	nM		transactivation			COS-1
CHEMBL367019	EC50	'='	4	nM		transactivation			COS-1
CHEMBL174764	EC50	'='	100	nM		transactivation			COS-1
CHEMBL435715	EC50	'='	52	nM		transactivation			COS-1
CHEMBL173494	EC50	'='	75	nM		transactivation			COS-1
CHEMBL173285	EC50	'='	194	nM		transactivation			COS-1
CHEMBL172931	EC50	'='	485	nM		transactivation			COS-1
CHEMBL368371	EC50	'='	10	nM		transactivation			COS-1
CHEMBL263029	EC50	'='	2	nM		transactivation			COS-1
CHEMBL172959	EC50	'='	254	nM		transactivation			COS-1
CHEMBL367311	EC50	'='	60	nM		transactivation			COS-1
CHEMBL173409	EC50	'='	87	nM		transactivation			COS-1
CHEMBL175332	EC50	'='	156	nM		transactivation			COS-1
CHEMBL172492	EC50	'='	29	nM		transactivation			COS-1
CHEMBL173159	EC50	'='	20	nM		transactivation			COS-1
CHEMBL435523	EC50	'='	6	nM		transactivation			COS-1
CHEMBL369607	EC50	'='	16	nM		transactivation			COS-1
CHEMBL121	EC50	'='	21	nM		transactivation			COS-1
CHEMBL180311	Fold activation	'='	1.7	fold		transactivation	pioglitazone	6.9	COS-7
CHEMBL179853	Fold activation	'='	1.2	fold		transactivation	pioglitazone	6.9	COS-7
CHEMBL180400	Fold activation	'='	1.4	fold		transactivation	pioglitazone	6.9	COS-7
CHEMBL180078	Fold activation	'='	1.5	fold		transactivation	pioglitazone	6.9	COS-7
CHEMBL180083	Fold activation	'='	3.5	fold		transactivation	pioglitazone	6.9	COS-7
CHEMBL360281	Fold activation	'='	1.7	fold		transactivation	pioglitazone	6.9	COS-7
CHEMBL435688	Fold activation	'='	1.4	fold		transactivation	pioglitazone	6.9	COS-7
CHEMBL179789	Fold activation	'='	5.7	fold		transactivation	pioglitazone	6.9	COS-7
CHEMBL446177	Fold activation	'='	6	fold		transactivation	pioglitazone	6.9	COS-7
CHEMBL181175	Fold activation	'='	2	fold		transactivation	pioglitazone	6.9	COS-7
CHEMBL180338	Fold activation	'='	7.8	fold		transactivation	pioglitazone	6.9	COS-7
CHEMBL180696	Fold activation	'='	6.6	fold		transactivation	pioglitazone	6.9	COS-7
CHEMBL181198	Fold activation	'='	5.1	fold		transactivation	pioglitazone	6.9	COS-7
CHEMBL427140	Fold activation	'='	13.4	fold		transactivation	pioglitazone	6.9	COS-7
CHEMBL180898	Fold activation	'='	1.3	fold		transactivation	pioglitazone	6.9	COS-7
CHEMBL178235	Fold activation	'='	2.5	fold		transactivation	pioglitazone	6.9	COS-7
CHEMBL180395	Fold activation	'='	5.9	fold		transactivation	pioglitazone	6.9	COS-7
CHEMBL180820	Fold activation	'='	1.9	fold		transactivation	pioglitazone	6.9	COS-7
CHEMBL178244	Fold activation	'='	3.8	fold		transactivation	pioglitazone	6.9	COS-7
CHEMBL361004	Fold activation	'='	2.3	fold		transactivation	pioglitazone	6.9	COS-7
CHEMBL595	Fold activation	'='	6.9	fold		transactivation	pioglitazone	6.9	COS-7
CHEMBL367149	Fold activation	'='	1.2	fold		transactivation	pioglitazone	6.9	COS-7
CHEMBL210162	EC50	'='	50	nM		transactivation			NIH3T3
CHEMBL425605	EC50	'='	210	nM		transactivation			NIH3T3
CHEMBL379439	EC50	'='	220	nM		transactivation			NIH3T3
CHEMBL443051	EC50	'='	1000	nM		transactivation			NIH3T3
CHEMBL211674	EC50	'='	2500	nM		transactivation			NIH3T3
CHEMBL213547	EC50	'='	300	nM		transactivation			NIH3T3
CHEMBL214369	EC50	'>'	10000	nM		transactivation			NIH3T3
CHEMBL378399	EC50	'='	300	nM		transactivation			NIH3T3
CHEMBL413047	EC50	'>'	10000	nM		transactivation			NIH3T3
CHEMBL121	EC50	'='	320	nM		transactivation			NIH3T3
CHEMBL207442	IC50	'='	3000	nM		binding
CHEMBL210973	IC50	'='	270	nM		binding
CHEMBL23296	IC50	'='	195	nM		binding
CHEMBL383728	IC50	'='	1900	nM		binding
CHEMBL207103	IC50	'='	102	nM		binding
CHEMBL209563	IC50	'='	460	nM		binding
CHEMBL207907	IC50	'='	1200	nM		binding
CHEMBL210768	IC50	'='	280	nM		binding
CHEMBL427040	IC50	'='	4600	nM		binding
CHEMBL207019	IC50	'='	2900	nM		binding
CHEMBL1813205	Emax	'='	7	%		transactivation	ciglitazone	100	HEK293
CHEMBL1813189	Emax	'='	7	%		transactivation	ciglitazone	100	HEK293
CHEMBL1813187	Emax	'='	2	%		transactivation	ciglitazone	100	HEK293
CHEMBL1813192	Emax	'='	31	%		transactivation	ciglitazone	100	HEK293
CHEMBL1813198	Emax	'='	26	%		transactivation	ciglitazone	100	HEK293
CHEMBL1813197	Emax	'='	49	%		transactivation	ciglitazone	100	HEK293
CHEMBL1813195	Emax	'='	21	%		transactivation	ciglitazone	100	HEK293
CHEMBL1813196	Emax	'='	78	%		transactivation	ciglitazone	100	HEK293
CHEMBL1813203	Emax	'='	23	%		transactivation	ciglitazone	100	HEK293
CHEMBL1813200	Emax	'='	102	%		transactivation	ciglitazone	100	HEK293
CHEMBL1813204	Emax	'='	36	%		transactivation	ciglitazone	100	HEK293
CHEMBL1813191	Emax	'='	6	%		transactivation	ciglitazone	100	HEK293
CHEMBL1813188	Emax	'='	7	%		transactivation	ciglitazone	100	HEK293
CHEMBL1813190	Emax	'='	5	%		transactivation	ciglitazone	100	HEK293
CHEMBL1813201	Emax	'='	40	%		transactivation	ciglitazone	100	HEK293
CHEMBL1813202	Emax	'='	62	%		transactivation	ciglitazone	100	HEK293
CHEMBL1813199	Emax	'='	36	%		transactivation	ciglitazone	100	HEK293
CHEMBL1813194	Emax	'='	42	%		transactivation	ciglitazone	100	HEK293
CHEMBL1813193	Emax	'='	6	%		transactivation	ciglitazone	100	HEK293
CHEMBL1783066	IC50	'='	57	nM		binding	radio-labeled full agonist
CHEMBL23881	IC50	'='	580	nM		binding	radio-labeled full agonist
CHEMBL318684	IC50	'='	64	nM		binding	radio-labeled full agonist
CHEMBL1783032	IC50	'='	85	nM		binding	radio-labeled full agonist
CHEMBL206794	IC50	'='	981	nM		binding	radio-labeled full agonist
CHEMBL1783042	IC50	'='	150	nM		binding	radio-labeled full agonist
CHEMBL1783044	IC50	'='	735	nM		binding	radio-labeled full agonist
CHEMBL1783064	IC50	'='	1845	nM		binding	radio-labeled full agonist
CHEMBL1783038	IC50	'='	335	nM		binding	radio-labeled full agonist
CHEMBL1783041	IC50	'='	46	nM		binding	radio-labeled full agonist
CHEMBL1783058	IC50	'='	6440	nM		binding	radio-labeled full agonist
CHEMBL1783033	IC50	'='	48	nM		binding	radio-labeled full agonist
CHEMBL1783034	IC50	'='	76	nM		binding	radio-labeled full agonist
CHEMBL1783067	IC50	'='	180	nM		binding	radio-labeled full agonist
CHEMBL1783057	IC50	'='	78	nM		binding	radio-labeled full agonist
CHEMBL1783060	IC50	'='	540	nM		binding	radio-labeled full agonist
CHEMBL1783036	IC50	'='	195	nM		binding	radio-labeled full agonist
CHEMBL1783056	IC50	'='	1160	nM		binding	radio-labeled full agonist
CHEMBL1783053	IC50	'='	30	nM		binding	radio-labeled full agonist
CHEMBL1783048	IC50	'='	340	nM		binding	radio-labeled full agonist
CHEMBL1783049	IC50	'='	77	nM		binding	radio-labeled full agonist
CHEMBL25710	IC50	'='	300	nM		binding	radio-labeled full agonist
CHEMBL1783051	IC50	'='	300	nM		binding	radio-labeled full agonist
CHEMBL1783046	IC50	'='	73	nM		binding	radio-labeled full agonist
CHEMBL1783062	IC50	'='	750	nM		binding	radio-labeled full agonist
CHEMBL1783052	IC50	'='	450	nM		binding	radio-labeled full agonist
CHEMBL1783040	IC50	'='	291	nM		binding	radio-labeled full agonist
CHEMBL1783043	IC50	'='	226	nM		binding	radio-labeled full agonist
CHEMBL377508	IC50	'='	7690	nM		binding	radio-labeled full agonist
CHEMBL1783045	IC50	'='	59	nM		binding	radio-labeled full agonist
CHEMBL1783047	IC50	'='	1087	nM		binding	radio-labeled full agonist
CHEMBL1783035	IC50	'='	63	nM		binding	radio-labeled full agonist
CHEMBL1783039	IC50	'='	30	nM		binding	radio-labeled full agonist
CHEMBL121106	IC50	'='	210	nM		binding	radio-labeled full agonist
CHEMBL1783059	IC50	'='	180	nM		binding	radio-labeled full agonist
CHEMBL202739	IC50	'='	3610	nM		binding	radio-labeled full agonist
CHEMBL1783065	IC50	'='	1845	nM		binding	radio-labeled full agonist
CHEMBL1783054	IC50	'='	640	nM		binding	radio-labeled full agonist
CHEMBL1783055	IC50	'='	56	nM		binding	radio-labeled full agonist
CHEMBL1783037	IC50	'='	170	nM		binding	radio-labeled full agonist
CHEMBL1782067	IC50	'='	144	nM		binding	radio-labeled full agonist
CHEMBL23296	IC50	'='	140	nM		binding	radio-labeled full agonist
CHEMBL1783061	IC50	'='	1760	nM		binding	radio-labeled full agonist
CHEMBL279053	IC50	'='	110	nM		binding	radio-labeled full agonist
CHEMBL1783050	IC50	'='	490	nM		binding	radio-labeled full agonist
CHEMBL1783063	IC50	'='	1851	nM		binding	radio-labeled full agonist
CHEMBL1783031	IC50	'='	37	nM		binding	radio-labeled full agonist
CHEMBL331071	IC50	'='	19	nM		binding	radio-labeled full agonist
CHEMBL23670	IC50	'='	560	nM		binding	radio-labeled full agonist
CHEMBL278994	IC50	'='	94	nM		binding	radio-labeled full agonist
CHEMBL94306	IC50	'='	57	nM		binding	radio-labeled full agonist
CHEMBL1089826	EC50	'='	8900	nM		transactivation			COS-7
CHEMBL1091523	EC50	'='	6900	nM		transactivation			COS-7
CHEMBL1089158	EC50	'='	6800	nM		transactivation			COS-7
CHEMBL1090814	EC50	'='	13000	nM		transactivation			COS-7
CHEMBL1089825	EC50	'='	10800	nM		transactivation			COS-7
CHEMBL1090493	EC50	'='	9000	nM		transactivation			COS-7
CHEMBL455936	EC50	'='	6200	nM		transactivation			COS-7
CHEMBL1089827	EC50	'='	4500	nM		transactivation			COS-7
CHEMBL1091866	EC50	'='	7800	nM		transactivation			COS-7
CHEMBL1089467	EC50	'='	7300	nM		transactivation			COS-7
CHEMBL1089110	EC50	'='	7600	nM		transactivation			COS-7
CHEMBL518038	EC50	'='	3600	nM		transactivation			COS-7
CHEMBL1089317	EC50	'='	8900	nM		transactivation			COS-7
CHEMBL1090815	Activity				Not Active	transactivation			COS-7
CHEMBL295416	EC50	'='	53700	nM		transactivation			COS-7
CHEMBL595	EC50	'='	300	nM		transactivation			COS-7
CHEMBL1089210	EC50	'='	1321	nM		transactivation			HEK293
CHEMBL1092235	EC50	'='	843	nM		transactivation			HEK293
CHEMBL1092236	EC50	'='	1482	nM		transactivation			HEK293
CHEMBL1091196	EC50	'='	826	nM		transactivation			HEK293
CHEMBL1092237	EC50	'='	905	nM		transactivation			HEK293
CHEMBL1091218	EC50	'='	705	nM		transactivation			HEK293
CHEMBL1092931	EC50	'='	520	nM		transactivation			HEK293
CHEMBL1092932	EC50	'='	705	nM		transactivation			HEK293
CHEMBL1089501	EC50	'='	4100	nM		transactivation			HEK293
CHEMBL1089970	EC50	'='	417	nM		transactivation			HEK293
CHEMBL1091664	EC50	'='	2500	nM		transactivation			HEK293
CHEMBL1088911	EC50	'='	141.2	nM		transactivation			HEK293
CHEMBL1090212	EC50	'='	1411	nM		transactivation			HEK293
CHEMBL1090189	EC50	'='	1124	nM		transactivation			HEK293
CHEMBL1090877	EC50	'='	684	nM		transactivation			HEK293
CHEMBL1090878	EC50	'='	284	nM		transactivation			HEK293
CHEMBL1090211	EC50	'='	2901	nM		transactivation			HEK293
CHEMBL1090187	EC50	'='	20.1	nM		transactivation			HEK293
CHEMBL1088910	EC50	'='	41.5	nM		transactivation			HEK293
CHEMBL1089176	EC50	'='	75.4	nM		transactivation			HEK293
CHEMBL1089164	EC50	'='	1007	nM		transactivation			HEK293
CHEMBL1091980	EC50	'='	1100	nM		transactivation			HEK293
CHEMBL1089969	EC50	'='	398	nM		transactivation			HEK293
CHEMBL1090188	EC50	'='	3445	nM		transactivation			HEK293
CHEMBL1089500	EC50	'='	1257	nM		transactivation			HEK293
CHEMBL474551	IC50	'='	670	nM		binding
CHEMBL489506	IC50	'='	1350	nM		binding
CHEMBL473952	IC50	'='	140	nM		binding
CHEMBL474158	IC50	'='	3820	nM		binding
CHEMBL473953	IC50	'='	1670	nM		binding
CHEMBL514173	IC50	'='	750	nM		binding
CHEMBL514174	IC50	'='	10000	nM		binding
CHEMBL489507	IC50	'='	517	nM		binding
CHEMBL474157	IC50	'='	160	nM		binding
CHEMBL515106	IC50	'='	69	nM		binding
CHEMBL474148	IC50	'='	4740	nM		binding
CHEMBL514007	IC50	'='	2160	nM		binding
CHEMBL473961	IC50	'='	1670	nM		binding
CHEMBL491751	IC50	'='	5	nM		binding
CHEMBL474149	IC50	'='	70	nM		binding
CHEMBL474947	IC50	'='	712	nM		binding
CHEMBL514328	IC50	'='	890	nM		binding
CHEMBL474548	IC50	'='	1480	nM		binding
CHEMBL474550	IC50	'='	880	nM		binding
CHEMBL491750	IC50	'='	34	nM		binding
CHEMBL491142	IC50	'='	7	nM		binding
CHEMBL186179	EC50	'='	35	nM		binding
CHEMBL474157	EC50	'='	550	nM		transactivation			HEK293
CHEMBL514328	EC50	'='	4200	nM		transactivation			HEK293
CHEMBL491750	EC50	'='	560	nM		transactivation			HEK293
CHEMBL474158	EC50	'='	1570	nM		transactivation			HEK293
CHEMBL474148	EC50	'='	437	nM		transactivation			HEK293
CHEMBL514173	EC50	'='	7900	nM		transactivation			HEK293
CHEMBL491142	EC50	'='	13	nM		transactivation			HEK293
CHEMBL514007	EC50	'='	752	nM		transactivation			HEK293
CHEMBL473952	EC50	'='	23	nM		transactivation			HEK293
CHEMBL473953	EC50	'='	490	nM		transactivation			HEK293
CHEMBL474548	EC50	'='	9270	nM		transactivation			HEK293
CHEMBL474550	EC50	'='	5800	nM		transactivation			HEK293
CHEMBL489506	EC50	'='	7330	nM		transactivation			HEK293
CHEMBL489507	EC50	'='	3860	nM		transactivation			HEK293
CHEMBL473961	EC50	'='	2370	nM		transactivation			HEK293
CHEMBL474149	EC50	'='	156	nM		transactivation			HEK293
CHEMBL515106	EC50	'='	3790	nM		transactivation			HEK293
CHEMBL514174	EC50	'='	13600	nM		transactivation			HEK293
CHEMBL474551	EC50	'='	2190	nM		transactivation			HEK293
CHEMBL491751	EC50	'='	4	nM		transactivation			HEK293
CHEMBL474947	EC50	'='	9270	nM		transactivation			HEK293
CHEMBL487495	FC	'='	1.4	fold		transactivation	rosiglitazone	10.2	HepG2
CHEMBL508953	FC	'='	1.8	fold		transactivation	rosiglitazone	10.2	HepG2
CHEMBL487561	FC	'='	1	fold		transactivation	rosiglitazone	10.2	HepG2
CHEMBL487562	FC	'='	2.2	fold		transactivation	rosiglitazone	10.2	HepG2
CHEMBL487560	FC	'='	1	fold		transactivation	rosiglitazone	10.2	HepG2
CHEMBL489814	FC	'='	1.5	fold		transactivation	rosiglitazone	10.2	HepG2
CHEMBL448567	FC	'='	2.2	fold		transactivation	rosiglitazone	10.2	HepG2
CHEMBL505198	FC	'='	2.1	fold		transactivation	rosiglitazone	10.2	HepG2
CHEMBL522272	FC	'='	1.2	fold		transactivation	rosiglitazone	10.2	HepG2
CHEMBL490015	FC	'='	1.9	fold		transactivation	rosiglitazone	10.2	HepG2
CHEMBL121	FC	'='	10.2	fold		transactivation	rosiglitazone	10.2	HepG2
CHEMBL474550	Intrinsic activity	'='	21	%		transactivation	rosiglitazone	100	HEK293
CHEMBL474157	Intrinsic activity	'='	82	%		transactivation	rosiglitazone	100	HEK293
CHEMBL473961	Intrinsic activity	'='	72	%		transactivation	rosiglitazone	100	HEK293
CHEMBL489507	Intrinsic activity	'='	20	%		transactivation	rosiglitazone	100	HEK293
CHEMBL186179	Intrinsic activity	'='	107	%		transactivation	rosiglitazone	100	HEK293
CHEMBL474158	Intrinsic activity	'='	84	%		transactivation	rosiglitazone	100	HEK293
CHEMBL474148	Intrinsic activity	'='	19	%		transactivation	rosiglitazone	100	HEK293
CHEMBL474149	Intrinsic activity	'='	65	%		transactivation	rosiglitazone	100	HEK293
CHEMBL514173	Intrinsic activity	'='	19	%		transactivation	rosiglitazone	100	HEK293
CHEMBL491750	Intrinsic activity	'='	85	%		transactivation	rosiglitazone	100	HEK293
CHEMBL489506	Intrinsic activity	'='	23	%		transactivation	rosiglitazone	100	HEK293
CHEMBL514007	Intrinsic activity	'='	90	%		transactivation	rosiglitazone	100	HEK293
CHEMBL515106	Intrinsic activity	'='	70	%		transactivation	rosiglitazone	100	HEK293
CHEMBL474551	Intrinsic activity	'='	39	%		transactivation	rosiglitazone	100	HEK293
CHEMBL491142	Intrinsic activity	'='	86	%		transactivation	rosiglitazone	100	HEK293
CHEMBL514328	Intrinsic activity	'='	72	%		transactivation	rosiglitazone	100	HEK293
CHEMBL473952	Intrinsic activity	'='	76	%		transactivation	rosiglitazone	100	HEK293
CHEMBL474947	Intrinsic activity	'='	87	%		transactivation	rosiglitazone	100	HEK293
CHEMBL473953	Intrinsic activity	'='	39	%		transactivation	rosiglitazone	100	HEK293
CHEMBL474548	Intrinsic activity	'='	49	%		transactivation	rosiglitazone	100	HEK293
CHEMBL514174	Intrinsic activity	'='	21	%		transactivation	rosiglitazone	100	HEK293
CHEMBL491751	Intrinsic activity	'='	138	%		transactivation	rosiglitazone	100	HEK293
CHEMBL270960	EC50	'='	7000	nM		transactivation			HepG2
CHEMBL487561	Activity				Not Active	transactivation			HepG2
CHEMBL282686	EC50	'='	13	nM		transactivation			HepG2
CHEMBL485942	Activity				Not Active	transactivation			HepG2
CHEMBL520856	EC50	'='	15000	nM		transactivation			HepG2
CHEMBL495506	IC50	'>'	10000	nM		binding	radiolabeled ligand
CHEMBL497789	IC50	'='	3981.07	nM		binding	radiolabeled ligand
CHEMBL496136	IC50	'='	7943.28	nM		binding	radiolabeled ligand
CHEMBL496726	IC50	'='	3981.07	nM		binding	radiolabeled ligand
CHEMBL496933	IC50	'='	5011.87	nM		binding	radiolabeled ligand
CHEMBL495904	IC50	'='	1995.26	nM		binding	radiolabeled ligand
CHEMBL497991	IC50	'='	2511.89	nM		binding	radiolabeled ligand
CHEMBL522575	IC50	'='	2511.89	nM		binding	radiolabeled ligand
CHEMBL485088	IC50	'='	3981.07	nM		binding	radiolabeled ligand
CHEMBL38943	IC50	'='	6309.57	nM		binding	radiolabeled ligand
CHEMBL522224	IC50	'='	1000	nM		binding	radiolabeled ligand
CHEMBL524829	IC50	'='	6309.57	nM		binding	radiolabeled ligand
CHEMBL484266	IC50	'='	2511.89	nM		binding	radiolabeled ligand
CHEMBL496534	IC50	'='	794.33	nM		binding	radiolabeled ligand
CHEMBL522577	IC50	'='	3162.28	nM		binding	radiolabeled ligand
CHEMBL498608	IC50	'='	3162.28	nM		binding	radiolabeled ligand
CHEMBL496116	IC50	'='	7943.28	nM		binding	radiolabeled ligand
CHEMBL484467	IC50	'='	3981.07	nM		binding	radiolabeled ligand
CHEMBL520827	IC50	'='	5011.87	nM		binding	radiolabeled ligand
CHEMBL484466	IC50	'='	5011.87	nM		binding	radiolabeled ligand
CHEMBL523395	IC50	'='	7943.28	nM		binding	radiolabeled ligand
CHEMBL496744	IC50	'='	1995.26	nM		binding	radiolabeled ligand
CHEMBL498171	IC50	'='	2511.89	nM		binding	radiolabeled ligand
CHEMBL525552	IC50	'='	10000	nM		binding	radiolabeled ligand
CHEMBL498172	IC50	'='	1584.89	nM		binding	radiolabeled ligand
CHEMBL496733	IC50	'='	1995.26	nM		binding	radiolabeled ligand
CHEMBL485087	IC50	'='	5011.87	nM		binding	radiolabeled ligand
CHEMBL519345	IC50	'='	6309.57	nM		binding	radiolabeled ligand
CHEMBL522619	IC50	'='	3162.28	nM		binding	radiolabeled ligand
CHEMBL484465	IC50	'>'	10000	nM		binding	radiolabeled ligand
CHEMBL523594	IC50	'='	5011.87	nM		binding	radiolabeled ligand
CHEMBL498401	IC50	'='	7943.28	nM		binding	radiolabeled ligand
CHEMBL525366	IC50	'='	1584.89	nM		binding	radiolabeled ligand
CHEMBL495905	IC50	'='	1258.93	nM		binding	radiolabeled ligand
CHEMBL496743	IC50	'='	3162.28	nM		binding	radiolabeled ligand
CHEMBL558083	IC50	'='	9	nM		binding
CHEMBL560160	IC50	'='	8	nM		binding
CHEMBL556073	IC50	'='	1	nM		binding
CHEMBL452051	IC50	'='	1	nM		binding
CHEMBL559567	IC50	'='	2	nM		binding
CHEMBL672	IC50	'>'	5000	nM		binding
CHEMBL549746	IC50	'='	4	nM		binding
CHEMBL564902	IC50	'='	17	nM		binding
CHEMBL121	IC50	'='	200	nM		binding
CHEMBL562864	IC50	'='	10	nM		binding
CHEMBL552240	IC50	'='	9	nM		binding
CHEMBL560830	IC50	'='	16	nM		binding
CHEMBL558083	IC50	'='	5	nM		binding
CHEMBL461571	IC50	'='	11	nM		binding
CHEMBL564036	IC50	'='	12	nM		binding
CHEMBL559567	max activation	'='	20	%		transactivation	rosiglitazone	100	COS-1
CHEMBL564036	max activation	'='	51	%		transactivation	rosiglitazone	100	COS-1
CHEMBL552240	max activation	'='	48	%		transactivation	rosiglitazone	100	COS-1
CHEMBL558083	max activation	'='	41	%		transactivation	rosiglitazone	100	COS-1
CHEMBL560160	max activation	'='	27	%		transactivation	rosiglitazone	100	COS-1
CHEMBL558083	max activation	'='	27	%		transactivation	rosiglitazone	100	COS-1
CHEMBL461571	max activation	'='	50	%		transactivation	rosiglitazone	100	COS-1
CHEMBL564902	max activation	'='	24	%		transactivation	rosiglitazone	100	COS-1
CHEMBL560830	max activation	'='	35	%		transactivation	rosiglitazone	100	COS-1
CHEMBL562864	max activation	'='	55	%		transactivation	rosiglitazone	100	COS-1
CHEMBL549746	max activation	'='	20	%		transactivation	rosiglitazone	100	COS-1
CHEMBL452051	max activation	'='	30	%		transactivation	rosiglitazone	100	COS-1
CHEMBL556073	max activation	'='	30	%		transactivation	rosiglitazone	100	COS-1
CHEMBL593087	IC50	'='	1600	nM		binding	[3H2]nTZD3		Escherichia coli
CHEMBL593801	IC50	'='	145	nM		binding	[3H2]nTZD3		Escherichia coli
CHEMBL477095	IC50	'='	185	nM		binding	[3H2]nTZD3		Escherichia coli
CHEMBL593320	IC50	'>'	70000	nM		binding	[3H2]nTZD3		Escherichia coli
CHEMBL595440	IC50	'='	14000	nM		binding	[3H2]nTZD3		Escherichia coli
CHEMBL593796	IC50	'='	5	nM		binding	[3H2]nTZD3		Escherichia coli
CHEMBL605088	IC50	'='	327	nM		binding	[3H2]nTZD3		Escherichia coli
CHEMBL605520	IC50	'='	18000	nM		binding	[3H2]nTZD3		Escherichia coli
CHEMBL594034	IC50	'='	3	nM		binding	[3H2]nTZD3		Escherichia coli
CHEMBL603538	IC50	'='	1600	nM		binding	[3H2]nTZD3		Escherichia coli
CHEMBL604491	IC50	'='	14000	nM		binding	[3H2]nTZD3		Escherichia coli
CHEMBL596544	IC50	'='	33000	nM		binding	[3H2]nTZD3		Escherichia coli
CHEMBL121	IC50	'='	274	nM		binding	[3H2]nTZD3		Escherichia coli
CHEMBL1080365	EC50	'='	980	nM		transactivation			HEK-293T
CHEMBL1080312	EC50	'>'	10000	nM		transactivation			HEK-293T
CHEMBL1080355	EC50	'>'	10000	nM		transactivation			HEK-293T
CHEMBL1080356	EC50	'>'	10000	nM		transactivation			HEK-293T
CHEMBL1075732	EC50	'='	600	nM		transactivation			HEK-293T
CHEMBL1079668	EC50	'>'	10000	nM		transactivation			HEK-293T
CHEMBL1082114	EC50	'>'	10000	nM		transactivation			HEK-293T
CHEMBL1081963	EC50	'>'	10000	nM		transactivation			HEK-293T
CHEMBL1081591	EC50	'>'	10000	nM		transactivation			HEK-293T
CHEMBL1079503	EC50	'>'	10000	nM		transactivation			HEK-293T
CHEMBL1080143	EC50	'>'	10000	nM		transactivation			HEK-293T
CHEMBL1081751	EC50	'>'	10000	nM		transactivation			HEK-293T
CHEMBL1080535	EC50	'>'	10000	nM		transactivation			HEK-293T
CHEMBL1075683	EC50	'>'	10000	nM		transactivation			HEK-293T
CHEMBL1081764	EC50	'>'	10000	nM		transactivation			HEK-293T
CHEMBL1079910	EC50	'>'	10000	nM		transactivation			HEK-293T
CHEMBL1079961	EC50	'='	2560	nM		transactivation			HEK-293T
CHEMBL1079962	EC50	'='	4610	nM		transactivation			HEK-293T
CHEMBL1080140	EC50	'='	5870	nM		transactivation			HEK-293T
CHEMBL1080366	EC50	'>'	10000	nM		transactivation			HEK-293T
CHEMBL1079505	EC50	'>'	10000	nM		transactivation			HEK-293T
CHEMBL1081950	EC50	'='	5660	nM		transactivation			HEK-293T
CHEMBL1081003	EC50	'='	6360	nM		transactivation			HEK-293T
CHEMBL1079677	EC50	'>'	10000	nM		transactivation			HEK-293T
CHEMBL1079669	EC50	'='	1310	nM		transactivation			HEK-293T
CHEMBL1079821	EC50	'>'	10000	nM		transactivation			HEK-293T
CHEMBL1082118	EC50	'>'	10000	nM		transactivation			HEK-293T
CHEMBL1079982	EC50	'>'	10000	nM		transactivation			HEK-293T
CHEMBL1081410	EC50	'>'	10000	nM		transactivation			HEK-293T
CHEMBL1082115	EC50	'>'	10000	nM		transactivation			HEK-293T
CHEMBL1080699	EC50	'='	70000	nM		transactivation			HEK-293T
CHEMBL1079504	EC50	'>'	10000	nM		transactivation			HEK-293T
CHEMBL1075856	EC50	'>'	10000	nM		transactivation			HEK-293T
CHEMBL1080188	EC50	'>'	10000	nM		transactivation			HEK-293T
CHEMBL1081962	EC50	'>'	10000	nM		transactivation			HEK-293T
CHEMBL1079981	EC50	'>'	10000	nM		transactivation			HEK-293T
CHEMBL1079826	EC50	'>'	10000	nM		transactivation			HEK-293T
CHEMBL1082090	EC50	'>'	10000	nM		transactivation			HEK-293T
CHEMBL1081602	EC50	'>'	10000	nM		transactivation			HEK-293T
CHEMBL1080349	EC50	'>'	10000	nM		transactivation			HEK-293T
CHEMBL1080368	EC50	'>'	10000	nM		transactivation			HEK-293T
CHEMBL1081224	EC50	'>'	10000	nM		transactivation			HEK-293T
CHEMBL1080363	EC50	'>'	10000	nM		transactivation			HEK-293T
CHEMBL1075835	EC50	'>'	10000	nM		transactivation			HEK-293T
CHEMBL1080184	EC50	'>'	10000	nM		transactivation			HEK-293T
CHEMBL1075724	EC50	'='	1560	nM		transactivation			HEK-293T
CHEMBL1082116	EC50	'>'	10000	nM		transactivation			HEK-293T
CHEMBL1080025	EC50	'>'	10000	nM		transactivation			HEK-293T
CHEMBL1080026	EC50	'>'	10000	nM		transactivation			HEK-293T
CHEMBL1080361	EC50	'='	2300	nM		transactivation			HEK-293T
CHEMBL1080013	EC50	'>'	10000	nM		transactivation			HEK-293T
CHEMBL1081951	EC50	'>'	10000	nM		transactivation			HEK-293T
CHEMBL1082131	EC50	'>'	10000	nM		transactivation			HEK-293T
CHEMBL1081004	EC50	'>'	10000	nM		transactivation			HEK-293T
CHEMBL1075703	EC50	'>'	10000	nM		transactivation			HEK-293T
CHEMBL1075705	EC50	'>'	10000	nM		transactivation			HEK-293T
CHEMBL1081964	EC50	'>'	10000	nM		transactivation			HEK-293T
CHEMBL1075893	EC50	'>'	10000	nM		transactivation			HEK-293T
CHEMBL1075725	EC50	'>'	10000	nM		transactivation			HEK-293T
CHEMBL1079965	EC50	'>'	10000	nM		transactivation			HEK-293T
CHEMBL1075704	EC50	'>'	10000	nM		transactivation			HEK-293T
CHEMBL1081424	EC50	'>'	10000	nM		transactivation			HEK-293T
CHEMBL1081241	EC50	'>'	10000	nM		transactivation			HEK-293T
CHEMBL1079488	EC50	'>'	10000	nM		transactivation			HEK-293T
CHEMBL1079925	EC50	'>'	10000	nM		transactivation			HEK-293T
CHEMBL1081763	EC50	'>'	10000	nM		transactivation			HEK-293T
CHEMBL1082137	EC50	'>'	10000	nM		transactivation			HEK-293T
CHEMBL1079617	EC50	'>'	10000	nM		transactivation			HEK-293T
CHEMBL279053	EC50	'='	100	nM		transactivation			HEK-293T
CHEMBL1081387	EC50	'>'	10000	nM		transactivation			HEK-293T
CHEMBL1079382	EC50	'>'	10000	nM		transactivation			HEK-293T
CHEMBL1081749	EC50	'>'	10000	nM		transactivation			HEK-293T
CHEMBL1076151	EC50	'>'	10000	nM		transactivation			HEK-293T
CHEMBL1080540	EC50	'>'	10000	nM		transactivation			HEK-293T
CHEMBL1081786	EC50	'='	6890	nM		transactivation			HEK-293T
CHEMBL1081756	EC50	'>'	10000	nM		transactivation			HEK-293T
CHEMBL1075772	EC50	'>'	10000	nM		transactivation			HEK-293T
CHEMBL1081750	EC50	'>'	10000	nM		transactivation			HEK-293T
CHEMBL1081601	EC50	'>'	10000	nM		transactivation			HEK-293T
CHEMBL1080708	EC50	'>'	10000	nM		transactivation			HEK-293T
CHEMBL1082089	EC50	'>'	10000	nM		transactivation			HEK-293T
CHEMBL1080369	EC50	'>'	10000	nM		transactivation			HEK-293T
CHEMBL1080873	EC50	'>'	10000	nM		transactivation			HEK-293T
CHEMBL1081223	EC50	'>'	10000	nM		transactivation			HEK-293T
CHEMBL1080534	EC50	'>'	10000	nM		transactivation			HEK-293T
CHEMBL1081044	EC50	'>'	10000	nM		transactivation			HEK-293T
CHEMBL1081917	EC50				Not Active	transactivation			HEK-293T
CHEMBL1079489	EC50	'>'	10000	nM		transactivation			HEK-293T
CHEMBL1080032	EC50	'>'	10000	nM		transactivation			HEK-293T
CHEMBL1080033	EC50	'>'	10000	nM		transactivation			HEK-293T
CHEMBL1081206	EC50	'>'	10000	nM		transactivation			HEK-293T
CHEMBL1081380	EC50	'>'	10000	nM		transactivation			HEK-293T
CHEMBL1080532	EC50	'>'	10000	nM		transactivation			HEK-293T
CHEMBL1079911	EC50	'>'	10000	nM		transactivation			HEK-293T
CHEMBL1080533	EC50	'>'	10000	nM		transactivation			HEK-293T
CHEMBL1076175	EC50	'>'	10000	nM		transactivation			HEK-293T
CHEMBL1079646	EC50	'>'	10000	nM		transactivation			HEK-293T
CHEMBL1079449	EC50	'>'	10000	nM		transactivation			HEK-293T
CHEMBL1079739	EC50	'>'	10000	nM		transactivation			HEK-293T
CHEMBL1080187	EC50	'>'	10000	nM		transactivation			HEK-293T
CHEMBL1075665	EC50	'>'	10000	nM		transactivation			HEK-293T
CHEMBL1081391	EC50	'>'	10000	nM		transactivation			HEK-293T
CHEMBL1080172	EC50	'>'	10000	nM		transactivation			HEK-293T
CHEMBL1081045	EC50	'>'	10000	nM		transactivation			HEK-293T
CHEMBL1081046	EC50	'>'	10000	nM		transactivation			HEK-293T
CHEMBL1081207	EC50	'>'	10000	nM		transactivation			HEK-293T
CHEMBL1075723	EC50	'='	1200	nM		transactivation			HEK-293T
CHEMBL1081730	EC50	'>'	10000	nM		transactivation			HEK-293T
CHEMBL1080821	EC50	'>'	10000	nM		transactivation			HEK-293T
CHEMBL1081949	EC50	'>'	10000	nM		transactivation			HEK-293T
CHEMBL1081603	EC50	'>'	10000	nM		transactivation			HEK-293T
CHEMBL1075682	EC50	'>'	10000	nM		transactivation			HEK-293T
CHEMBL1081926	EC50	'>'	10000	nM		transactivation			HEK-293T
CHEMBL1081600	EC50	'>'	10000	nM		transactivation			HEK-293T
CHEMBL1081771	EC50	'>'	10000	nM		transactivation			HEK-293T
CHEMBL1079618	EC50	'>'	10000	nM		transactivation			HEK-293T
CHEMBL1081729	EC50	'>'	10000	nM		transactivation			HEK-293T
CHEMBL1079983	EC50	'>'	10000	nM		transactivation			HEK-293T
CHEMBL1079984	EC50	'>'	10000	nM		transactivation			HEK-293T
CHEMBL1080173	EC50	'>'	10000	nM		transactivation			HEK-293T
CHEMBL1082117	EC50	'>'	10000	nM		transactivation			HEK-293T
CHEMBL1075894	EC50	'='	2490	nM		transactivation			HEK-293T
CHEMBL1075836	EC50	'>'	10000	nM		transactivation			HEK-293T
CHEMBL1075895	EC50	'='	1030	nM		transactivation			HEK-293T
CHEMBL1080168	EC50	'>'	10000	nM		transactivation			HEK-293T
CHEMBL1080108	EC50	'>'	10000	nM		transactivation			HEK-293T
CHEMBL1075706	EC50	'>'	10000	nM		transactivation			HEK-293T
CHEMBL210469	EC50	'>'	10000	nM		transactivation			HEK-293T
CHEMBL590341	EC50				Not Active	transactivation			HepG2
CHEMBL591539	EC50	'='	1900	nM		transactivation			HepG2
CHEMBL589747	EC50	'='	700	nM		transactivation			HepG2
CHEMBL591348	EC50	'='	100	nM		transactivation			HepG2
CHEMBL592054	EC50	'='	4	nM		transactivation			HepG2
CHEMBL592234	EC50	'='	200	nM		transactivation			HepG2
CHEMBL589256	EC50	'='	200	nM		transactivation			HepG2
CHEMBL592236	EC50	'='	1000	nM		transactivation			HepG2
CHEMBL591534	EC50	'='	1400	nM		transactivation			HepG2
CHEMBL592235	EC50	'='	800	nM		transactivation			HepG2
CHEMBL603612	EC50	'='	1600	nM		transactivation			HepG2
CHEMBL591055	EC50	'='	1400	nM		transactivation			HepG2
CHEMBL606462	EC50	'='	2100	nM		transactivation			HepG2
CHEMBL591533	EC50	'='	1100	nM		transactivation			HepG2
CHEMBL591347	EC50	'='	200	nM		transactivation			HepG2
CHEMBL1090859	EC50	'='	10560	nM		transactivation			HEK293
CHEMBL1090861	EC50	'='	45230	nM		transactivation			HEK293
CHEMBL1090557	EC50	'>'	100000	nM		transactivation			HEK293
CHEMBL1089632	EC50	'='	2160	nM		transactivation			HEK293
CHEMBL410478	EC50	'='	2.7	nM		transactivation			HEK293
CHEMBL1089634	EC50	'='	2810	nM		transactivation			HEK293
CHEMBL1089177	EC50	'='	1140	nM		transactivation			HEK293
CHEMBL1089633	EC50	'='	32	nM		transactivation			HEK293
CHEMBL1090860	EC50	'='	50220	nM		transactivation			HEK293
CHEMBL121	EC50	'='	35	nM		transactivation			HEK293
CHEMBL478726	IC50	'='	26000	nM		binding	[3H]darglitazone
CHEMBL479001	IC50	'='	12000	nM		binding	[3H]darglitazone
CHEMBL515972	IC50	'='	28000	nM		binding	[3H]darglitazone
CHEMBL477318	IC50	'='	4000	nM		binding	[3H]darglitazone
CHEMBL478335	IC50	'='	587	nM		binding	[3H]darglitazone
CHEMBL513904	IC50	'='	2000	nM		binding	[3H]darglitazone
CHEMBL477940	IC50	'='	53000	nM		binding	[3H]darglitazone
CHEMBL476897	IC50	'='	2800	nM		binding	[3H]darglitazone
CHEMBL477323	IC50	'='	1600	nM		binding	[3H]darglitazone
CHEMBL479002	IC50	'='	255	nM		binding	[3H]darglitazone
CHEMBL477941	IC50	'='	12000	nM		binding	[3H]darglitazone
CHEMBL477094	IC50	'='	2600	nM		binding	[3H]darglitazone
CHEMBL478563	IC50	'>'	100000	nM		binding	[3H]darglitazone
CHEMBL516129	IC50	'>'	100000	nM		binding	[3H]darglitazone
CHEMBL477298	IC50	'='	2800	nM		binding	[3H]darglitazone
CHEMBL515181	IC50	'='	22000	nM		binding	[3H]darglitazone
CHEMBL476896	IC50	'='	2200	nM		binding	[3H]darglitazone
CHEMBL104850	IC50	'='	29	nM		binding	[3H]darglitazone
CHEMBL477690	IC50	'>'	50000	nM		binding	[3H]darglitazone
CHEMBL514696	IC50	'='	11000	nM		binding	[3H]darglitazone
CHEMBL478334	IC50	'='	3100	nM		binding	[3H]darglitazone
CHEMBL477095	IC50	'='	185	nM		binding	[3H]darglitazone
CHEMBL478725	IC50	'='	293	nM		binding	[3H]darglitazone
CHEMBL121	IC50	'='	274	nM		binding	[3H]darglitazone
CHEMBL455127	EC50	'='	3	nM		transactivation			COS
CHEMBL455130	EC50	'='	140	nM		transactivation			COS
CHEMBL517436	EC50	'='	23	nM		transactivation			COS
CHEMBL461379	EC50	'='	94	nM		transactivation			COS
CHEMBL509369	EC50	'='	156	nM		transactivation			COS
CHEMBL462378	EC50	'='	1	nM		transactivation			COS
CHEMBL507477	EC50	'='	3	nM		transactivation			COS
CHEMBL452054	EC50	'='	36	nM		transactivation			COS
CHEMBL452299	EC50	'='	2926	nM		transactivation			COS
CHEMBL460073	EC50	'='	2	nM		transactivation			COS
CHEMBL510180	EC50	'='	9	nM		transactivation			COS
CHEMBL455126	EC50	'='	27	nM		transactivation			COS
CHEMBL461944	EC50	'='	4	nM		transactivation			COS
CHEMBL461378	EC50	'='	4	nM		transactivation			COS
CHEMBL460072	EC50	'='	1	nM		transactivation			COS
CHEMBL509236	EC50	'='	2	nM		transactivation			COS
CHEMBL452051	EC50	'='	1	nM		transactivation			COS
CHEMBL518499	EC50	'='	4	nM		transactivation			COS
CHEMBL459466	EC50	'='	1	nM		transactivation			COS
CHEMBL518499	%max	'='	21	%		transactivation	rosiglitazone	100	COS
CHEMBL460072	%max	'='	29	%		transactivation	rosiglitazone	100	COS
CHEMBL455130	%max	'='	19	%		transactivation	rosiglitazone	100	COS
CHEMBL452054	%max	'='	36	%		transactivation	rosiglitazone	100	COS
CHEMBL462378	%max	'='	14	%		transactivation	rosiglitazone	100	COS
CHEMBL452299	%max	'='	23	%		transactivation	rosiglitazone	100	COS
CHEMBL461944	%max	'='	20	%		transactivation	rosiglitazone	100	COS
CHEMBL509236	%max	'='	27	%		transactivation	rosiglitazone	100	COS
CHEMBL461379	%max	'='	22	%		transactivation	rosiglitazone	100	COS
CHEMBL510180	%max	'='	35	%		transactivation	rosiglitazone	100	COS
CHEMBL455126	%max	'='	32	%		transactivation	rosiglitazone	100	COS
CHEMBL507477	%max	'='	47	%		transactivation	rosiglitazone	100	COS
CHEMBL459466	%max	'='	25	%		transactivation	rosiglitazone	100	COS
CHEMBL460073	%max	'='	23	%		transactivation	rosiglitazone	100	COS
CHEMBL461378	%max	'='	37	%		transactivation	rosiglitazone	100	COS
CHEMBL509369	%max	'='	19	%		transactivation	rosiglitazone	100	COS
CHEMBL455127	%max	'='	43	%		transactivation	rosiglitazone	100	COS
CHEMBL452051	%max	'='	24	%		transactivation	rosiglitazone	100	COS
CHEMBL517436	%max	'='	26	%		transactivation	rosiglitazone	100	COS
CHEMBL521925	Emax	'='	115	%		transactivation	rosiglitazone	100	CV-1
CHEMBL485291	Emax	'='	158	%		transactivation	rosiglitazone	100	CV-1
CHEMBL521289	Emax	'='	155	%		transactivation	rosiglitazone	100	CV-1
CHEMBL520305	Emax	'='	83	%		transactivation	rosiglitazone	100	CV-1
CHEMBL490426	Emax	'='	135	%		transactivation	rosiglitazone	100	CV-1
CHEMBL519857	Emax	'='	121	%		transactivation	rosiglitazone	100	CV-1
CHEMBL526740	Emax	'='	146	%		transactivation	rosiglitazone	100	CV-1
CHEMBL482827	Emax	'='	161	%		transactivation	rosiglitazone	100	CV-1
CHEMBL482823	Emax	'='	129	%		transactivation	rosiglitazone	100	CV-1
CHEMBL489766	Emax	'='	164	%		transactivation	rosiglitazone	100	CV-1
CHEMBL492046	Emax	'='	71	%		transactivation	rosiglitazone	100	CV-1
CHEMBL484263	Emax	'='	114	%		transactivation	rosiglitazone	100	CV-1
CHEMBL490832	Emax	'='	214	%		transactivation	rosiglitazone	100	CV-1
CHEMBL484063	Emax	'='	173	%		transactivation	rosiglitazone	100	CV-1
CHEMBL483035	Emax	'='	95	%		transactivation	rosiglitazone	100	CV-1
CHEMBL484462	Emax	'='	151	%		transactivation	rosiglitazone	100	CV-1
CHEMBL482824	Emax	'='	155	%		transactivation	rosiglitazone	100	CV-1
CHEMBL489559	Emax	'='	119	%		transactivation	rosiglitazone	100	CV-1
CHEMBL488991	Emax	'='	222	%		transactivation	rosiglitazone	100	CV-1
CHEMBL489765	Emax	'='	141	%		transactivation	rosiglitazone	100	CV-1
CHEMBL484264	Emax	'='	102	%		transactivation	rosiglitazone	100	CV-1
CHEMBL483032	Emax	'='	158	%		transactivation	rosiglitazone	100	CV-1
CHEMBL490220	Emax	'='	163	%		transactivation	rosiglitazone	100	CV-1
CHEMBL492047	Emax	'='	106	%		transactivation	rosiglitazone	100	CV-1
CHEMBL491627	Emax	'='	141	%		transactivation	rosiglitazone	100	CV-1
CHEMBL501335	Emax	'='	136	%		transactivation	rosiglitazone	100	CV-1
CHEMBL490425	Emax	'='	160	%		transactivation	rosiglitazone	100	CV-1
CHEMBL523650	Emax	'='	167	%		transactivation	rosiglitazone	100	CV-1
CHEMBL521796	Emax	'='	135	%		transactivation	rosiglitazone	100	CV-1
CHEMBL121	Emax	'='	100	%		transactivation	rosiglitazone	100	CV-1
CHEMBL282686	Emax	'='	98	%		transactivation	rosiglitazone	100	CV-1
CHEMBL457	Emax	'='	79	%		transactivation	rosiglitazone	100	CV-1
CHEMBL489559	EC50	'='	25100	nM		transactivation			CV-1
CHEMBL501335	EC50	'='	10	nM		transactivation			CV-1
CHEMBL519857	EC50	'='	3190	nM		transactivation			CV-1
CHEMBL491627	EC50	'='	26	nM		transactivation			CV-1
CHEMBL484264	EC50	'='	41400	nM		transactivation			CV-1
CHEMBL484263	EC50	'='	1850	nM		transactivation			CV-1
CHEMBL484063	EC50	'='	6930	nM		transactivation			CV-1
CHEMBL483032	EC50	'='	1160	nM		transactivation			CV-1
CHEMBL121	EC50	'='	33	nM		transactivation			CV-1
CHEMBL521925	EC50	'='	220	nM		transactivation			CV-1
CHEMBL521289	EC50	'='	175	nM		transactivation			CV-1
CHEMBL488991	EC50	'='	2940	nM		transactivation			CV-1
CHEMBL490426	EC50	'='	46	nM		transactivation			CV-1
CHEMBL523650	EC50	'='	816	nM		transactivation			CV-1
CHEMBL490220	EC50	'='	28	nM		transactivation			CV-1
CHEMBL490832	EC50	'='	139	nM		transactivation			CV-1
CHEMBL485291	EC50	'='	2730	nM		transactivation			CV-1
CHEMBL520305	EC50	'='	38600	nM		transactivation			CV-1
CHEMBL526740	EC50	'='	40	nM		transactivation			CV-1
CHEMBL492047	EC50	'='	37400	nM		transactivation			CV-1
CHEMBL489766	EC50	'='	3290	nM		transactivation			CV-1
CHEMBL482827	EC50	'='	606	nM		transactivation			CV-1
CHEMBL482823	EC50	'='	1610	nM		transactivation			CV-1
CHEMBL521796	EC50	'='	1890	nM		transactivation			CV-1
CHEMBL482824	EC50	'='	279	nM		transactivation			CV-1
CHEMBL489765	EC50	'='	121	nM		transactivation			CV-1
CHEMBL484462	EC50	'='	740	nM		transactivation			CV-1
CHEMBL490425	EC50	'='	36	nM		transactivation			CV-1
CHEMBL483035	EC50	'='	28100	nM		transactivation			CV-1
CHEMBL492046	EC50	'='	25400	nM		transactivation			CV-1
CHEMBL282686	EC50	'='	704	nM		transactivation			CV-1
CHEMBL1171832	Activity	'='	32	%		transactivation	pioglitazone	100	COS-7
CHEMBL1171851	Activity				Not Active	transactivation	pioglitazone	100	COS-7
CHEMBL1172222	Activity	'='	31	%		transactivation	pioglitazone	100	COS-7
CHEMBL1171833	Activity				Not Active	transactivation	pioglitazone	100	COS-7
CHEMBL1170076	Emax	'='	62	%		transactivation	pioglitazone	100	COS-7
CHEMBL1172000	Emax	'='	127	%		transactivation	pioglitazone	100	COS-7
CHEMBL1172019	Emax	'='	71	%		transactivation	pioglitazone	100	COS-7
CHEMBL1170852	Emax	'='	115	%		transactivation	pioglitazone	100	COS-7
CHEMBL1173499	Emax	'='	57	%		transactivation	pioglitazone	100	COS-7
CHEMBL1172003	Emax	'='	59	%		transactivation	pioglitazone	100	COS-7
CHEMBL1171831	Emax	'='	65	%		transactivation	pioglitazone	100	COS-7
CHEMBL1171834	Emax	'='	71	%		transactivation	pioglitazone	100	COS-7
CHEMBL518507	Emax	'='	111	%		transactivation	pioglitazone	100	COS-7
CHEMBL461883	Emax	'='	61	%		transactivation	pioglitazone	100	COS-7
CHEMBL1173376	Emax	'='	63	%		transactivation	pioglitazone	100	COS-7
CHEMBL1172016	Emax	'='	55	%		transactivation	pioglitazone	100	COS-7
CHEMBL1172001	Emax	'='	79	%		transactivation	pioglitazone	100	COS-7
CHEMBL1170264	Emax	'='	112	%		transactivation	pioglitazone	100	COS-7
CHEMBL1172002	Emax	'='	69	%		transactivation	pioglitazone	100	COS-7
CHEMBL1172000	EC50	'='	12100	nM		transactivation			COS-7
CHEMBL461883	EC50	'='	8300	nM		transactivation			COS-7
CHEMBL1170076	EC50	'='	10400	nM		transactivation			COS-7
CHEMBL1171831	EC50	'='	7000	nM		transactivation			COS-7
CHEMBL1171834	EC50	'='	6600	nM		transactivation			COS-7
CHEMBL1173499	EC50	'='	6100	nM		transactivation			COS-7
CHEMBL1173376	EC50	'='	7500	nM		transactivation			COS-7
CHEMBL1170852	EC50	'='	10300	nM		transactivation			COS-7
CHEMBL1172001	EC50	'='	4300	nM		transactivation			COS-7
CHEMBL1172003	EC50	'='	8800	nM		transactivation			COS-7
CHEMBL1172019	EC50	'='	8900	nM		transactivation			COS-7
CHEMBL1172016	EC50	'='	10000	nM		transactivation			COS-7
CHEMBL1170264	EC50	'='	11000	nM		transactivation			COS-7
CHEMBL1172002	EC50	'='	11000	nM		transactivation			COS-7
CHEMBL518507	EC50	'='	3700	nM		transactivation			COS-7
CHEMBL1092387	EC50	'='	180	nM		transactivation			Not Mentioned
CHEMBL1092876	EC50	'='	11000	nM		transactivation			Not Mentioned
CHEMBL1092855	EC50	'='	1200	nM		transactivation			Not Mentioned
CHEMBL1092900	EC50	'='	6700	nM		transactivation			Not Mentioned
CHEMBL1091573	EC50				Not Active	transactivation			Not Mentioned
CHEMBL1092633	EC50	'='	6000	nM		transactivation			Not Mentioned
CHEMBL1091572	EC50	'='	770	nM		transactivation			Not Mentioned
CHEMBL1089859	EC50	'='	3800	nM		transactivation			Not Mentioned
CHEMBL1090550	EC50	'='	1600	nM		transactivation			Not Mentioned
CHEMBL1089121	EC50	'='	3800	nM		transactivation			Not Mentioned
CHEMBL1090549	EC50	'='	1700	nM		transactivation			Not Mentioned
CHEMBL1092634	EC50	'='	280	nM		transactivation			Not Mentioned
CHEMBL1092854	EC50	'='	3200	nM		transactivation			Not Mentioned
CHEMBL1090521	EC50	'='	220	nM		transactivation			Not Mentioned
CHEMBL1092559	EC50	'='	560	nM		transactivation			Not Mentioned
CHEMBL1090870	EC50	'='	2400	nM		transactivation			Not Mentioned
CHEMBL1091530	EC50	'='	4400	nM		transactivation			Not Mentioned
CHEMBL1089120	EC50	'='	2300	nM		transactivation			Not Mentioned
CHEMBL595	EC50	'='	88	nM		transactivation			Not Mentioned
CHEMBL121	EC50	'='	11	nM		transactivation			Not Mentioned
CHEMBL1173121	Activity	'='	23	%		transactivation	pioglitazone	100	COS-7
CHEMBL1173564	Activity	'='	22	%		transactivation	pioglitazone	100	COS-7
CHEMBL1098027	EC50	'='	8600	nM		transactivation			COS-7
CHEMBL1087589	EC50	'='	3600	nM		transactivation			COS-7
CHEMBL1087339	EC50	'='	10000	nM		transactivation			COS-7
CHEMBL1087584	EC50	'>'	10000	nM		transactivation			COS-7
CHEMBL1087588	EC50	'='	4800	nM		transactivation			COS-7
CHEMBL1087715	EC50	'='	9300	nM		transactivation			COS-7
CHEMBL1087460	EC50	'='	3300	nM		transactivation			COS-7
CHEMBL1093141	Activity				Not Active	binding	fluoromone
CHEMBL461378	IC50	'='	15	nM		binding	[3H]2AD-5075		Escherichia coli BL21
CHEMBL459466	IC50	'<'	1	nM		binding	[3H]2AD-5075		Escherichia coli BL21
CHEMBL455127	IC50	'='	5	nM		binding	[3H]2AD-5075		Escherichia coli BL21
CHEMBL462378	IC50	'='	2	nM		binding	[3H]2AD-5075		Escherichia coli BL21
CHEMBL460073	IC50	'='	2	nM		binding	[3H]2AD-5075		Escherichia coli BL21
CHEMBL455126	IC50	'='	66	nM		binding	[3H]2AD-5075		Escherichia coli BL21
CHEMBL452051	IC50	'='	1	nM		binding	[3H]2AD-5075		Escherichia coli BL21
CHEMBL517436	IC50	'='	22	nM		binding	[3H]2AD-5075		Escherichia coli BL21
CHEMBL509236	IC50	'='	4	nM		binding	[3H]2AD-5075		Escherichia coli BL21
CHEMBL509369	IC50	'='	54	nM		binding	[3H]2AD-5075		Escherichia coli BL21
CHEMBL452054	IC50	'='	25	nM		binding	[3H]2AD-5075		Escherichia coli BL21
CHEMBL461379	IC50	'='	23	nM		binding	[3H]2AD-5075		Escherichia coli BL21
CHEMBL455130	IC50	'='	106	nM		binding	[3H]2AD-5075		Escherichia coli BL21
CHEMBL461944	IC50	'='	3	nM		binding	[3H]2AD-5075		Escherichia coli BL21
CHEMBL518499	IC50	'='	3	nM		binding	[3H]2AD-5075		Escherichia coli BL21
CHEMBL460072	IC50	'='	1	nM		binding	[3H]2AD-5075		Escherichia coli BL21
CHEMBL510180	IC50	'='	16	nM		binding	[3H]2AD-5075		Escherichia coli BL21
CHEMBL507477	IC50	'='	10	nM		binding	[3H]2AD-5075		Escherichia coli BL21
CHEMBL452299	IC50	'='	726	nM		binding	[3H]2AD-5075		Escherichia coli BL21
CHEMBL228376	Fold change	'='	1	fold		transactivation	rosiglitazone	27.2	Not Mentioned
CHEMBL228375	Fold change	'='	0.9	fold		transactivation	rosiglitazone	27.2	Not Mentioned
CHEMBL389690	Fold change	'='	1.8	fold		transactivation	rosiglitazone	27.2	Not Mentioned
CHEMBL387927	Fold change	'='	1.4	fold		transactivation	rosiglitazone	27.2	Not Mentioned
CHEMBL228433	Fold change	'='	1.3	fold		transactivation	rosiglitazone	27.2	Not Mentioned
CHEMBL439552	Fold change	'='	1.1	fold		transactivation	rosiglitazone	27.2	Not Mentioned
CHEMBL121	Fold change	'='	27.2	fold		transactivation	rosiglitazone	27.2	Not Mentioned
CHEMBL229071	Fold change	'='	5.4	fold		transactivation	rosiglitazone	27.2	Not Mentioned
CHEMBL228266	Fold change	'='	0.8	fold		transactivation	rosiglitazone	27.2	Not Mentioned
CHEMBL228432	Fold change	'='	4.2	fold		transactivation	rosiglitazone	27.2	Not Mentioned
CHEMBL228377	Fold change	'='	1.3	fold		transactivation	rosiglitazone	27.2	Not Mentioned
CHEMBL228484	Fold change	'='	5.4	fold		transactivation	rosiglitazone	27.2	Not Mentioned
CHEMBL228483	Fold change	'='	1.9	fold		transactivation	rosiglitazone	27.2	Not Mentioned
CHEMBL228434	Fold change	'='	2.4	fold		transactivation	rosiglitazone	27.2	Not Mentioned
CHEMBL387926	Fold change	'='	1.2	fold		transactivation	rosiglitazone	27.2	Not Mentioned
CHEMBL491237	IC50	'='	20000	nM		binding	fluorescent pan PPAR agonist
CHEMBL489597	IC50	'='	44000	nM		binding	fluorescent pan PPAR agonist
CHEMBL523306	IC50	'='	13000	nM		binding	fluorescent pan PPAR agonist
CHEMBL491039	IC50	'='	40000	nM		binding	fluorescent pan PPAR agonist
CHEMBL1089501	EC50	'='	2400	nM		transactivation			HepG2
CHEMBL604479	Activity				Not Active	transactivation			Huh-7
CHEMBL596262	Activity				Not Active	transactivation			Huh-7
CHEMBL593960	Activity				Not Active	transactivation			Huh-7
CHEMBL606157	Activity				Not Active	transactivation			Huh-7
CHEMBL595124	Activity				Not Active	transactivation			Huh-7
CHEMBL1091512	FC	'='	2.3	fold		transactivation	pioglitazone (deduction)	5.74	HEK-293T
CHEMBL1091113	FC	'='	1.64	fold		transactivation	pioglitazone (deduction)	5.74	HEK-293T
CHEMBL1090763	FC	'='	1.91	fold		transactivation	pioglitazone (deduction)	5.74	HEK-293T
CHEMBL1093414	FC	'='	2.61	fold		transactivation	pioglitazone (deduction)	5.74	HEK-293T
CHEMBL1092834	FC	'='	2.58	fold		transactivation	pioglitazone (deduction)	5.74	HEK-293T
CHEMBL1093103	FC	'='	1.21	fold		transactivation	pioglitazone (deduction)	5.74	HEK-293T
CHEMBL1093404	FC	'='	0.44	fold		transactivation	pioglitazone (deduction)	5.74	HEK-293T
CHEMBL1093411	FC	'='	0.51	fold		transactivation	pioglitazone (deduction)	5.74	HEK-293T
CHEMBL1091508	FC	'='	0.79	fold		transactivation	pioglitazone (deduction)	5.74	HEK-293T
CHEMBL1092995	FC	'='	2.27	fold		transactivation	pioglitazone (deduction)	5.74	HEK-293T
CHEMBL1089756	FC	'='	1.64	fold		transactivation	pioglitazone (deduction)	5.74	HEK-293T
CHEMBL1090086	FC	'='	2.07	fold		transactivation	pioglitazone (deduction)	5.74	HEK-293T
CHEMBL1089762	FC	'='	1.63	fold		transactivation	pioglitazone (deduction)	5.74	HEK-293T
CHEMBL1091511	FC	'='	1.37	fold		transactivation	pioglitazone (deduction)	5.74	HEK-293T
CHEMBL1093410	FC	'='	1.09	fold		transactivation	pioglitazone (deduction)	5.74	HEK-293T
CHEMBL1093769	FC	'='	2.26	fold		transactivation	pioglitazone (deduction)	5.74	HEK-293T
CHEMBL1092015	FC	'='	2.17	fold		transactivation	pioglitazone (deduction)	5.74	HEK-293T
CHEMBL1091840	FC	'='	0.93	fold		transactivation	pioglitazone (deduction)	5.74	HEK-293T
CHEMBL1090762	FC	'='	0.99	fold		transactivation	pioglitazone (deduction)	5.74	HEK-293T
CHEMBL1093415	FC	'='	1.66	fold		transactivation	pioglitazone (deduction)	5.74	HEK-293T
CHEMBL1092998	FC	'='	2.65	fold		transactivation	pioglitazone (deduction)	5.74	HEK-293T
CHEMBL1091507	FC	'='	0.89	fold		transactivation	pioglitazone (deduction)	5.74	HEK-293T
CHEMBL1090443	FC	'='	4.59	fold		transactivation	pioglitazone (deduction)	5.74	HEK-293T
CHEMBL1090766	FC	'='	3.1	fold		transactivation	pioglitazone (deduction)	5.74	HEK-293T
CHEMBL1090085	FC	'='	1.65	fold		transactivation	pioglitazone (deduction)	5.74	HEK-293T
CHEMBL1091125	FC	'='	0.75	fold		transactivation	pioglitazone (deduction)	5.74	HEK-293T
CHEMBL1093768	FC	'='	1.83	fold		transactivation	pioglitazone (deduction)	5.74	HEK-293T
CHEMBL1090091	FC	'='	3.15	fold		transactivation	pioglitazone (deduction)	5.74	HEK-293T
CHEMBL1091505	FC	'='	0.33	fold		transactivation	pioglitazone (deduction)	5.74	HEK-293T
CHEMBL1091839	FC	'='	1.71	fold		transactivation	pioglitazone (deduction)	5.74	HEK-293T
CHEMBL1092997	FC	'='	1.64	fold		transactivation	pioglitazone (deduction)	5.74	HEK-293T
CHEMBL1088754	FC	'='	1.26	fold		transactivation	pioglitazone (deduction)	5.74	HEK-293T
CHEMBL1091506	FC	'='	1.86	fold		transactivation	pioglitazone (deduction)	5.74	HEK-293T
CHEMBL1089761	FC	'='	1.14	fold		transactivation	pioglitazone (deduction)	5.74	HEK-293T
CHEMBL1091114	FC	'='	0.98	fold		transactivation	pioglitazone (deduction)	5.74	HEK-293T
CHEMBL1093102	FC	'='	3.32	fold		transactivation	pioglitazone (deduction)	5.74	HEK-293T
CHEMBL1093405	FC	'='	2.8	fold		transactivation	pioglitazone (deduction)	5.74	HEK-293T
CHEMBL1087466	EC50	'='	6386	nM		transactivation			HEK293
CHEMBL1087587	EC50	'='	20690	nM		transactivation			HEK293
CHEMBL1088097	EC50	'='	5036	nM		transactivation			HEK293
CHEMBL1088098	EC50	'='	1692	nM		transactivation			HEK293
CHEMBL1088257	EC50	'='	1444	nM		transactivation			HEK293
CHEMBL1087471	EC50	'='	4692	nM		transactivation			HEK293
CHEMBL1087594	EC50	'>'	25000	nM		transactivation			HEK293
CHEMBL1088246	EC50	'='	710	nM		transactivation			HEK293
CHEMBL1097194	EC50	'='	4815	nM		transactivation			HEK293
CHEMBL1087581	EC50	'>'	25000	nM		transactivation			HEK293
CHEMBL1087582	EC50	'>'	25000	nM		transactivation			HEK293
CHEMBL1088099	EC50	'='	571	nM		transactivation			HEK293
CHEMBL1097193	EC50	'='	9193	nM		transactivation			HEK293
CHEMBL1097195	EC50	'='	15580	nM		transactivation			HEK293
CHEMBL1088515	EC50	'='	772	nM		transactivation			HEK293
CHEMBL1087467	EC50	'>'	8300	nM		transactivation			HEK293
CHEMBL1088114	EC50	'='	970	nM		transactivation			HEK293
CHEMBL1087712	EC50	'='	4018	nM		transactivation			HEK293
CHEMBL1087590	EC50	'='	3443	nM		transactivation			HEK293
CHEMBL1087593	EC50	'='	9288	nM		transactivation			HEK293
CHEMBL1087580	EC50	'>'	25000	nM		transactivation			HEK293
CHEMBL1087336	EC50	'>'	25000	nM		transactivation			HEK293
CHEMBL1089501	EC50	'='	4017	nM		transactivation			HEK293
CHEMBL1088114	Emax	'='	62	%		transactivation	rosiglitazone	100	HEK293
CHEMBL1088257	Emax	'='	74	%		transactivation	rosiglitazone	100	HEK293
CHEMBL1088097	Emax	'='	55	%		transactivation	rosiglitazone	100	HEK293
CHEMBL1087471	Emax	'='	35	%		transactivation	rosiglitazone	100	HEK293
CHEMBL1087712	Emax	'='	54	%		transactivation	rosiglitazone	100	HEK293
CHEMBL1097194	Emax	'='	34	%		transactivation	rosiglitazone	100	HEK293
CHEMBL1087587	Emax	'='	130	%		transactivation	rosiglitazone	100	HEK293
CHEMBL1088246	Emax	'='	58	%		transactivation	rosiglitazone	100	HEK293
CHEMBL1087590	Emax	'='	73	%		transactivation	rosiglitazone	100	HEK293
CHEMBL1087466	Emax	'='	54	%		transactivation	rosiglitazone	100	HEK293
CHEMBL1088515	Emax	'='	95	%		transactivation	rosiglitazone	100	HEK293
CHEMBL1087467	Emax	'='	189	%		transactivation	rosiglitazone	100	HEK293
CHEMBL1088098	Emax	'='	43	%		transactivation	rosiglitazone	100	HEK293
CHEMBL1087593	Emax	'='	84	%		transactivation	rosiglitazone	100	HEK293
CHEMBL1088099	Emax	'='	83	%		transactivation	rosiglitazone	100	HEK293
CHEMBL1097193	Emax	'='	46	%		transactivation	rosiglitazone	100	HEK293
CHEMBL1097195	Emax	'='	94	%		transactivation	rosiglitazone	100	HEK293
CHEMBL1089501	Emax	'='	82	%		transactivation	rosiglitazone	100	HEK293
CHEMBL477095	%max	'='	94	%		transactivation	rosiglitazone	84	HepG2
CHEMBL593087	%max	'='	82	%		transactivation	rosiglitazone	84	HepG2
CHEMBL593801	%max	'='	91	%		transactivation	rosiglitazone	84	HepG2
CHEMBL593796	%max	'='	88	%		transactivation	rosiglitazone	84	HepG2
CHEMBL605088	%max	'='	80	%		transactivation	rosiglitazone	84	HepG2
CHEMBL594034	%max	'='	103	%		transactivation	rosiglitazone	84	HepG2
CHEMBL604491	%max	'='	42	%		transactivation	rosiglitazone	84	HepG2
CHEMBL603538	%max	'='	56	%		transactivation	rosiglitazone	84	HepG2
CHEMBL121	%max	'='	84	%		transactivation	rosiglitazone	84	HepG2
CHEMBL558141	Activity	'='	82	%		transactivation	pioglitazone	100	COS-7
CHEMBL560205	Activity	'='	85	%		transactivation	pioglitazone	100	COS-7
CHEMBL561006	Activity	'='	54	%		transactivation	pioglitazone	100	COS-7
CHEMBL559752	Activity	'='	120	%		transactivation	pioglitazone	100	COS-7
CHEMBL563546	Activity	'='	91	%		transactivation	pioglitazone	100	COS-7
CHEMBL549723	Activity	'='	114	%		transactivation	pioglitazone	100	COS-7
CHEMBL551480	Activity	'='	77	%		transactivation	pioglitazone	100	COS-7
CHEMBL551420	Activity	'='	49	%		transactivation	pioglitazone	100	COS-7
CHEMBL564017	Activity	'='	68	%		transactivation	pioglitazone	100	COS-7
CHEMBL561544	Activity	'='	61	%		transactivation	pioglitazone	100	COS-7
CHEMBL562786	Activity	'='	77	%		transactivation	pioglitazone	100	COS-7
CHEMBL551479	Activity	'='	125	%		transactivation	pioglitazone	100	COS-7
CHEMBL558072	Activity	'='	107	%		transactivation	pioglitazone	100	COS-7
CHEMBL550332	Activity	'='	85	%		transactivation	pioglitazone	100	COS-7
CHEMBL552347	Activity	'='	83	%		transactivation	pioglitazone	100	COS-7
CHEMBL563351	Activity	'='	108	%		transactivation	pioglitazone	100	COS-7
CHEMBL560484	Activity	'='	96	%		transactivation	pioglitazone	100	COS-7
CHEMBL561284	Activity	'='	92	%		transactivation	pioglitazone	100	COS-7
CHEMBL557342	Activity	'='	87	%		transactivation	pioglitazone	100	COS-7
CHEMBL551884	Activity	'='	96	%		transactivation	pioglitazone	100	COS-7
CHEMBL573967	FC	'='	7.5	fold		transactivation	rosiglitazone	4.2	HEK293
CHEMBL572530	FC	'='	1.4	fold		transactivation	rosiglitazone	4.2	HEK293
CHEMBL575729	FC	'='	5.3	fold		transactivation	rosiglitazone	4.2	HEK293
CHEMBL573969	FC	'='	4.4	fold		transactivation	rosiglitazone	4.2	HEK293
CHEMBL584593	FC	'='	1.7	fold		transactivation	rosiglitazone	4.2	HEK293
CHEMBL577176	Activity				Not Active	transactivation	rosiglitazone	4.2	HEK293
CHEMBL575727	Activity				Not Active	transactivation	rosiglitazone	4.2	HEK293
CHEMBL583792	FC	'='	2	fold		transactivation	rosiglitazone	4.2	HEK293
CHEMBL575072	FC	'='	2.4	fold		transactivation	rosiglitazone	4.2	HEK293
CHEMBL489142	FC	'='	1.2	fold		transactivation	rosiglitazone	4.2	HEK293
CHEMBL572826	FC	'='	2.3	fold		transactivation	rosiglitazone	4.2	HEK293
CHEMBL572827	FC	'='	11.3	fold		transactivation	rosiglitazone	4.2	HEK293
CHEMBL582851	FC	'='	2.6	fold		transactivation	rosiglitazone	4.2	HEK293
CHEMBL575526	FC	'='	2.1	fold		transactivation	rosiglitazone	4.2	HEK293
CHEMBL294878	FC	'='	5	fold		transactivation	rosiglitazone	4.2	HEK293
CHEMBL573966	FC	'='	57.5	fold		transactivation	rosiglitazone	4.2	HEK293
CHEMBL583578	FC	'='	25.2	fold		transactivation	rosiglitazone	4.2	HEK293
CHEMBL9352	FC	'='	1.7	fold		transactivation	rosiglitazone	4.2	HEK293
CHEMBL583577	FC	'='	4.1	fold		transactivation	rosiglitazone	4.2	HEK293
CHEMBL574626	FC	'='	2.3	fold		transactivation	rosiglitazone	4.2	HEK293
CHEMBL578432	FC	'='	3.9	fold		transactivation	rosiglitazone	4.2	HEK293
CHEMBL585004	FC	'='	5.3	fold		transactivation	rosiglitazone	4.2	HEK293
CHEMBL583087	Activity				Not Active	transactivation	rosiglitazone	4.2	HEK293
CHEMBL575520	FC	'='	13.8	fold		transactivation	rosiglitazone	4.2	HEK293
CHEMBL583795	FC	'='	7.4	fold		transactivation	rosiglitazone	4.2	HEK293
CHEMBL13486	FC	'='	7.5	fold		transactivation	rosiglitazone	4.2	HEK293
CHEMBL572767	FC	'='	12.7	fold		transactivation	rosiglitazone	4.2	HEK293
CHEMBL242341	FC	'='	12.8	fold		transactivation	rosiglitazone	4.2	HEK293
CHEMBL243664	FC	'='	7.7	fold		transactivation	rosiglitazone	4.2	HEK293
CHEMBL399121	FC	'='	3.8	fold		transactivation	rosiglitazone	4.2	HEK293
CHEMBL575499	FC	'='	1.1	fold		transactivation	rosiglitazone	4.2	HEK293
CHEMBL573968	Activity				Not Active	transactivation	rosiglitazone	4.2	HEK293
CHEMBL575733	Activity				Not Active	transactivation	rosiglitazone	4.2	HEK293
CHEMBL575283	FC	'='	9.4	fold		transactivation	rosiglitazone	4.2	HEK293
CHEMBL575075	FC	'='	116.3	fold		transactivation	rosiglitazone	4.2	HEK293
CHEMBL484663	FC	'='	5	fold		transactivation	rosiglitazone	4.2	HEK293
CHEMBL575708	FC	'='	3	fold		transactivation	rosiglitazone	4.2	HEK293
CHEMBL192894	FC	'='	2.2	fold		transactivation	rosiglitazone	4.2	HEK293
CHEMBL573524	FC	'='	3.5	fold		transactivation	rosiglitazone	4.2	HEK293
CHEMBL222556	FC	'='	5	fold		transactivation	rosiglitazone	4.2	HEK293
CHEMBL182653	FC	'='	2.6	fold		transactivation	rosiglitazone	4.2	HEK293
CHEMBL90568	FC	'='	7.3	fold		transactivation	rosiglitazone	4.2	HEK293
CHEMBL150	FC	'='	3.5	fold		transactivation	rosiglitazone	4.2	HEK293
CHEMBL583378	FC	'='	147.8	fold		transactivation	rosiglitazone	4.2	HEK293
CHEMBL484662	FC	'='	8.9	fold		transactivation	rosiglitazone	4.2	HEK293
CHEMBL28	FC	'='	5.4	fold		transactivation	rosiglitazone	4.2	HEK293
CHEMBL129795	FC	'='	1.3	fold		transactivation	rosiglitazone	4.2	HEK293
CHEMBL475908	FC	'='	6.8	fold		transactivation	rosiglitazone	4.2	HEK293
CHEMBL239156	FC	'='	4.4	fold		transactivation	rosiglitazone	4.2	HEK293
CHEMBL44	FC	'='	3.4	fold		transactivation	rosiglitazone	4.2	HEK293
CHEMBL454746	FC	'='	10.5	fold		transactivation	rosiglitazone	4.2	HEK293
CHEMBL486176	FC	'='	38.5	fold		transactivation	rosiglitazone	4.2	HEK293
CHEMBL253786	FC	'='	6.3	fold		transactivation	rosiglitazone	4.2	HEK293
CHEMBL573523	FC	'='	2.1	fold		transactivation	rosiglitazone	4.2	HEK293
CHEMBL121	FC	'='	4.2	fold		transactivation	rosiglitazone	4.2	HEK293
CHEMBL50	FC	'='	1.3	fold		transactivation	rosiglitazone	4.2	HEK293
CHEMBL8145	FC	'='	9.6	fold		transactivation	rosiglitazone	4.2	HEK293
CHEMBL214321	FC	'='	2.2	fold		transactivation	rosiglitazone	4.2	HEK293
CHEMBL575073	FC	'='	1.6	fold		transactivation	rosiglitazone	4.2	HEK293
CHEMBL117	FC	'='	4	fold		transactivation	rosiglitazone	4.2	HEK293
CHEMBL582851	FC				Not Active	transactivation	rosiglitazone	2.9	HEK293
CHEMBL572767	FC	'='	5.3	fold		transactivation	rosiglitazone	2.9	HEK293
CHEMBL573967	FC	'='	2.3	fold		transactivation	rosiglitazone	2.9	HEK293
CHEMBL572827	FC	'='	7.1	fold		transactivation	rosiglitazone	2.9	HEK293
CHEMBL574626	FC	'='	2.2	fold		transactivation	rosiglitazone	2.9	HEK293
CHEMBL575526	FC	'='	1.8	fold		transactivation	rosiglitazone	2.9	HEK293
CHEMBL575072	FC	'='	1.1	fold		transactivation	rosiglitazone	2.9	HEK293
CHEMBL572826	FC	'='	1	fold		transactivation	rosiglitazone	2.9	HEK293
CHEMBL573523	FC	'='	1.15	fold		transactivation	rosiglitazone	2.9	HEK293
CHEMBL578432	FC	'='	2.25	fold		transactivation	rosiglitazone	2.9	HEK293
CHEMBL575729	FC	'='	1.25	fold		transactivation	rosiglitazone	2.9	HEK293
CHEMBL575708	FC	'='	1.75	fold		transactivation	rosiglitazone	2.9	HEK293
CHEMBL585004	FC	'='	2.2	fold		transactivation	rosiglitazone	2.9	HEK293
CHEMBL575520	FC	'='	2.9	fold		transactivation	rosiglitazone	2.9	HEK293
CHEMBL572530	FC	'='	1.5	fold		transactivation	rosiglitazone	2.9	HEK293
CHEMBL584593	FC	'='	1.7	fold		transactivation	rosiglitazone	2.9	HEK293
CHEMBL583087	Activity				Not Active	transactivation	rosiglitazone	2.9	HEK293
CHEMBL573969	FC	'='	4.7	fold		transactivation	rosiglitazone	2.9	HEK293
CHEMBL475908	FC	'='	2	fold		transactivation	rosiglitazone	2.9	HEK293
CHEMBL484662	FC	'='	2.5	fold		transactivation	rosiglitazone	2.9	HEK293
CHEMBL8145	FC	'='	1.2	fold		transactivation	rosiglitazone	2.9	HEK293
CHEMBL575283	FC	'='	3.4	fold		transactivation	rosiglitazone	2.9	HEK293
CHEMBL575075	FC	'='	11.9	fold		transactivation	rosiglitazone	2.9	HEK293
CHEMBL575499	FC	'='	1.1	fold		transactivation	rosiglitazone	2.9	HEK293
CHEMBL573968	Activity				Not Active	transactivation	rosiglitazone	2.9	HEK293
CHEMBL577176	Activity				Not Active	transactivation	rosiglitazone	2.9	HEK293
CHEMBL575727	Activity				Not Active	transactivation	rosiglitazone	2.9	HEK293
CHEMBL294878	FC	'='	1.3	fold		transactivation	rosiglitazone	2.9	HEK293
CHEMBL222556	FC	'='	1.6	fold		transactivation	rosiglitazone	2.9	HEK293
CHEMBL243664	FC	'='	2	fold		transactivation	rosiglitazone	2.9	HEK293
CHEMBL489142	FC	'='	1.9	fold		transactivation	rosiglitazone	2.9	HEK293
CHEMBL399121	FC	'='	1.5	fold		transactivation	rosiglitazone	2.9	HEK293
CHEMBL583792	FC	'='	1.4	fold		transactivation	rosiglitazone	2.9	HEK293
CHEMBL583795	FC	'='	2.5	fold		transactivation	rosiglitazone	2.9	HEK293
CHEMBL13486	FC	'='	1.8	fold		transactivation	rosiglitazone	2.9	HEK293
CHEMBL583577	FC	'='	1.8	fold		transactivation	rosiglitazone	2.9	HEK293
CHEMBL575733	Activity				Not Active	transactivation	rosiglitazone	2.9	HEK293
CHEMBL28	FC	'='	1.9	fold		transactivation	rosiglitazone	2.9	HEK293
CHEMBL573524	FC	'='	1.7	fold		transactivation	rosiglitazone	2.9	HEK293
CHEMBL575073	FC	'='	1	fold		transactivation	rosiglitazone	2.9	HEK293
CHEMBL486176	FC	'='	12.1	fold		transactivation	rosiglitazone	2.9	HEK293
CHEMBL182653	FC	'='	1.8	fold		transactivation	rosiglitazone	2.9	HEK293
CHEMBL129795	FC	'='	1.25	fold		transactivation	rosiglitazone	2.9	HEK293
CHEMBL253786	FC	'='	1.9	fold		transactivation	rosiglitazone	2.9	HEK293
CHEMBL242341	FC	'='	4.6	fold		transactivation	rosiglitazone	2.9	HEK293
CHEMBL239156	FC	'='	2.3	fold		transactivation	rosiglitazone	2.9	HEK293
CHEMBL214321	FC	'='	1.3	fold		transactivation	rosiglitazone	2.9	HEK293
CHEMBL50	FC	'='	1.2	fold		transactivation	rosiglitazone	2.9	HEK293
CHEMBL9352	FC	'='	1	fold		transactivation	rosiglitazone	2.9	HEK293
CHEMBL583378	FC	'='	20.6	fold		transactivation	rosiglitazone	2.9	HEK293
CHEMBL454746	FC	'='	2	fold		transactivation	rosiglitazone	2.9	HEK293
CHEMBL573966	FC	'='	9.1	fold		transactivation	rosiglitazone	2.9	HEK293
CHEMBL583578	FC	'='	8.7	fold		transactivation	rosiglitazone	2.9	HEK293
CHEMBL484663	FC	'='	1.7	fold		transactivation	rosiglitazone	2.9	HEK293
CHEMBL90568	FC	'='	2.5	fold		transactivation	rosiglitazone	2.9	HEK293
CHEMBL192894	FC	'='	2.4	fold		transactivation	rosiglitazone	2.9	HEK293
CHEMBL44	FC	'='	2	fold		transactivation	rosiglitazone	2.9	HEK293
CHEMBL434063	FC	'='	2.7	fold		transactivation	rosiglitazone	2.9	HEK293
CHEMBL117	FC	'='	1.3	fold		transactivation	rosiglitazone	2.9	HEK293
CHEMBL121	FC	'='	2.9	fold		transactivation	rosiglitazone	2.9	HEK293
CHEMBL150	FC				Not Active	transactivation	rosiglitazone	2.9	HEK293
CHEMBL502126	FC	'='	2.5	fold		transactivation	troglitazone (deduction)	2.8	HCA-7
CHEMBL456529	FC	'='	2.2	fold		transactivation	troglitazone (deduction)	2.8	HCA-7
CHEMBL456531	FC	'='	3	fold		transactivation	troglitazone (deduction)	2.8	HCA-7
CHEMBL457194	FC	'='	2.2	fold		transactivation	troglitazone (deduction)	2.8	HCA-7
CHEMBL515204	FC	'='	2.8	fold		transactivation	troglitazone (deduction)	2.8	HCA-7
CHEMBL450921	FC	'='	2.3	fold		transactivation	troglitazone (deduction)	2.8	HCA-7
CHEMBL496464	FC	'='	1.9	fold		transactivation	troglitazone (deduction)	2.8	HCA-7
CHEMBL456769	FC	'='	1.1	fold		transactivation	troglitazone (deduction)	2.8	HCA-7
CHEMBL455940	FC	'='	2.3	fold		transactivation	troglitazone (deduction)	2.8	HCA-7
CHEMBL505097	FC	'='	1	fold		transactivation	troglitazone (deduction)	2.8	HCA-7
CHEMBL456768	FC	'='	2.8	fold		transactivation	troglitazone (deduction)	2.8	HCA-7
CHEMBL514405	FC	'='	3.9	fold		transactivation	troglitazone (deduction)	2.8	HCA-7
CHEMBL18797	FC	'='	3.4	fold		transactivation	troglitazone (deduction)	2.8	HCA-7
CHEMBL456987	FC	'='	1.4	fold		transactivation	troglitazone (deduction)	2.8	HCA-7
CHEMBL515831	FC	'='	2	fold		transactivation	troglitazone (deduction)	2.8	HCA-7
CHEMBL456530	FC	'='	2.5	fold		transactivation	troglitazone (deduction)	2.8	HCA-7
CHEMBL457404	FC	'='	2.1	fold		transactivation	troglitazone (deduction)	2.8	HCA-7
CHEMBL496463	FC	'='	1.2	fold		transactivation	troglitazone (deduction)	2.8	HCA-7
CHEMBL457184	FC	'='	2.2	fold		transactivation	troglitazone (deduction)	2.8	HCA-7
CHEMBL515823	FC	'='	3.7	fold		transactivation	troglitazone (deduction)	2.8	HCA-7
CHEMBL517909	FC	'='	3.7	fold		transactivation	troglitazone (deduction)	2.8	HCA-7
CHEMBL457853	FC	'='	2.6	fold		transactivation	troglitazone (deduction)	2.8	HCA-7
CHEMBL505553	FC	'='	0.5	fold		transactivation	troglitazone (deduction)	2.8	HCA-7
CHEMBL514871	EC50	'='	5830	nM		transactivation			CV-1
CHEMBL489769	EC50	'='	18760	nM		transactivation			CV-1
CHEMBL475915	EC50	'='	2060	nM		transactivation			CV-1
CHEMBL489171	EC50	'='	174	nM		transactivation			CV-1
CHEMBL491596	EC50	'='	5290	nM		transactivation			CV-1
CHEMBL489563	EC50	'='	2380	nM		transactivation			CV-1
CHEMBL491623	EC50	'='	2320	nM		transactivation			CV-1
CHEMBL478675	EC50	'='	2150	nM		transactivation			CV-1
CHEMBL490402	EC50	'='	670	nM		transactivation			CV-1
CHEMBL491622	EC50	'='	12600	nM		transactivation			CV-1
CHEMBL523944	EC50	'='	728	nM		transactivation			CV-1
CHEMBL489172	EC50	'='	706	nM		transactivation			CV-1
CHEMBL490401	EC50	'='	1440	nM		transactivation			CV-1
CHEMBL489178	EC50	'='	862	nM		transactivation			CV-1
CHEMBL513886	EC50	'='	639	nM		transactivation			CV-1
CHEMBL489363	EC50	'='	3720	nM		transactivation			CV-1
CHEMBL491597	EC50	'='	4880	nM		transactivation			CV-1
CHEMBL491606	EC50	'='	3930	nM		transactivation			CV-1
CHEMBL522754	EC50	'='	661	nM		transactivation			CV-1
CHEMBL489377	EC50	'='	1420	nM		transactivation			CV-1
CHEMBL186179	EC50	'='	153	nM		transactivation			CV-1
CHEMBL516274	EC50	'='	1890	nM		transactivation			CV-1
CHEMBL514544	EC50	'='	7560	nM		transactivation			CV-1
CHEMBL475916	EC50	'='	1670	nM		transactivation			CV-1
CHEMBL490395	EC50	'='	689	nM		transactivation			CV-1
CHEMBL491423	EC50	'='	3300	nM		transactivation			CV-1
CHEMBL523649	EC50	'='	4600	nM		transactivation			CV-1
CHEMBL489591	EC50	'='	504	nM		transactivation			CV-1
CHEMBL489768	EC50	'='	22830	nM		transactivation			CV-1
CHEMBL492031	EC50	'='	2300	nM		transactivation			CV-1
CHEMBL489364	EC50	'='	396	nM		transactivation			CV-1
CHEMBL477801	EC50	'='	2230	nM		transactivation			CV-1
CHEMBL282686	EC50	'='	704	nM		transactivation			CV-1
CHEMBL121	EC50	'='	33	nM		transactivation			CV-1
CHEMBL550762	Activity				Not Active	transactivation	rosiglitazone		MCF7
CHEMBL549351	Activity				Active	transactivation	rosiglitazone		MCF7
CHEMBL554608	Activity				Active	transactivation	rosiglitazone		MCF7
CHEMBL561371	Activity				Not Active	transactivation	rosiglitazone		MCF7
CHEMBL121	Activity				Active	transactivation	rosiglitazone		MCF7
CHEMBL511100	EC50	'='	1400	nM		transactivation			CV-1
CHEMBL497204	EC50	'='	500	nM		transactivation			CV-1
CHEMBL503072	EC50	'='	610	nM		transactivation			CV-1
CHEMBL506419	EC50	'='	2200	nM		transactivation			CV-1
[truncated: 7,124 more rows]

## Sheet: Table S2
Table S2. Curated environmental health and toxicology (EHT) set
PubChem CID	Preferred Name	Compound Key	Mixture Component	CAS-RN	Activity Class
cid77999	rosiglitazone	Rosi.	Rosi.	cas122320-73-4	Active
cid71316600	2-ethylhexyl-2,3,4,5-tetrabromobenzoate	TBB	TBB	cas183658-27-7	Inactive
cid15709948	2,3,4,5-tetrabromobenzoic acid	TBBA	TBBA	cas27581-13-1	Active
cid117291	bis(2-ethylhexyl)tetrabromo phthalate	TBPH	TBPH	cas26040-51-7	Inactive
cid54403390	tetrabromo-mono(2-ethylhexyl)phthalate	TBMEHP	TBMEHP	cas61776-60-1	Active
cid8343	di-(2-ethylhexyl)phthalate	DEHP	DEHP	cas117-81-7	Inactive
cid20393	2-(2-ethylhexoxycarbonyl)benzoic acid	MEHP	MEHP	cas4376-20-9	Active
cid8289	triphenyl phosphate	TPP	TPP	cas115-86-6	Active
cid13282	diphenyl phosphate	DPP	DPP	cas838-85-7	Inactive
cid12540	triphenyltin chloride	TPT	TPT	cas639-58-7	Active
cid7540	triphenyl phosphite	TPPi	TPPi	cas101-02-0	Inconclusive
cid15096	tributyltin chloride	TBT	TBT	cas1461-22-9	Active
cid31357	tributyl phosphate	TBuP	TBuP	cas126-73-8	Inconclusive
cid6540	tris(2-butoxyethyl) phosphate	TBOEP	TBOEP	cas78-51-3	Inconclusive
cid6623	bisphenol A	BPA	BPA	cas80-05-7|27100-33-0	Inactive
cid6619	tetrachlorobisphenol A	TCBPA	TCBPA	cas79-95-8	Active
cid6618	tetrabromobisphenol A	TBBPA	TBBPA	cas79-94-7	Active
cid519974	2,4,6-trifluorophenol	2,4,6-TFP	2,4,6-TFP	cas2268-17-9	Inactive
cid6914	2,4,6,-trichlorophenol	2,4,6-TCP	2,4,6-TCP	cas88-06-2	Inactive
cid1483	2,4,6-tribromophenol	2,4,6-TBP	2,4,6-TBP	cas118-79-6	Active
cid11862	2,4,6-triiodophenol	2,4,6-TIP	2,4,6-TIP	cas609-23-4	Active
cid95170	2,2',4,4'-tetrabromodiphenyl ether	BDE-47	BDE-47	cas5436-43-1	Active
cid10885611	3-OH-BDE-47	3-OH-BDE-47	3-OH-BDE-47		Active
cid11730812	5-OH-BDE-47	5-OH-BDE-47	5-OH-BDE-47	cas602326-30-7	Inconclusive
cid3086109	6-OH-BDE-47	6-OH-BDE-47	6-OH-BDE-47	cas79755-43-4	Inactive
cid36159	2,2',4,4',5-pentabromodiphenyl ether	BDE-99	BDE-99	cas60348-60-9	Inactive
cid86256374	5'-OH-BDE-99	5'-OH-BDE-99	5'-OH-BDE-99		Inconclusive
cid86256375	6'-OH-BDE-99	6'-OH-BDE-99	6'-OH-BDE-99		Inconclusive
cid5564	triclosan	TCS	TCS	cas3380-34-5	Inactive
cid70425	4-tert-butylphenyl diphenyl phosphate	BPDP	BPDP(p)	cas981-40-8	Active(m)
cid23424303	3-tert-butylphenyl diphenyl phosphate	BPDP	BPDP(m)		Active(m)
cid158333	2-tert-butylphenyl diphenyl phosphate	BPDP	BPDP(o)	cas56803-37-3	Active(m)
cid6530	tris(4-tert-butylphenyl) phosphate	TBPP	TBPP(4)	cas78-33-1	Inconclusive(m)
cid34148	mono-2-isopropylated triaryl phosphates	mono-ITP	mono-ITP(2)	cas28108-99-8|93925-53-2|64532-94-1
cid155311	mono-3-isopropylated triaryl phosphates	mono-ITP	mono-ITP(3)	cas69515-46-4
cid91908	mono-4-isopropylated triaryl phosphates	mono-ITP	mono-ITP(4)	cas55864-04-5
cid34149	di-2-isopropylated triaryl phosphates	Di-ITP	Di-ITP(2)	cas69500-29-4
cid13767289	di-3-isopropylated triaryl phosphates	Di-ITP	Di-ITP(3)	cas69500-30-7
cid13767290	di-4-isopropylated triaryl phosphates	Di-ITP	Di-ITP(4)	cas55864-07-8
cid33661	tri-2-isopropylated triaryl phosphates	Tri-ITP	Tri-ITP(2)	cas64532-95-2
cid93424	tri-3-isopropylated triaryl phosphates	Tri-ITP	Tri-ITP(3)	cas72668-27-0
cid75628	tri-4-isopropylated triaryl phosphates	Tri-ITP	Tri-ITP(4)	cas26967-76-0|2502-15-0|68937-41-7
cid6782	diisobutyl phthalate	DiBP	DiBP	cas84-69-5	Active
cid590836	diisononyl phthalate	DiNP	DiNP	cas28553-12-0|68515-48-0	Inconclusive
cid3026	dibutyl phthalate	DBP	DBP	cas84-74-2|93952-11-5	Inconclusive
cid2347	benzyl butyl phthalate	BzBP	BzBP	cas85-68-7	Active
cid5370325	bis(2-ethylhexyl) fumarate	BEHF	BEHF	cas141-02-6	Inactive
cid5311211	15-Deoxy-D12,14-prostaglandin J2	15d-PJG2	15d-PJG2	cas87893-55-8	Active
cid20161169	monochlorobisphenol A	monoCBPA	monoCBPA		Inactive
cid66238	dichlorobisphenol A	diCBPA	diCBPA	cas79-98-1	Inconclusive
cid20569227	trichlorobisphenol A	triCBPA	triCBPA		Active
cid9554	perfluorooctanoic acid	PFOA	PFOA	cas335-67-1|335-93-3	Inactive
cid74483	perfluorooctane sulfonic acid	PFOS	PFOS	cas1763-23-1	Inconclusive
cid23673837	docusate sodium	DOSS	DOSS	cas577-11-7	Inconclusive
cid656688	monobromobisphenol A	monoBBPA	monoBBPA		Inconclusive
cid656687	dibromobisphenol A	diBBPA	diBBPA		Inconclusive
cid80801	tribromobisphenol A	triBBPA	triBBPA	cas6386-73-8	Active
cid52940048	tetrabromobisphenol A sulfate	TBBPA-sulf	TBBPA-sulf		Active
cid_x1	tetrachlorobisphenol A sulfate	TCBPA-sulf	TCBPA-sulf		Active
cid14716	2-ethylhexyl diphenyl phosphate	EHDPP	EHDPP	cas1241-94-7	Inconclusive
cid8295	tris(2-chloroethyl)phosphate	TCEP	TCEP	cas115-96-8|29716-44-7|68411-66-5	Inactive
cid26176	tris(1-chloropropan-2-yl) phosphate	TCPP	TCPP	cas13674-84-5	Inactive
cid5280450	linoleic acid	LA	LA	cas60-33-3|506-21-8|2197-37-7|80969-37-5|8024-22-4	Inconclusive
cid22568738	6:2 Cl-PFAES	6:2 Cl-PFAES	6:2 Cl-PFAES		Inconclusive
cid15099039	8:2 Cl-PFAES	8:2 Cl-PFAES	8:2 Cl-PFAES		Inconclusive
cid5591	troglitazone	Trog.	Trog.	cas97322-87-7	Active
cid16683296	bis(triphenyltin)oxide	TPTO	TPTO	cas1262-21-1	Inconclusive
cid449171	9-cis-retinoic acid	9-cis RA	9-cis RA	cas5300-03-8	Inactive
cid444795	all-trans-retinoic acid	all-trans RA	all-trans RA	cas302-79-4|97950-17-9|4759-48-2	Inactive
cid14236	monobutyltin trichloride	MBT	MBT	cas1118-46-3	Inactive
cid12688	dibutyltin dichloride	DBT	DBT	cas683-18-1	Inconclusive
cid6421	trichloroacetic acid	TCA	TCA	cas76-03-9|650-51-1	Inactive
cid6597	dichloroacetic acid	DCA	DCA	cas79-43-6	Inactive
cid8697	2-ethylhexanoic acid	EHA	EHA	cas149-57-5|61788-37-2|125804-07-1	Inactive
cid7720	2-ethylhexanol	EOH	EOH	cas104-76-7|91994-92-2	Inactive
cid1486	2,4-dichlorophenoxyacetic acid	2,4-D	2,4-D	cas94-75-7|2702-72-9|5742-17-6	Inactive
cid7204	2-methyl-4-chlorophenoxyacetic acid	MCPA	MCPA	cas94-74-6|3653-48-3	Inactive
Associated Literature
DOI	Journal	Title	Year	Volume	Note
10.1289/ehp.1408522	Environ. Health Perspect.	Characterizing the Peroxisome Proliferator-Activated Receptor (PPARγ) Ligand Binding Potential of Several Major Flame Retardants, Their Metabolites, and Chemical Mixtures in House Dust	2015	123
10.1021/acs.est.5b01523	Environ. Sci. Technol.	Activation of Human Peroxisome Proliferator-Activated Nuclear Receptors (PPARg1) by Semi-Volatile Compounds (SVOCs) and Chemical Mixtures in Indoor Dust	2015	49
10.1289/ehp.1003328	Environ. Health Perspect.	Peroxisome Proliferator-Activated Receptor C Is a Target for Halogenated Analogs of Bisphenol A	2011	119
10.1289/ehp.1205063	Environ. Health Perspect.	Bisphenol A Diglycidyl Ether Induces Adipogenic Differentiation of Multipotent Stromal Stem Cells through a Peroxisome Proliferator–Activated Receptor Gamma-Independent Mechanism	2012	120
10.1289/ehp.1408111	Environ. Health Perspect.	Ligand Binding and Activation of PPARg by Firemaster 550: Effects on Adipogenesis and Osteogenesis in Vitro	2014	122
10.1289/ehp.1409672	Environ. Health Perspect.	Effects of Crude Oil/Dispersant Mixture and Dispersant Components on PPARγ Activity in Vitro and in Vivo: Identification of Dioctyl Sodium Sulfosuccinate (DOSS; CAS #577-11-7) as a Probable Obesogen	2016	124
10.1021/acs.est.6b01890	Environ. Sci. Technol.	Peroxisome Proliferator-Activated Receptor C is a Sensitive Target for Oil Sands Process-Affected Water: Effects on Adipogenesis and Identification of Ligands	2016	50	Mixture and qualitative
10.1093/toxsci/kfl135	Toxicol. Sci.	Activation of Mouse and Human Peroxisome Proliferator–Activated Receptors (a, b/d, c) by Perfluorooctanoic Acid and Perfluorooctane Sulfonate	2007	95	Nether PFOS or PFOA activate hPPARg
10.1074/jbc.M702724200	J. Biol. Chem.	The Endocrine Disruptor Monoethyl-hexyl-phthalate Is a Selective Peroxisome Proliferator-activated Receptor C Modulator That Promotes Adipogenesis	2007	282
10.1093/toxsci/kfr132	Toxicol. Sci.	Characterization of Novel Ligands of ERa, Erb, and PPARc: The Case of Halogenated Bisphenol A and Their Conjugated Metabolites	2011	122
10.1021/acs.est.7b00872	Environ. Sci. Technol.	Activation of Peroxisome Proliferator-Activated Receptor Gamma and Disruption of Progesterone Synthesis of 2?Ethylhexyl Diphenyl Phosphate in Human Placental Choriocarcinoma Cells: Comparison with Triphenyl Phosphate	2017	51
10.1021/acs.est.7b06327	Environ. Sci. Technol.	Chlorinated Polyfluorinated Ether Sulfonates Exhibit Higher Activity toward Peroxisome Proliferator-Activated Receptors Signaling Pathways than Perfluorooctanesulfonate	2018	52
10.1093/toxsci/kfw186	Toxicol. Sci.	Screening ToxCast Prioritized Chemicals for PPARG Function in a Human Adipose-Derived Stem Cell Model of Adipogenesis	2017	155
10.1210/me.2005-0367	Mol. Endocrinol.	Endocrine-Disrupting Organotin Compounds Are Potent Inducers of Adipogenesis in Vertebrates	2006	20
10.1006/taap.1999.8809	Toxicol. Appl. Pharmacol.	trans-activation of PPAR alpha and PPAR gamma by structurally diverse environmental chemicals	1999	161
10.1289/EHP3030	Environ. Health Perspect.	Effects of Perinatal Exposure to Dibutyltin Chloride on Fat and Glucose Metabolism in Mice, and Molecular Mechanisms, in Vitro	2018	126	DBT is very weak agonist for hPPARg

## Sheet: Table S3
Table S3. Simple inorganic and organic components/salts
Type	Name	SMILESa
Inorganic	Lithium	[Li+]
	Sodium	[Na+]
	Potassium	[K+]
	Hydrochloride	Cl
	Hydrobromide	Br
	Hydroiodide	I
	Ammonia	N
	Hydrate (water)	O
	Sulfuric acid	O=S(=O)(O)O
	Phosphoric acid	O=P(O)(O)O
	Nitric acid	O=[N+]([O-])O
Organicb	Tert-butylamine	CC(C)(C)N
	Citric acid	O=C(O)CC(O)(CC(=O)O)C(=O)O
	Methanesulfonic acid	CS(=O)(=O)O
	Cyclohexylamine	NC1CCCCC1
	Benzoic acid	O=C(O)c1ccccc1
	Acetic acid	CC(=O)O
	Tartaric acid	O=C(O)C(O)C(O)C(=O)O
	Oxalic acid	O=C(O)C(=O)O
	Isethionic acid	O=S(=O)(O)CCO
	Maleic acid	O=C(O)/C=C\C(=O)O
	Fumaric acid	O=C(O)/C=C/C(=O)O
a. Both neutral and ionized forms will be stripped off.
b. Used for Tox21 library only.

## Sheet: Table S4
Table S4. Categorized data set obtained with the discretizing scheme
CmpdID	EffClass_Active_count	EffClass_Inactive_count	EffClass_Inconclusive_count	EffClass_consistency	pEC50Class_Active_count	pEC50Class_Inactive_count	pEC50Class_Inconclusive_count	pEC50Class_consistency	TA_Comment_Active_count	TA_Comment_Inactive_count	TA_Comment_Inconclusive_count	TA_Comment_consistency	pAffiClass_Active_count	pAffiClass_Inactive_count	pAffiClass_Inconclusive_count	pAffiClass_consistency	binding_Comment_Active_count	binding_Comment_Inactive_count	binding_Comment_Inconclusive_count	binding_Comment_consistency	Activity Class
CHEMBL101123	0	0	0		1	0	0	TRUE	0	0	0		0	0	0		0	0	0		Inconclusive
CHEMBL1017	12	0	0	TRUE	9	0	0	TRUE	0	0	0		1	0	1	FALSE	0	0	0		Active
CHEMBL102004	0	0	0		1	0	0	TRUE	0	0	0		0	0	0		0	0	0		Inconclusive
CHEMBL1023	0	0	0		0	0	0		0	1	0	TRUE	0	0	0		0	0	0		Inactive
CHEMBL104246	0	0	0		1	0	0	TRUE	0	0	0		1	0	0	TRUE	0	0	0		Inconclusive
CHEMBL104458	0	0	0		1	0	0	TRUE	0	0	0		1	0	0	TRUE	0	0	0		Inconclusive
CHEMBL104494	0	0	0		1	0	0	TRUE	0	0	0		1	0	0	TRUE	0	0	0		Inconclusive
CHEMBL104850	1	0	0	TRUE	4	0	0	TRUE	0	0	0		4	0	0	TRUE	0	0	0		Active
CHEMBL105088	0	0	0		1	0	0	TRUE	0	0	0		1	0	0	TRUE	0	0	0		Inconclusive
CHEMBL106666	1	0	0	TRUE	4	0	0	TRUE	0	0	0		2	0	0	TRUE	0	0	0		Active
CHEMBL107367	2	0	0	TRUE	7	0	0	TRUE	0	0	0		7	0	0	TRUE	0	0	0		Active
CHEMBL107498	1	0	0	TRUE	0	0	0		0	0	0		0	0	1	TRUE	0	0	0		Inconclusive
CHEMBL1075665	0	0	0		1	0	0	TRUE	0	0	0		0	0	0		0	0	0		Inconclusive
CHEMBL1075682	0	0	0		1	0	0	TRUE	0	0	0		0	0	0		0	0	0		Inconclusive
CHEMBL1075683	0	0	0		1	0	0	TRUE	0	0	0		0	0	0		0	0	0		Inconclusive
CHEMBL1075703	0	0	0		1	0	0	TRUE	0	0	0		0	0	0		0	0	0		Inconclusive
CHEMBL1075704	0	0	0		1	0	0	TRUE	0	0	0		0	0	0		0	0	0		Inconclusive
CHEMBL1075705	0	0	0		1	0	0	TRUE	0	0	0		0	0	0		0	0	0		Inconclusive
CHEMBL1075706	0	0	0		1	0	0	TRUE	0	0	0		0	0	0		0	0	0		Inconclusive
CHEMBL1075723	1	0	0	TRUE	1	0	0	TRUE	0	0	0		0	0	0		0	0	0		Active
CHEMBL1075724	1	0	0	TRUE	1	0	0	TRUE	0	0	0		0	0	0		0	0	0		Active
CHEMBL1075725	0	0	0		1	0	0	TRUE	0	0	0		0	0	0		0	0	0		Inconclusive
CHEMBL1075732	1	0	0	TRUE	1	0	0	TRUE	0	0	0		0	0	0		0	0	0		Active
CHEMBL1075772	0	0	0		1	0	0	TRUE	0	0	0		0	0	0		0	0	0		Inconclusive
CHEMBL1075835	0	0	0		1	0	0	TRUE	0	0	0		0	0	0		0	0	0		Inconclusive
CHEMBL1075836	0	0	0		1	0	0	TRUE	0	0	0		0	0	0		0	0	0		Inconclusive
CHEMBL1075856	0	0	0		1	0	0	TRUE	0	0	0		0	0	0		0	0	0		Inconclusive
CHEMBL1075893	0	0	0		1	0	0	TRUE	0	0	0		0	0	0		0	0	0		Inconclusive
CHEMBL1075894	1	0	0	TRUE	1	0	0	TRUE	0	0	0		0	0	0		0	0	0		Active
CHEMBL1075895	1	0	0	TRUE	1	0	0	TRUE	0	0	0		0	0	0		0	0	0		Active
CHEMBL1076151	0	0	0		1	0	0	TRUE	0	0	0		0	0	0		0	0	0		Inconclusive
CHEMBL1076175	0	0	0		1	0	0	TRUE	0	0	0		0	0	0		0	0	0		Inconclusive
CHEMBL107741	0	0	0		1	0	0	TRUE	0	0	0		1	0	0	TRUE	0	0	0		Inconclusive
CHEMBL107789	0	0	0		0	0	1	TRUE	0	0	0		0	0	1	TRUE	0	0	0		Inconclusive
CHEMBL107794	0	0	0		1	0	0	TRUE	0	0	0		1	0	0	TRUE	0	0	0		Inconclusive
CHEMBL1077990	0	0	0		0	0	0		1	1	0	FALSE	0	0	0		0	0	0		Inconclusive
CHEMBL1079382	0	0	0		1	0	0	TRUE	0	0	0		0	0	0		0	0	0		Inconclusive
CHEMBL1079402	0	0	0		0	0	0		0	2	0	TRUE	0	0	0		0	0	0		Inactive
CHEMBL1079449	0	0	0		1	0	0	TRUE	0	0	0		0	0	0		0	0	0		Inconclusive
CHEMBL1079488	0	0	0		1	0	0	TRUE	0	0	0		0	0	0		0	0	0		Inconclusive
CHEMBL1079489	0	0	0		1	0	0	TRUE	0	0	0		0	0	0		0	0	0		Inconclusive
CHEMBL1079503	0	0	0		1	0	0	TRUE	0	0	0		0	0	0		0	0	0		Inconclusive
CHEMBL1079504	0	0	0		1	0	0	TRUE	0	0	0		0	0	0		0	0	0		Inconclusive
CHEMBL1079505	0	0	0		1	0	0	TRUE	0	0	0		0	0	0		0	0	0		Inconclusive
CHEMBL1079591	0	0	0		0	0	0		0	3	0	TRUE	0	0	0		0	0	0		Inactive
CHEMBL1079617	0	0	0		1	0	0	TRUE	0	0	0		0	0	0		0	0	0		Inconclusive
CHEMBL1079618	0	0	0		1	0	0	TRUE	0	0	0		0	0	0		0	0	0		Inconclusive
CHEMBL1079646	0	0	0		1	0	0	TRUE	0	0	0		0	0	0		0	0	0		Inconclusive
CHEMBL1079668	0	0	0		1	0	0	TRUE	0	0	0		0	0	0		0	0	0		Inconclusive
CHEMBL1079669	1	0	0	TRUE	1	0	0	TRUE	0	0	0		0	0	0		0	0	0		Active
CHEMBL1079677	0	0	0		1	0	0	TRUE	0	0	0		0	0	0		0	0	0		Inconclusive
CHEMBL1079739	0	0	0		1	0	0	TRUE	0	0	0		0	0	0		0	0	0		Inconclusive
CHEMBL1079765	0	0	0		0	0	0		0	3	0	TRUE	0	0	0		0	0	0		Inactive
CHEMBL1079766	0	0	0		0	0	0		0	2	0	TRUE	0	0	0		0	0	0		Inactive
CHEMBL1079821	0	0	0		1	0	0	TRUE	0	0	0		0	0	0		0	0	0		Inconclusive
CHEMBL1079826	0	0	0		1	0	0	TRUE	0	0	0		0	0	0		0	0	0		Inconclusive
CHEMBL107991	0	0	0		1	0	0	TRUE	0	0	0		1	0	0	TRUE	0	0	0		Inconclusive
CHEMBL1079910	0	0	0		1	0	0	TRUE	0	0	0		0	0	0		0	0	0		Inconclusive
CHEMBL1079911	0	0	0		1	0	0	TRUE	0	0	0		0	0	0		0	0	0		Inconclusive
CHEMBL1079925	0	0	0		1	0	0	TRUE	0	0	0		0	0	0		0	0	0		Inconclusive
CHEMBL1079944	0	0	0		0	0	0		0	3	0	TRUE	0	0	0		0	0	0		Inactive
CHEMBL1079961	1	0	0	TRUE	1	0	0	TRUE	0	0	0		0	0	0		0	0	0		Active
CHEMBL1079962	1	0	0	TRUE	1	0	0	TRUE	0	0	0		0	0	0		0	0	0		Active
CHEMBL1079965	0	0	0		1	0	0	TRUE	0	0	0		0	0	0		0	0	0		Inconclusive
CHEMBL1079981	0	0	0		1	0	0	TRUE	0	0	0		0	0	0		0	0	0		Inconclusive
CHEMBL1079982	0	0	0		1	0	0	TRUE	0	0	0		0	0	0		0	0	0		Inconclusive
CHEMBL1079983	0	0	0		1	0	0	TRUE	0	0	0		0	0	0		0	0	0		Inconclusive
CHEMBL1079984	0	0	0		1	0	0	TRUE	0	0	0		0	0	0		0	0	0		Inconclusive
CHEMBL1080013	0	0	0		1	0	0	TRUE	0	0	0		0	0	0		0	0	0		Inconclusive
CHEMBL1080025	0	0	0		1	0	0	TRUE	0	0	0		0	0	0		0	0	0		Inconclusive
CHEMBL1080026	0	0	0		1	0	0	TRUE	0	0	0		0	0	0		0	0	0		Inconclusive
CHEMBL1080032	0	0	0		1	0	0	TRUE	0	0	0		0	0	0		0	0	0		Inconclusive
CHEMBL1080033	0	0	0		1	0	0	TRUE	0	0	0		0	0	0		0	0	0		Inconclusive
CHEMBL1080108	0	0	0		1	0	0	TRUE	0	0	0		0	0	0		0	0	0		Inconclusive
CHEMBL1080140	1	0	0	TRUE	1	0	0	TRUE	0	0	0		0	0	0		0	0	0		Active
CHEMBL1080143	0	0	0		1	0	0	TRUE	0	0	0		0	0	0		0	0	0		Inconclusive
CHEMBL1080168	0	0	0		1	0	0	TRUE	0	0	0		0	0	0		0	0	0		Inconclusive
CHEMBL1080172	0	0	0		1	0	0	TRUE	0	0	0		0	0	0		0	0	0		Inconclusive
CHEMBL1080173	0	0	0		1	0	0	TRUE	0	0	0		0	0	0		0	0	0		Inconclusive
CHEMBL1080184	0	0	0		1	0	0	TRUE	0	0	0		0	0	0		0	0	0		Inconclusive
CHEMBL1080187	0	0	0		1	0	0	TRUE	0	0	0		0	0	0		0	0	0		Inconclusive
CHEMBL1080188	0	0	0		1	0	0	TRUE	0	0	0		0	0	0		0	0	0		Inconclusive
CHEMBL1080312	0	0	0		1	0	0	TRUE	0	0	0		0	0	0		0	0	0		Inconclusive
CHEMBL1080349	0	0	0		1	0	0	TRUE	0	0	0		0	0	0		0	0	0		Inconclusive
CHEMBL1080355	0	0	0		1	0	0	TRUE	0	0	0		0	0	0		0	0	0		Inconclusive
CHEMBL1080356	0	0	0		1	0	0	TRUE	0	0	0		0	0	0		0	0	0		Inconclusive
CHEMBL1080361	0	0	0		1	0	0	TRUE	0	0	0		0	0	0		0	0	0		Inconclusive
CHEMBL1080363	0	0	0		1	0	0	TRUE	0	0	0		0	0	0		0	0	0		Inconclusive
CHEMBL1080365	1	0	0	TRUE	1	0	0	TRUE	0	0	0		0	0	0		0	0	0		Active
CHEMBL1080366	0	0	0		1	0	0	TRUE	0	0	0		0	0	0		0	0	0		Inconclusive
CHEMBL1080368	0	0	0		1	0	0	TRUE	0	0	0		0	0	0		0	0	0		Inconclusive
CHEMBL1080369	0	0	0		1	0	0	TRUE	0	0	0		0	0	0		0	0	0		Inconclusive
CHEMBL1080469	0	0	0		0	0	0		0	4	0	TRUE	0	0	0		0	0	0		Inactive
CHEMBL1080470	0	0	0		0	0	0		0	3	0	TRUE	0	0	0		0	0	0		Inactive
CHEMBL1080532	0	0	0		1	0	0	TRUE	0	0	0		0	0	0		0	0	0		Inconclusive
CHEMBL1080533	0	0	0		1	0	0	TRUE	0	0	0		0	0	0		0	0	0		Inconclusive
CHEMBL1080534	0	0	0		1	0	0	TRUE	0	0	0		0	0	0		0	0	0		Inconclusive
CHEMBL1080535	0	0	0		1	0	0	TRUE	0	0	0		0	0	0		0	0	0		Inconclusive
CHEMBL1080540	0	0	0		1	0	0	TRUE	0	0	0		0	0	0		0	0	0		Inconclusive
CHEMBL1080699	0	1	0	TRUE	0	0	1	TRUE	0	0	0		0	0	0		0	0	0		Inconclusive
CHEMBL1080708	0	0	0		1	0	0	TRUE	0	0	0		0	0	0		0	0	0		Inconclusive
CHEMBL1080821	0	0	0		1	0	0	TRUE	0	0	0		0	0	0		0	0	0		Inconclusive
CHEMBL1080873	0	0	0		1	0	0	TRUE	0	0	0		0	0	0		0	0	0		Inconclusive
CHEMBL1081003	1	0	0	TRUE	1	0	0	TRUE	0	0	0		0	0	0		0	0	0		Active
CHEMBL1081004	0	0	0		1	0	0	TRUE	0	0	0		0	0	0		0	0	0		Inconclusive
CHEMBL1081044	0	0	0		1	0	0	TRUE	0	0	0		0	0	0		0	0	0		Inconclusive
CHEMBL1081045	0	0	0		1	0	0	TRUE	0	0	0		0	0	0		0	0	0		Inconclusive
CHEMBL1081046	0	0	0		1	0	0	TRUE	0	0	0		0	0	0		0	0	0		Inconclusive
CHEMBL1081073	0	0	0		0	0	1	TRUE	0	0	0		0	0	0		0	0	0		Inconclusive
CHEMBL1081206	0	0	0		1	0	0	TRUE	0	0	0		0	0	0		0	0	0		Inconclusive
CHEMBL1081207	0	0	0		1	0	0	TRUE	0	0	0		0	0	0		0	0	0		Inconclusive
CHEMBL1081223	0	0	0		1	0	0	TRUE	0	0	0		0	0	0		0	0	0		Inconclusive
CHEMBL1081224	0	0	0		1	0	0	TRUE	0	0	0		0	0	0		0	0	0		Inconclusive
CHEMBL1081241	0	0	0		1	0	0	TRUE	0	0	0		0	0	0		0	0	0		Inconclusive
CHEMBL1081353	0	0	0		0	0	0		0	1	0	TRUE	0	0	0		0	0	0		Inactive
CHEMBL1081354	0	0	0		0	0	0		0	3	0	TRUE	0	0	0		0	0	0		Inactive
CHEMBL1081355	0	0	0		0	0	0		0	1	0	TRUE	0	0	0		0	0	0		Inactive
CHEMBL1081380	0	0	0		1	0	0	TRUE	0	0	0		0	0	0		0	0	0		Inconclusive
CHEMBL1081387	0	0	0		1	0	0	TRUE	0	0	0		0	0	0		0	0	0		Inconclusive
CHEMBL1081391	0	0	0		1	0	0	TRUE	0	0	0		0	0	0		0	0	0		Inconclusive
CHEMBL1081410	0	0	0		1	0	0	TRUE	0	0	0		0	0	0		0	0	0		Inconclusive
CHEMBL1081424	0	0	0		1	0	0	TRUE	0	0	0		0	0	0		0	0	0		Inconclusive
CHEMBL1081591	0	0	0		1	0	0	TRUE	0	0	0		0	0	0		0	0	0		Inconclusive
CHEMBL1081600	0	0	0		1	0	0	TRUE	0	0	0		0	0	0		0	0	0		Inconclusive
CHEMBL1081601	0	0	0		1	0	0	TRUE	0	0	0		0	0	0		0	0	0		Inconclusive
CHEMBL1081602	0	0	0		1	0	0	TRUE	0	0	0		0	0	0		0	0	0		Inconclusive
CHEMBL1081603	0	0	0		1	0	0	TRUE	0	0	0		0	0	0		0	0	0		Inconclusive
CHEMBL1081729	0	0	0		1	0	0	TRUE	0	0	0		0	0	0		0	0	0		Inconclusive
CHEMBL1081730	0	0	0		1	0	0	TRUE	0	0	0		0	0	0		0	0	0		Inconclusive
CHEMBL1081749	0	0	0		1	0	0	TRUE	0	0	0		0	0	0		0	0	0		Inconclusive
CHEMBL1081750	0	0	0		1	0	0	TRUE	0	0	0		0	0	0		0	0	0		Inconclusive
CHEMBL1081751	0	0	0		1	0	0	TRUE	0	0	0		0	0	0		0	0	0		Inconclusive
CHEMBL1081756	0	0	0		1	0	0	TRUE	0	0	0		0	0	0		0	0	0		Inconclusive
CHEMBL1081763	0	0	0		1	0	0	TRUE	0	0	0		0	0	0		0	0	0		Inconclusive
CHEMBL1081764	0	0	0		1	0	0	TRUE	0	0	0		0	0	0		0	0	0		Inconclusive
CHEMBL1081771	0	0	0		1	0	0	TRUE	0	0	0		0	0	0		0	0	0		Inconclusive
CHEMBL1081786	1	0	0	TRUE	1	0	0	TRUE	0	0	0		0	0	0		0	0	0		Active
CHEMBL1081917	0	0	0		0	0	0		0	1	0	TRUE	0	0	0		0	0	0		Inactive
CHEMBL1081926	0	0	0		1	0	0	TRUE	0	0	0		0	0	0		0	0	0		Inconclusive
CHEMBL1081949	0	0	0		1	0	0	TRUE	0	0	0		0	0	0		0	0	0		Inconclusive
CHEMBL1081950	1	0	0	TRUE	1	0	0	TRUE	0	0	0		0	0	0		0	0	0		Active
CHEMBL1081951	0	0	0		1	0	0	TRUE	0	0	0		0	0	0		0	0	0		Inconclusive
CHEMBL1081962	0	0	0		1	0	0	TRUE	0	0	0		0	0	0		0	0	0		Inconclusive
CHEMBL1081963	0	0	0		1	0	0	TRUE	0	0	0		0	0	0		0	0	0		Inconclusive
CHEMBL1081964	0	0	0		1	0	0	TRUE	0	0	0		0	0	0		0	0	0		Inconclusive
CHEMBL1082079	0	0	0		0	0	0		0	3	0	TRUE	0	0	0		0	0	0		Inactive
CHEMBL1082089	0	0	0		1	0	0	TRUE	0	0	0		0	0	0		0	0	0		Inconclusive
CHEMBL1082090	0	0	0		1	0	0	TRUE	0	0	0		0	0	0		0	0	0		Inconclusive
CHEMBL1082114	0	0	0		1	0	0	TRUE	0	0	0		0	0	0		0	0	0		Inconclusive
CHEMBL1082115	0	0	0		1	0	0	TRUE	0	0	0		0	0	0		0	0	0		Inconclusive
CHEMBL1082116	0	0	0		1	0	0	TRUE	0	0	0		0	0	0		0	0	0		Inconclusive
CHEMBL1082117	0	0	0		1	0	0	TRUE	0	0	0		0	0	0		0	0	0		Inconclusive
CHEMBL1082118	0	0	0		1	0	0	TRUE	0	0	0		0	0	0		0	0	0		Inconclusive
CHEMBL1082131	0	0	0		1	0	0	TRUE	0	0	0		0	0	0		0	0	0		Inconclusive
CHEMBL1082137	0	0	0		1	0	0	TRUE	0	0	0		0	0	0		0	0	0		Inconclusive
CHEMBL1085795	0	0	0		1	0	0	TRUE	0	0	0		0	0	0		0	0	0		Inconclusive
CHEMBL1086620	0	0	0		0	0	0		0	1	0	TRUE	0	0	0		0	0	0		Inactive
CHEMBL1086861	0	0	0		0	0	0		0	1	0	TRUE	0	0	0		0	0	0		Inactive
CHEMBL1087336	0	0	0		0	0	1	TRUE	0	0	0		0	0	0		0	0	0		Inconclusive
CHEMBL1087339	1	0	0	TRUE	1	0	0	TRUE	0	0	0		0	0	0		0	0	0		Active
CHEMBL1087460	1	0	0	TRUE	1	0	0	TRUE	0	0	0		0	0	0		0	0	0		Active
CHEMBL1087461	0	0	0		0	0	0		0	1	0	TRUE	0	0	0		0	0	0		Inactive
CHEMBL1087465	0	0	0		0	0	0		0	1	0	TRUE	0	0	0		0	0	0		Inactive
CHEMBL1087466	1	0	0	TRUE	1	0	0	TRUE	0	0	0		0	0	0		0	0	0		Active
CHEMBL1087467	1	0	0	TRUE	1	0	0	TRUE	0	0	0		0	0	0		0	0	0		Active
CHEMBL1087471	1	0	0	TRUE	1	0	0	TRUE	0	0	0		0	0	0		0	0	0		Active
CHEMBL1087580	0	0	0		0	0	1	TRUE	0	0	0		0	0	0		0	0	0		Inconclusive
CHEMBL1087581	0	0	0		0	0	1	TRUE	0	0	0		0	0	0		0	0	0		Inconclusive
CHEMBL1087582	0	0	0		0	0	1	TRUE	0	0	0		0	0	0		0	0	0		Inconclusive
CHEMBL1087583	0	0	0		0	0	0		0	1	0	TRUE	0	0	0		0	0	0		Inactive
CHEMBL1087584	1	0	0	TRUE	1	0	0	TRUE	0	0	0		0	0	0		0	0	0		Active
CHEMBL1087587	1	0	0	TRUE	0	0	1	TRUE	0	0	0		0	0	0		0	0	0		Inconclusive
CHEMBL1087588	1	0	0	TRUE	1	0	0	TRUE	0	0	0		0	0	0		0	0	0		Active
CHEMBL1087589	1	0	0	TRUE	1	0	0	TRUE	0	0	0		0	0	0		0	0	0		Active
CHEMBL1087590	1	0	0	TRUE	1	0	0	TRUE	0	0	0		0	0	0		0	0	0		Active
CHEMBL1087593	1	0	0	TRUE	1	0	0	TRUE	0	0	0		0	0	0		0	0	0		Active
CHEMBL1087594	0	0	0		0	0	1	TRUE	0	0	0		0	0	0		0	0	0		Inconclusive
CHEMBL1087712	1	0	0	TRUE	1	0	0	TRUE	0	0	0		0	0	0		0	0	0		Active
CHEMBL1087715	1	0	0	TRUE	1	0	0	TRUE	0	0	0		0	0	0		0	0	0		Active
CHEMBL1087830	0	0	0		0	0	0		0	1	0	TRUE	0	0	0		0	0	0		Inactive
CHEMBL1087831	0	0	0		0	0	0		0	1	0	TRUE	0	0	0		0	0	0		Inactive
CHEMBL1088096	0	0	0		0	0	0		0	1	0	TRUE	0	0	0		0	0	0		Inactive
CHEMBL1088097	1	0	0	TRUE	1	0	0	TRUE	0	0	0		0	0	0		0	0	0		Active
CHEMBL1088098	1	0	0	TRUE	1	0	0	TRUE	0	0	0		0	0	0		0	0	0		Active
CHEMBL1088099	1	0	0	TRUE	1	0	0	TRUE	0	0	0		0	0	0		0	0	0		Active
CHEMBL1088114	1	0	0	TRUE	1	0	0	TRUE	0	0	0		0	0	0		0	0	0		Active
CHEMBL1088246	1	0	0	TRUE	1	0	0	TRUE	0	0	0		0	0	0		0	0	0		Active
CHEMBL1088257	1	0	0	TRUE	1	0	0	TRUE	0	0	0		0	0	0		0	0	0		Active
CHEMBL1088515	1	0	0	TRUE	1	0	0	TRUE	0	0	0		0	0	0		0	0	0		Active
CHEMBL108861	0	0	0		0	0	1	TRUE	0	0	0		0	0	0		0	0	0		Inconclusive
CHEMBL1088666	0	0	0		0	0	0		0	1	0	TRUE	0	0	0		0	0	0		Inactive
CHEMBL1088754	0	0	1	TRUE	0	0	0		0	0	0		0	0	0		0	0	0		Inconclusive
CHEMBL1088910	0	0	0		1	0	0	TRUE	0	0	0		1	0	0	TRUE	0	0	0		Inconclusive
CHEMBL1088911	0	0	0		1	0	0	TRUE	0	0	0		1	0	0	TRUE	0	0	0		Inconclusive
CHEMBL1089110	1	0	0	TRUE	1	0	0	TRUE	0	0	0		0	0	0		0	0	0		Active
CHEMBL1089120	1	0	0	TRUE	1	0	0	TRUE	0	0	0		0	0	0		0	0	0		Active
CHEMBL1089121	1	0	0	TRUE	1	0	0	TRUE	0	0	0		0	0	0		0	0	0		Active
CHEMBL1089158	1	0	0	TRUE	1	0	0	TRUE	0	0	0		0	0	0		0	0	0		Active
CHEMBL1089164	0	0	0		1	0	0	TRUE	0	0	0		1	0	0	TRUE	0	0	0		Inconclusive
CHEMBL1089176	0	0	0		1	0	0	TRUE	0	0	0		1	0	0	TRUE	0	0	0		Inconclusive
CHEMBL1089177	0	0	0		1	0	0	TRUE	0	0	0		0	0	0		0	0	0		Inconclusive
CHEMBL1089210	0	0	0		1	0	0	TRUE	0	0	0		1	0	0	TRUE	0	0	0		Inconclusive
CHEMBL1089317	1	0	0	TRUE	1	0	0	TRUE	0	0	0		0	0	0		0	0	0		Active
CHEMBL1089467	1	0	0	TRUE	1	0	0	TRUE	0	0	0		0	0	0		0	0	0		Active
CHEMBL1089500	0	0	0		1	0	0	TRUE	0	0	0		0	0	1	TRUE	0	0	0		Inconclusive
CHEMBL1089501	1	0	0	TRUE	3	0	0	TRUE	0	0	0		0	0	1	TRUE	0	0	0		Active
CHEMBL1089632	0	0	0		1	0	0	TRUE	0	0	0		0	0	0		0	0	0		Inconclusive
CHEMBL1089633	0	0	0		1	0	0	TRUE	0	0	0		0	0	0		0	0	0		Inconclusive
CHEMBL1089634	0	0	0		1	0	0	TRUE	0	0	0		0	0	0		0	0	0		Inconclusive
CHEMBL1089756	1	0	0	TRUE	0	0	0		0	0	0		0	0	0		0	0	0		Inconclusive
CHEMBL1089761	0	0	1	TRUE	0	0	0		0	0	0		0	0	0		0	0	0		Inconclusive
CHEMBL1089762	1	0	0	TRUE	0	0	0		0	0	0		0	0	0		0	0	0		Inconclusive
CHEMBL1089825	1	0	0	TRUE	0	0	1	TRUE	0	0	0		0	0	0		0	0	0		Inconclusive
CHEMBL1089826	1	0	0	TRUE	1	0	0	TRUE	0	0	0		0	0	0		0	0	0		Active
CHEMBL1089827	1	0	0	TRUE	1	0	0	TRUE	0	0	0		0	0	0		0	0	0		Active
CHEMBL1089859	1	0	0	TRUE	1	0	0	TRUE	0	0	0		0	0	0		0	0	0		Active
CHEMBL1089969	0	0	0		1	0	0	TRUE	0	0	0		1	0	0	TRUE	0	0	0		Inconclusive
CHEMBL1089970	0	0	0		1	0	0	TRUE	0	0	0		1	0	0	TRUE	0	0	0		Inconclusive
CHEMBL1090085	1	0	0	TRUE	0	0	0		0	0	0		0	0	0		0	0	0		Inconclusive
CHEMBL1090086	1	0	0	TRUE	0	0	0		0	0	0		0	0	0		0	0	0		Inconclusive
CHEMBL1090091	1	0	0	TRUE	0	0	0		0	0	0		0	0	0		0	0	0		Inconclusive
CHEMBL1090187	0	0	0		1	0	0	TRUE	0	0	0		1	0	0	TRUE	0	0	0		Inconclusive
CHEMBL1090188	0	0	0		1	0	0	TRUE	0	0	0		1	0	0	TRUE	0	0	0		Inconclusive
CHEMBL1090189	0	0	0		1	0	0	TRUE	0	0	0		1	0	0	TRUE	0	0	0		Inconclusive
CHEMBL1090211	0	0	0		1	0	0	TRUE	0	0	0		1	0	0	TRUE	0	0	0		Inconclusive
CHEMBL1090212	0	0	0		1	0	0	TRUE	0	0	0		1	0	0	TRUE	0	0	0		Inconclusive
CHEMBL1090443	1	0	0	TRUE	0	0	0		0	0	0		1	0	0	TRUE	0	0	0		Active
CHEMBL1090493	1	0	0	TRUE	1	0	0	TRUE	0	0	0		0	0	0		0	0	0		Active
CHEMBL1090521	1	0	0	TRUE	1	0	0	TRUE	0	0	0		0	0	0		0	0	0		Active
CHEMBL1090549	1	0	0	TRUE	1	0	0	TRUE	0	0	0		0	0	0		0	0	0		Active
CHEMBL1090550	1	0	0	TRUE	1	0	0	TRUE	0	0	0		0	0	0		0	0	0		Active
CHEMBL1090557	0	0	0		0	0	1	TRUE	0	0	0		0	0	0		0	0	0		Inconclusive
CHEMBL1090762	0	1	0	TRUE	0	0	0		0	0	0		0	0	0		0	0	0		Inactive
CHEMBL1090763	1	0	0	TRUE	0	0	0		0	0	0		0	0	0		0	0	0		Inconclusive
CHEMBL1090766	1	0	0	TRUE	0	0	0		0	0	0		0	0	0		0	0	0		Inconclusive
CHEMBL1090814	1	0	0	TRUE	0	0	1	TRUE	0	0	0		0	0	0		0	0	0		Inconclusive
CHEMBL1090815	0	0	0		0	0	0		0	3	0	TRUE	0	0	0		0	0	0		Inactive
CHEMBL1090859	0	0	0		0	0	1	TRUE	0	0	0		0	0	0		0	0	0		Inconclusive
CHEMBL1090860	0	0	0		0	0	1	TRUE	0	0	0		0	0	0		0	0	0		Inconclusive
CHEMBL1090861	0	0	0		0	0	1	TRUE	0	0	0		0	0	0		0	0	0		Inconclusive
CHEMBL1090870	1	0	0	TRUE	1	0	0	TRUE	0	0	0		0	0	0		0	0	0		Active
CHEMBL1090877	0	0	0		1	0	0	TRUE	0	0	0		1	0	0	TRUE	0	0	0		Inconclusive
CHEMBL1090878	0	0	0		1	0	0	TRUE	0	0	0		1	0	0	TRUE	0	0	0		Inconclusive
CHEMBL1091113	1	0	0	TRUE	0	0	0		0	0	0		0	0	0		0	0	0		Inconclusive
CHEMBL1091114	0	1	0	TRUE	0	0	0		0	0	0		0	0	0		0	0	0		Inactive
CHEMBL1091125	0	0	1	TRUE	0	0	0		0	0	0		0	0	0		0	0	0		Inconclusive
CHEMBL1091196	0	0	0		1	0	0	TRUE	0	0	0		1	0	0	TRUE	0	0	0		Inconclusive
CHEMBL1091218	0	0	0		1	0	0	TRUE	0	0	0		1	0	0	TRUE	0	0	0		Inconclusive
CHEMBL1091505	0	0	1	TRUE	0	0	0		0	0	0		0	0	0		0	0	0		Inconclusive
CHEMBL1091506	1	0	0	TRUE	0	0	0		0	0	0		0	0	0		0	0	0		Inconclusive
CHEMBL1091507	0	0	1	TRUE	0	0	0		0	0	0		0	0	0		0	0	0		Inconclusive
CHEMBL1091508	0	0	1	TRUE	0	0	0		0	0	0		0	0	0		0	0	0		Inconclusive
CHEMBL1091511	0	0	1	TRUE	0	0	0		0	0	0		0	0	0		0	0	0		Inconclusive
CHEMBL1091512	1	0	0	TRUE	0	0	0		0	0	0		0	0	0		0	0	0		Inconclusive
CHEMBL1091523	1	0	0	TRUE	1	0	0	TRUE	0	0	0		0	0	0		0	0	0		Active
CHEMBL1091530	1	0	0	TRUE	1	0	0	TRUE	0	0	0		0	0	0		0	0	0		Active
CHEMBL1091572	1	0	0	TRUE	1	0	0	TRUE	0	0	0		0	0	0		0	0	0		Active
CHEMBL1091573	0	0	0		0	0	0		0	1	0	TRUE	0	0	0		0	0	0		Inactive
CHEMBL1091664	0	0	0		1	0	0	TRUE	0	0	0		1	0	0	TRUE	0	0	0		Inconclusive
CHEMBL1091839	1	0	0	TRUE	0	0	0		0	0	0		0	0	0		0	0	0		Inconclusive
CHEMBL1091840	0	1	0	TRUE	0	0	0		0	0	0		0	0	0		0	0	0		Inactive
CHEMBL1091866	1	0	0	TRUE	1	0	0	TRUE	0	0	0		0	0	0		0	0	0		Active
CHEMBL1091980	0	0	0		1	0	0	TRUE	0	0	0		1	0	0	TRUE	0	0	0		Inconclusive
CHEMBL1092015	1	0	0	TRUE	0	0	0		0	0	0		0	0	0		0	0	0		Inconclusive
CHEMBL1092235	0	0	0		1	0	0	TRUE	0	0	0		1	0	0	TRUE	0	0	0		Inconclusive
CHEMBL1092236	0	0	0		1	0	0	TRUE	0	0	0		1	0	0	TRUE	0	0	0		Inconclusive
CHEMBL1092237	0	0	0		1	0	0	TRUE	0	0	0		1	0	0	TRUE	0	0	0		Inconclusive
CHEMBL1092387	1	0	0	TRUE	1	0	0	TRUE	0	0	0		1	0	0	TRUE	0	0	0		Active
CHEMBL109241	0	0	0		1	0	0	TRUE	0	0	0		1	0	0	TRUE	0	0	0		Inconclusive
CHEMBL1092559	1	0	0	TRUE	1	0	0	TRUE	0	0	0		0	0	0		0	0	0		Active
CHEMBL1092633	1	0	0	TRUE	1	0	0	TRUE	0	0	0		0	0	0		0	0	0		Active
CHEMBL1092634	1	0	0	TRUE	1	0	0	TRUE	0	0	0		0	0	0		0	0	0		Active
CHEMBL1092834	1	0	0	TRUE	0	0	0		0	0	0		0	0	0		0	0	0		Inconclusive
CHEMBL1092854	1	0	0	TRUE	1	0	0	TRUE	0	0	0		0	0	0		0	0	0		Active
CHEMBL1092855	1	0	0	TRUE	1	0	0	TRUE	0	0	0		0	0	0		0	0	0		Active
CHEMBL1092876	1	0	0	TRUE	0	0	1	TRUE	0	0	0		0	0	0		0	0	0		Inconclusive
CHEMBL1092900	1	0	0	TRUE	1	0	0	TRUE	0	0	0		0	0	0		0	0	0		Active
CHEMBL1092931	0	0	0		1	0	0	TRUE	0	0	0		1	0	0	TRUE	0	0	0		Inconclusive
CHEMBL1092932	0	0	0		1	0	0	TRUE	0	0	0		0	0	0		0	0	0		Inconclusive
CHEMBL1092995	1	0	0	TRUE	0	0	0		0	0	0		0	0	0		0	0	0		Inconclusive
CHEMBL1092997	1	0	0	TRUE	0	0	0		0	0	0		0	0	0		0	0	0		Inconclusive
CHEMBL1092998	1	0	0	TRUE	0	0	0		0	0	0		0	0	0		0	0	0		Inconclusive
CHEMBL1093102	1	0	0	TRUE	0	0	0		0	0	0		0	0	0		0	0	0		Inconclusive
CHEMBL1093103	0	0	1	TRUE	0	0	0		0	0	0		0	0	0		0	0	0		Inconclusive
CHEMBL1093404	0	0	1	TRUE	0	0	0		0	0	0		0	0	0		0	0	0		Inconclusive
CHEMBL1093405	1	0	0	TRUE	0	0	0		0	0	0		1	0	0	TRUE	0	0	0		Active
CHEMBL1093410	0	1	0	TRUE	0	0	0		0	0	0		0	0	0		0	0	0		Inactive
CHEMBL1093411	0	0	1	TRUE	0	0	0		0	0	0		0	0	0		0	0	0		Inconclusive
CHEMBL1093414	1	0	0	TRUE	0	0	0		0	0	0		0	0	0		0	0	0		Inconclusive
CHEMBL1093415	1	0	0	TRUE	0	0	0		0	0	0		0	0	0		0	0	0		Inconclusive
CHEMBL1093768	1	0	0	TRUE	0	0	0		0	0	0		0	0	0		0	0	0		Inconclusive
CHEMBL1093769	1	0	0	TRUE	0	0	0		0	0	0		0	0	0		0	0	0		Inconclusive
CHEMBL109638	0	0	0		1	0	0	TRUE	0	0	0		1	0	0	TRUE	0	0	0		Inconclusive
CHEMBL1096557	0	0	0		0	0	0		2	0	0	TRUE	0	0	0		0	0	0		Inconclusive
CHEMBL1096936	0	0	0		0	0	0		2	0	0	TRUE	0	0	0		0	0	0		Inconclusive
CHEMBL1097193	1	0	0	TRUE	1	0	0	TRUE	0	0	0		0	0	0		0	0	0		Active
CHEMBL1097194	1	0	0	TRUE	1	0	0	TRUE	0	0	0		0	0	0		0	0	0		Active
CHEMBL1097195	1	0	0	TRUE	0	0	1	TRUE	0	0	0		0	0	0		0	0	0		Inconclusive
CHEMBL109731	0	0	0		1	0	0	TRUE	0	0	0		1	0	0	TRUE	0	0	0		Inconclusive
CHEMBL1097687	0	0	0		0	0	0		0	1	0	TRUE	0	0	0		0	0	0		Inactive
CHEMBL1098027	1	0	0	TRUE	1	0	0	TRUE	0	0	0		0	0	0		0	0	0		Active
CHEMBL1098368	0	0	0		0	0	0		0	1	0	TRUE	0	0	0		0	0	0		Inactive
CHEMBL109975	0	0	0		1	0	0	TRUE	0	0	0		1	0	0	TRUE	0	0	0		Inconclusive
CHEMBL110071	0	0	0		1	0	0	TRUE	0	0	0		1	0	0	TRUE	0	0	0		Inconclusive
CHEMBL110371	1	0	0	TRUE	0	0	0		0	0	0		0	0	0		0	0	0		Inconclusive
CHEMBL110743	0	0	0		1	0	0	TRUE	0	0	0		1	0	0	TRUE	0	0	0		Inconclusive
CHEMBL111161	0	0	0		1	0	0	TRUE	0	0	0		1	0	0	TRUE	0	0	0		Inconclusive
CHEMBL111271	0	0	0		1	0	0	TRUE	0	0	0		1	0	0	TRUE	0	0	0		Inconclusive
CHEMBL111480	0	0	0		1	0	0	TRUE	0	0	0		1	0	0	TRUE	0	0	0		Inconclusive
CHEMBL111841	0	0	0		1	0	0	TRUE	0	0	0		1	0	0	TRUE	0	0	0		Inconclusive
CHEMBL112725	0	0	0		3	0	0	TRUE	0	0	0		2	0	0	TRUE	0	0	0		Inconclusive
CHEMBL112790	0	0	0		1	0	0	TRUE	0	0	0		1	0	0	TRUE	0	0	0		Inconclusive
CHEMBL112973	0	0	0		1	0	0	TRUE	0	0	0		1	0	0	TRUE	0	0	0		Inconclusive
CHEMBL113006	0	0	0		1	0	0	TRUE	0	0	0		0	0	0		0	1	0	TRUE	Inconclusive
CHEMBL113301	0	0	1	TRUE	0	0	0		0	0	0		0	0	0		0	0	0		Inconclusive
CHEMBL113324	0	0	0		1	0	0	TRUE	0	0	0		1	0	0	TRUE	0	0	0		Inconclusive
CHEMBL113587	0	0	0		1	0	0	TRUE	0	0	0		1	0	0	TRUE	0	0	0		Inconclusive
CHEMBL114286	0	0	0		1	0	0	TRUE	0	0	0		1	0	0	TRUE	0	0	0		Inconclusive
CHEMBL115137	0	0	0		0	0	0		0	1	0	TRUE	1	0	0	TRUE	0	0	0		Inactive
CHEMBL115310	0	0	0		1	0	0	TRUE	0	0	0		1	0	0	TRUE	0	0	0		Inconclusive
CHEMBL115448	0	0	0		1	0	0	TRUE	0	0	0		1	0	0	TRUE	0	0	0		Inconclusive
CHEMBL115463	1	0	0	TRUE	1	0	0	TRUE	0	0	0		0	0	0		0	0	0		Active
CHEMBL115604	0	0	0		0	0	1	TRUE	0	0	0		0	0	1	TRUE	0	0	0		Inconclusive
CHEMBL116043	0	0	0		1	0	0	TRUE	0	0	0		1	0	0	TRUE	0	0	0		Inconclusive
CHEMBL1160899	0	0	1	TRUE	0	0	0		0	0	0		0	0	0		0	0	0		Inconclusive
CHEMBL116540	0	0	0		0	0	0		0	1	0	TRUE	0	0	0		0	0	0		Inactive
CHEMBL116671	1	0	0	TRUE	1	0	0	TRUE	0	0	0		0	0	0		0	0	0		Active
CHEMBL116920	1	0	0	TRUE	1	0	0	TRUE	0	0	0		0	0	0		0	0	0		Active
CHEMBL116947	0	0	0		1	0	0	TRUE	0	0	0		0	0	0		0	0	0		Inconclusive
CHEMBL1169685	1	0	0	TRUE	1	0	0	TRUE	0	0	0		0	0	0		0	0	0		Active
CHEMBL1169712	1	0	0	TRUE	1	0	0	TRUE	0	0	0		0	0	0		0	0	0		Active
CHEMBL1169713	1	0	0	TRUE	1	0	0	TRUE	0	0	0		0	0	0		0	0	0		Active
CHEMBL1169827	0	0	0		1	0	0	TRUE	0	0	0		0	0	0		0	0	0		Inconclusive
CHEMBL117	2	0	0	TRUE	0	0	0		0	0	0		0	0	0		0	0	0		Inconclusive
CHEMBL1170076	1	0	0	TRUE	0	0	1	TRUE	0	0	0		0	0	0		0	0	0		Inconclusive
CHEMBL1170155	0	0	0		0	0	0		0	1	0	TRUE	0	0	0		0	0	0		Inactive
CHEMBL1170264	1	0	0	TRUE	0	0	2	TRUE	0	0	0		0	0	0		0	0	0		Inconclusive
CHEMBL1170332	0	0	0		0	0	0		0	1	0	TRUE	0	0	0		0	0	0		Inactive
CHEMBL1170852	1	0	0	TRUE	0	0	1	TRUE	0	0	0		0	0	0		0	0	0		Inconclusive
CHEMBL1170853	1	0	0	TRUE	1	0	0	TRUE	0	0	0		0	0	0		0	0	0		Active
CHEMBL1171046	1	0	0	TRUE	1	0	0	TRUE	0	0	0		0	0	0		0	0	0		Active
CHEMBL1171456	1	0	0	TRUE	1	0	0	TRUE	0	0	0		0	0	0		0	0	0		Active
CHEMBL1171652	1	0	0	TRUE	0	0	0		0	0	0		0	0	0		0	0	0		Inconclusive
CHEMBL1171831	1	0	0	TRUE	1	0	0	TRUE	0	0	0		0	0	0		0	0	0		Active
CHEMBL1171832	1	0	0	TRUE	0	0	0		0	0	0		0	0	0		0	0	0		Inconclusive
CHEMBL1171833	0	0	0		0	0	0		0	1	0	TRUE	0	0	0		0	0	0		Inactive
CHEMBL1171834	2	0	0	TRUE	3	0	0	TRUE	0	0	0		0	0	0		0	0	0		Active
CHEMBL1171851	0	0	0		0	0	0		0	1	0	TRUE	0	0	0		0	0	0		Inactive
CHEMBL1171856	1	0	0	TRUE	1	0	0	TRUE	0	0	0		0	0	0		0	0	0		Active
CHEMBL1172000	1	0	0	TRUE	0	0	1	TRUE	0	0	0		0	0	0		0	0	0		Inconclusive
CHEMBL1172001	1	0	0	TRUE	1	0	0	TRUE	0	0	0		0	0	0		0	0	0		Active
CHEMBL1172002	1	0	0	TRUE	0	0	1	TRUE	0	0	0		0	0	0		0	0	0		Inconclusive
CHEMBL1172003	1	0	0	TRUE	1	0	0	TRUE	0	0	0		0	0	0		0	0	0		Active
CHEMBL1172016	1	0	0	TRUE	1	0	0	TRUE	0	0	0		0	0	0		0	0	0		Active
CHEMBL1172019	1	0	0	TRUE	1	0	0	TRUE	0	0	0		0	0	0		0	0	0		Active
CHEMBL1172222	1	0	0	TRUE	0	0	0		0	0	0		0	0	0		0	0	0		Inconclusive
CHEMBL1172424	0	0	0		1	0	0	TRUE	0	1	0	TRUE	0	0	0		0	0	0		Inconclusive
CHEMBL1172425	1	0	0	TRUE	1	0	0	TRUE	0	0	0		0	0	0		0	0	0		Active
CHEMBL1172426	1	0	0	TRUE	1	0	0	TRUE	0	0	0		0	0	0		0	0	0		Active
CHEMBL1172610	1	0	0	TRUE	1	0	0	TRUE	0	0	0		0	0	0		0	0	0		Active
CHEMBL1172833	1	0	0	TRUE	1	0	0	TRUE	0	0	0		0	0	0		0	0	0		Active
CHEMBL1172900	0	0	0		0	0	0		0	1	0	TRUE	0	0	0		0	0	0		Inactive
CHEMBL1172961	1	0	0	TRUE	1	0	0	TRUE	0	0	0		0	0	0		0	0	0		Active
CHEMBL1172962	1	0	0	TRUE	1	0	0	TRUE	0	0	0		0	0	0		0	0	0		Active
CHEMBL1172963	1	0	0	TRUE	1	0	0	TRUE	0	0	0		0	0	0		0	0	0		Active
CHEMBL1173101	1	0	0	TRUE	1	0	0	TRUE	0	0	0		0	0	0		0	0	0		Active
CHEMBL1173117	1	0	0	TRUE	1	0	0	TRUE	0	0	0		0	0	0		0	0	0		Active
CHEMBL1173118	1	0	0	TRUE	1	0	0	TRUE	0	0	0		0	0	0		0	0	0		Active
CHEMBL1173121	1	0	0	TRUE	0	0	0		0	0	0		0	0	0		0	0	0		Inconclusive
CHEMBL1173165	1	0	0	TRUE	1	0	0	TRUE	0	0	0		0	0	0		0	0	0		Active
CHEMBL1173376	1	0	0	TRUE	1	0	0	TRUE	0	0	0		0	0	0		0	0	0		Active
CHEMBL1173499	1	0	0	TRUE	1	0	0	TRUE	0	0	0		0	0	0		0	0	0		Active
CHEMBL1173559	1	0	0	TRUE	1	0	0	TRUE	0	0	0		0	0	0		0	0	0		Active
CHEMBL1173564	1	0	0	TRUE	0	0	0		0	0	0		0	0	0		0	0	0		Inconclusive
CHEMBL1173623	1	0	0	TRUE	1	0	0	TRUE	0	0	0		0	0	0		0	0	0		Active
CHEMBL117402	0	0	1	TRUE	1	0	0	TRUE	0	0	0		0	0	0		0	0	0		Inconclusive
CHEMBL117578	0	0	0		1	0	0	TRUE	0	0	0		1	0	0	TRUE	0	0	0		Inconclusive
CHEMBL117738	0	0	0		1	0	0	TRUE	0	0	0		1	0	0	TRUE	0	0	0		Inconclusive
CHEMBL117764	0	0	1	TRUE	1	0	0	TRUE	0	0	0		0	0	0		0	0	0		Inconclusive
CHEMBL117796	1	0	0	TRUE	1	0	0	TRUE	0	0	0		0	0	0		0	0	0		Active
CHEMBL118198	0	0	0		1	0	0	TRUE	0	0	0		0	0	0		0	0	0		Inconclusive
CHEMBL118251	0	0	0		1	0	0	TRUE	0	0	0		1	0	0	TRUE	0	0	0		Inconclusive
CHEMBL118274	1	0	0	TRUE	1	0	0	TRUE	0	0	0		0	0	0		0	0	0		Active
CHEMBL118279	0	0	0		1	0	0	TRUE	0	0	0		0	0	0		0	0	0		Inconclusive
CHEMBL118329	0	0	0		0	0	0		0	1	0	TRUE	0	0	0		0	0	0		Inactive
CHEMBL118413	0	0	0		0	0	0		0	2	0	TRUE	0	0	0		0	0	0		Inactive
CHEMBL118483	0	0	0		1	0	0	TRUE	0	0	0		0	0	0		0	0	0		Inconclusive
CHEMBL118492	0	0	0		0	0	0		0	1	0	TRUE	0	0	0		0	0	0		Inactive
CHEMBL118546	0	0	0		1	0	0	TRUE	0	0	0		1	0	0	TRUE	0	0	0		Inconclusive
CHEMBL118576	0	0	0		0	0	0		0	2	0	TRUE	0	0	0		0	0	0		Inactive
CHEMBL118577	1	0	0	TRUE	1	0	0	TRUE	0	0	0		0	0	0		0	0	0		Active
CHEMBL118617	0	0	0		1	0	0	TRUE	0	0	0		1	0	0	TRUE	0	0	0		Inconclusive
CHEMBL118756	0	0	0		1	0	0	TRUE	0	0	0		1	0	0	TRUE	0	0	0		Inconclusive
CHEMBL118816	1	0	0	TRUE	1	0	0	TRUE	0	0	0		0	0	0		0	0	0		Active
CHEMBL118852	0	0	0		1	0	0	TRUE	0	0	0		1	0	0	TRUE	0	0	0		Inconclusive
CHEMBL118880	0	0	0		0	0	0		0	2	0	TRUE	0	0	0		0	0	0		Inactive
CHEMBL118887	0	0	0		1	0	0	TRUE	0	0	0		1	0	0	TRUE	0	0	0		Inconclusive
CHEMBL118900	0	0	0		0	0	0		0	1	0	TRUE	0	0	0		0	0	0		Inactive
CHEMBL118939	0	0	0		4	0	0	TRUE	0	0	0		0	0	0		0	0	0		Inconclusive
CHEMBL118972	0	0	0		1	0	0	TRUE	0	0	0		1	0	0	TRUE	0	0	0		Inconclusive
CHEMBL118976	0	0	0		0	0	0		0	1	0	TRUE	0	0	0		0	0	0		Inactive
CHEMBL118977	0	0	0		0	0	0		0	2	0	TRUE	0	0	0		0	0	0		Inactive
CHEMBL119030	0	0	0		1	0	0	TRUE	0	0	0		1	0	0	TRUE	0	0	0		Inconclusive
CHEMBL119066	0	0	0		1	0	0	TRUE	0	0	0		1	0	0	TRUE	0	0	0		Inconclusive
CHEMBL119078	0	0	0		1	0	0	TRUE	0	0	0		1	0	0	TRUE	0	0	0		Inconclusive
CHEMBL119097	1	0	0	TRUE	1	0	0	TRUE	0	0	0		0	0	0		0	0	0		Active
CHEMBL119111	0	0	0		1	0	0	TRUE	0	0	0		1	0	0	TRUE	0	0	0		Inconclusive
CHEMBL119217	1	0	0	TRUE	1	0	0	TRUE	0	0	0		0	0	0		0	0	0		Active
CHEMBL119278	0	0	0		1	0	0	TRUE	0	0	0		1	0	0	TRUE	0	0	0		Inconclusive
CHEMBL119496	0	0	0		1	0	0	TRUE	0	0	0		1	0	0	TRUE	0	0	0		Inconclusive
CHEMBL119646	0	0	0		1	0	0	TRUE	0	0	0		1	0	0	TRUE	0	0	0		Inconclusive
CHEMBL119709	1	0	0	TRUE	0	0	0		0	0	0		0	0	0		0	0	0		Inconclusive
CHEMBL119791	0	0	0		1	0	0	TRUE	0	0	0		0	0	0		0	0	0		Inconclusive
CHEMBL119795	1	0	0	TRUE	1	0	0	TRUE	0	0	0		0	0	0		0	0	0		Active
CHEMBL119798	0	0	0		1	0	0	TRUE	0	0	0		1	0	0	TRUE	0	0	0		Inconclusive
CHEMBL119869	0	0	0		1	0	0	TRUE	0	0	0		1	0	0	TRUE	0	0	0		Inconclusive
CHEMBL119911	0	0	0		0	0	0		0	2	0	TRUE	0	0	0		0	0	0		Inactive
CHEMBL119962	0	0	0		0	0	0		0	1	0	TRUE	0	0	0		0	0	0		Inactive
CHEMBL120009	0	0	0		3	0	0	TRUE	0	0	0		0	0	0		0	0	0		Inconclusive
CHEMBL120045	0	0	0		0	0	0		0	2	0	TRUE	0	0	0		0	0	0		Inactive
CHEMBL120243	0	0	0		0	0	0		0	1	0	TRUE	0	0	0		0	0	0		Inactive
CHEMBL120244	0	0	0		0	0	0		0	1	0	TRUE	0	0	0		0	0	0		Inactive
CHEMBL120246	0	0	0		0	0	0		0	2	0	TRUE	0	0	0		0	0	0		Inactive
CHEMBL120444	0	0	0		0	0	0		0	1	0	TRUE	0	0	0		0	0	0		Inactive
CHEMBL1204498	2	0	0	TRUE	2	0	0	TRUE	0	0	0		1	0	0	TRUE	0	0	0		Active
CHEMBL120456	0	0	0		0	0	0		0	2	0	TRUE	0	0	0		0	0	0		Inactive
CHEMBL120570	0	0	0		1	0	0	TRUE	0	0	0		1	0	0	TRUE	0	0	0		Inconclusive
CHEMBL120574	0	0	0		0	0	0		0	2	0	TRUE	0	0	0		0	0	0		Inactive
CHEMBL120611	0	0	0		0	0	0		0	1	0	TRUE	0	0	0		0	0	0		Inactive
CHEMBL120620	0	0	0		0	0	0		0	1	0	TRUE	0	0	0		0	0	0		Inactive
CHEMBL120676	0	0	0		0	0	0		0	1	0	TRUE	0	0	0		0	0	0		Inactive
CHEMBL120744	0	0	0		2	0	0	TRUE	0	0	0		0	0	0		0	0	0		Inconclusive
CHEMBL120748	0	0	0		0	0	0		0	1	0	TRUE	0	0	0		0	0	0		Inactive
CHEMBL1209109	0	1	0	TRUE	1	0	0	TRUE	0	0	0		0	0	0		0	0	0		Inconclusive
CHEMBL1209170	1	0	0	TRUE	0	0	0		0	0	0		0	0	0		0	0	0		Inconclusive
CHEMBL1209173	0	1	0	TRUE	1	0	0	TRUE	0	0	0		0	0	0		0	0	0		Inconclusive
CHEMBL121	63	0	0	TRUE	98	0	2	FALSE	9	0	0	TRUE	64	0	0	TRUE	2	0	0	TRUE	Active
CHEMBL121206	0	0	0		1	0	0	TRUE	0	0	0		1	0	0	TRUE	0	0	0		Inconclusive
CHEMBL1214744	3	0	0	TRUE	3	0	0	TRUE	0	0	1	TRUE	0	0	0		0	0	0		Active
CHEMBL1214745	1	0	0	TRUE	1	0	0	TRUE	0	0	0		0	0	0		0	0	0		Active
CHEMBL1214823	1	0	0	TRUE	1	0	0	TRUE	0	0	0		0	0	0		0	0	0		Active
CHEMBL1214824	1	0	0	TRUE	1	0	0	TRUE	0	0	0		0	0	0		0	0	0		Active
CHEMBL1214825	1	0	0	TRUE	1	0	0	TRUE	0	0	0		0	0	0		0	0	0		Active
CHEMBL1214826	2	0	0	TRUE	2	0	0	TRUE	0	0	0		0	0	0		0	0	0		Active
CHEMBL1214886	1	0	0	TRUE	1	0	0	TRUE	0	0	0		0	0	0		0	0	0		Active
CHEMBL1214887	2	0	0	TRUE	2	0	0	TRUE	0	0	0		0	0	0		0	0	0		Active
CHEMBL1214888	1	0	0	TRUE	1	0	0	TRUE	0	0	0		0	0	0		0	0	0		Active
CHEMBL121719	0	0	0		1	0	0	TRUE	0	0	0		0	0	0		0	0	0		Inconclusive
CHEMBL122009	0	0	0		2	0	0	TRUE	0	0	0		0	0	0		0	0	0		Inconclusive
CHEMBL122070	0	0	0		1	0	0	TRUE	0	0	0		0	0	0		0	0	0		Inconclusive
CHEMBL1221640	0	0	0		0	0	0		0	1	0	TRUE	0	0	0		0	0	0		Inactive
CHEMBL1221641	0	0	0		0	0	0		0	3	0	TRUE	0	0	0		0	0	0		Inactive
CHEMBL1221642	0	0	0		0	0	0		0	1	0	TRUE	0	0	0		0	0	0		Inactive
CHEMBL1222408	0	0	0		1	0	0	TRUE	0	0	0		0	0	0		0	0	0		Inconclusive
CHEMBL1223740	0	0	0		0	0	0		1	0	0	TRUE	0	0	0		0	0	0		Inconclusive
CHEMBL1223741	0	0	0		0	0	0		1	0	0	TRUE	0	0	0		0	0	0		Inconclusive
CHEMBL1223742	0	0	0		0	0	0		1	0	0	TRUE	0	0	0		0	0	0		Inconclusive
CHEMBL1223743	0	0	0		0	0	0		1	0	0	TRUE	0	0	0		0	0	0		Inconclusive
CHEMBL122417	0	0	0		1	0	0	TRUE	0	0	0		1	0	0	TRUE	0	0	0		Inconclusive
CHEMBL122418	0	0	0		1	0	0	TRUE	0	0	0		1	0	0	TRUE	0	0	0		Inconclusive
CHEMBL1229938	0	0	0		0	0	0		0	2	0	TRUE	0	0	0		0	0	0		Inactive
CHEMBL1230353	1	0	0	TRUE	1	0	0	TRUE	0	0	0		2	0	0	TRUE	0	0	0		Active
CHEMBL1231733	1	0	0	TRUE	1	0	0	TRUE	0	0	0		0	0	0		0	0	0		Active
CHEMBL1231797	1	0	0	TRUE	0	0	0		0	0	0		0	0	0		0	0	0		Inconclusive
CHEMBL123257	0	0	0		1	0	0	TRUE	0	0	0		0	0	0		0	0	0		Inconclusive
CHEMBL123268	0	0	0		0	0	1	TRUE	0	0	0		0	0	0		0	0	0		Inconclusive
CHEMBL1235252	0	0	0		0	0	0		2	0	0	TRUE	0	0	0		0	0	0		Inconclusive
CHEMBL123579	0	0	0		0	0	1	TRUE	0	0	0		0	0	0		0	0	0		Inconclusive
CHEMBL1236924	2	0	0	TRUE	2	0	0	TRUE	0	0	0		2	0	0	TRUE	0	0	0		Active
CHEMBL123749	0	0	0		1	0	0	TRUE	0	0	0		0	0	0		0	0	0		Inconclusive
CHEMBL124079	0	0	0		1	0	0	TRUE	0	0	0		0	0	0		0	0	0		Inconclusive
CHEMBL124421	0	0	0		1	0	0	TRUE	0	0	0		0	0	0		0	0	0		Inconclusive
CHEMBL124790	0	0	0		0	0	1	TRUE	0	0	0		0	0	0		0	0	0		Inconclusive
CHEMBL124842	0	0	0		1	0	0	TRUE	0	0	0		0	0	0		0	0	0		Inconclusive
CHEMBL125176	0	0	0		1	0	0	TRUE	0	0	0		0	0	0		0	0	0		Inconclusive
CHEMBL125177	0	0	0		1	0	0	TRUE	0	0	0		0	0	0		0	0	0		Inconclusive
CHEMBL125230	0	0	0		1	0	0	TRUE	0	0	0		0	0	0		0	0	0		Inconclusive
CHEMBL125363	0	0	0		1	0	0	TRUE	0	0	0		0	0	0		0	0	0		Inconclusive
CHEMBL1254672	0	0	0		0	0	0		0	2	0	TRUE	0	0	0		0	0	0		Inactive
CHEMBL1254673	0	0	0		0	0	0		0	2	0	TRUE	0	0	0		0	0	0		Inactive
CHEMBL1254756	0	0	0		0	0	0		0	2	0	TRUE	0	0	0		0	0	0		Inactive
CHEMBL125659	0	0	0		1	0	0	TRUE	0	0	0		0	0	0		0	0	0		Inconclusive
CHEMBL125894	0	0	0		1	0	0	TRUE	0	0	0		0	0	0		0	0	0		Inconclusive
CHEMBL125895	0	0	0		1	0	0	TRUE	0	0	0		0	0	0		0	0	0		Inconclusive
CHEMBL129118	1	0	0	TRUE	0	0	0		0	0	0		0	0	0		0	0	0		Inconclusive
CHEMBL129741	1	0	0	TRUE	0	0	0		0	0	0		0	0	0		0	0	0		Inconclusive
CHEMBL129795	1	0	1	FALSE	0	0	0		0	0	0		0	0	0		0	0	0		Inconclusive
CHEMBL129991	0	0	0		0	0	1	TRUE	0	0	0		0	0	0		0	0	0		Inconclusive
CHEMBL130349	0	0	1	TRUE	0	0	0		0	0	0		0	0	0		0	0	0		Inconclusive
CHEMBL130493	0	0	0		0	0	0		0	1	0	TRUE	0	0	0		0	0	0		Inactive
CHEMBL130579	0	0	0		1	0	0	TRUE	0	0	0		0	0	0		0	0	0		Inconclusive
CHEMBL130919	1	0	0	TRUE	0	0	0		0	0	0		0	0	0		0	0	0		Inconclusive
CHEMBL130939	1	0	0	TRUE	0	0	0		0	0	0		0	0	0		0	0	0		Inconclusive
CHEMBL1310983	1	0	0	TRUE	0	0	0		0	0	0		0	0	0		0	0	0		Inconclusive
CHEMBL131153	0	0	0		0	0	0		0	1	0	TRUE	0	0	0		0	0	0		Inactive
CHEMBL131329	1	0	0	TRUE	0	0	0		0	0	0		0	0	0		0	0	0		Inconclusive
CHEMBL131450	0	0	0		1	0	0	TRUE	0	0	0		0	0	0		0	0	0		Inconclusive
CHEMBL131694	0	0	0		1	0	0	TRUE	0	0	0		0	0	0		0	0	0		Inconclusive
CHEMBL132134	0	0	0		0	0	0		0	1	0	TRUE	0	0	0		0	0	0		Inactive
CHEMBL132390	1	0	0	TRUE	0	0	0		0	0	0		0	0	0		0	0	0		Inconclusive
CHEMBL132623	0	0	0		0	0	0		0	1	0	TRUE	0	0	0		0	0	0		Inactive
CHEMBL133045	0	0	0		0	0	0		0	1	0	TRUE	0	0	0		0	0	0		Inactive
CHEMBL133046	0	0	0		0	0	0		0	1	0	TRUE	0	0	0		0	0	0		Inactive
CHEMBL133334	0	0	0		1	0	0	TRUE	0	0	0		0	0	0		0	0	0		Inconclusive
CHEMBL133351	0	0	0		0	0	0		0	1	0	TRUE	0	0	0		0	0	0		Inactive
CHEMBL133645	0	0	0		0	0	0		0	1	0	TRUE	0	0	0		0	0	0		Inactive
CHEMBL133882	0	0	0		0	0	0		0	1	0	TRUE	0	0	0		0	0	0		Inactive
CHEMBL133917	0	0	0		1	0	0	TRUE	0	0	0		0	0	0		0	0	0		Inconclusive
CHEMBL134031	0	0	0		0	0	0		0	1	0	TRUE	0	0	0		0	0	0		Inactive
CHEMBL134093	0	0	0		1	0	0	TRUE	0	0	0		0	0	0		0	0	0		Inconclusive
CHEMBL134146	0	0	0		1	0	0	TRUE	0	0	0		0	0	0		0	0	0		Inconclusive
CHEMBL134174	0	0	0		0	0	0		0	1	0	TRUE	0	0	0		0	0	0		Inactive
CHEMBL134249	0	0	0		0	0	0		0	1	0	TRUE	0	0	0		0	0	0		Inactive
CHEMBL13486	2	0	0	TRUE	0	0	0		0	0	0		0	0	0		0	0	0		Inconclusive
CHEMBL1362332	0	0	0		0	0	0		0	1	0	TRUE	0	0	0		0	0	0		Inactive
CHEMBL1370400	0	0	1	TRUE	0	0	0		0	0	0		0	0	0		0	0	0		Inconclusive
CHEMBL139	1	0	0	TRUE	0	0	0		0	0	0		0	0	0		0	0	0		Inconclusive
CHEMBL1401508	0	0	0		0	0	0		0	1	0	TRUE	0	0	0		0	0	0		Inactive
CHEMBL1410398	0	0	0		0	0	0		0	1	0	TRUE	0	0	0		0	0	0		Inactive
CHEMBL144112	1	0	0	TRUE	1	0	0	TRUE	0	0	0		0	0	0		0	0	0		Active
CHEMBL144489	2	0	0	TRUE	2	0	0	TRUE	0	0	0		0	0	0		0	0	0		Active
CHEMBL144877	0	0	0		1	0	0	TRUE	0	0	0		1	0	0	TRUE	0	0	0		Inconclusive
CHEMBL145824	0	0	0		1	0	0	TRUE	0	0	0		1	0	0	TRUE	0	0	0		Inconclusive
CHEMBL145829	0	0	0		1	0	0	TRUE	0	0	0		1	0	0	TRUE	0	0	0		Inconclusive
CHEMBL145886	0	0	0		1	0	0	TRUE	0	0	0		1	0	0	TRUE	0	0	0		Inconclusive
CHEMBL145929	0	0	0		0	0	0		0	1	0	TRUE	1	0	0	TRUE	0	0	0		Inactive
CHEMBL145938	0	0	0		1	0	0	TRUE	0	0	0		1	0	0	TRUE	0	0	0		Inconclusive
CHEMBL145941	0	0	0		1	0	0	TRUE	0	0	0		2	0	0	TRUE	0	0	0		Inconclusive
CHEMBL145958	0	0	0		1	0	0	TRUE	0	0	0		1	0	0	TRUE	0	0	0		Inconclusive
CHEMBL146027	0	0	0		0	0	0		0	1	0	TRUE	1	0	0	TRUE	0	0	0		Inactive
CHEMBL146123	0	0	0		1	0	0	TRUE	0	0	0		1	0	0	TRUE	0	0	0		Inconclusive
CHEMBL146201	0	0	0		1	0	0	TRUE	0	0	0		1	0	0	TRUE	0	0	0		Inconclusive
CHEMBL146217	0	0	0		1	0	0	TRUE	0	0	0		1	0	0	TRUE	0	0	0		Inconclusive
CHEMBL146231	0	0	0		1	0	0	TRUE	0	0	0		1	0	0	TRUE	0	0	0		Inconclusive
CHEMBL146243	0	0	0		0	0	0		0	1	0	TRUE	1	0	0	TRUE	0	0	0		Inactive
CHEMBL146258	0	0	0		1	0	0	TRUE	0	0	0		1	0	0	TRUE	0	0	0		Inconclusive
CHEMBL146301	0	0	0		1	0	0	TRUE	0	0	0		1	0	0	TRUE	0	0	0		Inconclusive
CHEMBL146322	0	0	0		1	0	0	TRUE	0	0	0		1	0	0	TRUE	0	0	0		Inconclusive
CHEMBL146355	0	0	0		1	0	0	TRUE	0	0	0		1	0	0	TRUE	0	0	0		Inconclusive
CHEMBL146530	0	0	0		1	0	0	TRUE	0	0	0		1	0	0	TRUE	0	0	0		Inconclusive
CHEMBL146562	0	0	0		1	0	0	TRUE	0	0	0		1	0	0	TRUE	0	0	0		Inconclusive
CHEMBL146579	0	0	0		1	0	0	TRUE	0	0	0		1	0	0	TRUE	0	0	0		Inconclusive
CHEMBL146584	0	0	0		1	0	0	TRUE	0	0	0		1	0	0	TRUE	0	0	0		Inconclusive
CHEMBL146614	0	0	0		1	0	0	TRUE	0	0	0		1	0	0	TRUE	0	0	0		Inconclusive
CHEMBL146637	0	0	0		1	0	0	TRUE	0	0	0		1	0	0	TRUE	0	0	0		Inconclusive
CHEMBL146650	0	0	0		1	0	0	TRUE	0	0	0		1	0	0	TRUE	0	0	0		Inconclusive
CHEMBL146687	0	0	0		1	0	0	TRUE	0	0	0		1	0	0	TRUE	0	0	0		Inconclusive
CHEMBL146806	0	0	0		1	0	0	TRUE	0	0	0		1	0	0	TRUE	0	0	0		Inconclusive
CHEMBL146821	0	0	0		1	0	0	TRUE	0	0	0		1	0	0	TRUE	0	0	0		Inconclusive
CHEMBL146822	0	0	0		1	0	0	TRUE	0	0	0		1	0	0	TRUE	0	0	0		Inconclusive
CHEMBL147021	0	0	0		1	0	0	TRUE	0	0	0		1	0	0	TRUE	0	0	0		Inconclusive
CHEMBL147042	0	0	0		0	0	0		0	1	0	TRUE	1	0	0	TRUE	0	0	0		Inactive
CHEMBL147090	0	0	0		1	0	0	TRUE	0	0	0		1	0	0	TRUE	0	0	0		Inconclusive
CHEMBL147095	0	0	0		1	0	0	TRUE	0	0	0		1	0	0	TRUE	0	0	0		Inconclusive
CHEMBL147282	0	0	0		1	0	0	TRUE	0	0	0		1	0	0	TRUE	0	0	0		Inconclusive
CHEMBL147384	0	0	0		1	0	0	TRUE	0	0	0		1	0	0	TRUE	0	0	0		Inconclusive
CHEMBL147419	0	0	0		1	0	0	TRUE	0	0	0		1	0	0	TRUE	0	0	0		Inconclusive
CHEMBL147492	0	0	0		1	0	0	TRUE	0	0	0		2	0	0	TRUE	0	0	0		Inconclusive
CHEMBL147599	0	0	0		1	0	0	TRUE	0	0	0		2	0	0	TRUE	0	0	0		Inconclusive
CHEMBL147608	0	0	0		1	0	0	TRUE	0	0	0		1	0	0	TRUE	0	0	0		Inconclusive
CHEMBL147694	0	0	0		1	0	0	TRUE	0	0	0		1	0	0	TRUE	0	0	0		Inconclusive
CHEMBL147721	1	0	0	TRUE	1	0	0	TRUE	0	0	0		0	0	0		0	0	0		Active
CHEMBL147770	0	0	0		1	0	0	TRUE	0	0	0		1	0	0	TRUE	0	0	0		Inconclusive
CHEMBL147826	0	0	0		1	0	0	TRUE	0	0	0		1	0	0	TRUE	0	0	0		Inconclusive
CHEMBL147912	0	0	0		1	0	0	TRUE	0	0	0		1	0	0	TRUE	0	0	0		Inconclusive
CHEMBL147935	0	0	0		1	0	0	TRUE	0	0	0		1	0	0	TRUE	0	0	0		Inconclusive
CHEMBL148060	0	0	0		1	0	0	TRUE	0	0	0		1	0	0	TRUE	0	0	0		Inconclusive
CHEMBL148300	0	0	0		1	0	0	TRUE	0	0	0		1	0	0	TRUE	0	0	0		Inconclusive
CHEMBL148301	0	0	0		1	0	0	TRUE	0	0	0		1	0	0	TRUE	0	0	0		Inconclusive
CHEMBL148319	2	0	0	TRUE	1	0	0	TRUE	0	0	0		0	0	0		0	0	0		Active
CHEMBL148384	0	0	0		1	0	0	TRUE	0	0	0		1	0	0	TRUE	0	0	0		Inconclusive
CHEMBL148459	0	0	0		1	0	0	TRUE	0	0	0		1	0	0	TRUE	0	0	0		Inconclusive
CHEMBL148596	0	0	0		1	0	0	TRUE	0	0	0		1	0	0	TRUE	0	0	0		Inconclusive
CHEMBL148639	0	0	0		1	0	0	TRUE	0	0	0		1	0	0	TRUE	0	0	0		Inconclusive
CHEMBL148668	0	0	0		1	0	0	TRUE	0	0	0		1	0	0	TRUE	0	0	0		Inconclusive
CHEMBL148797	0	0	0		1	0	0	TRUE	0	0	0		1	0	0	TRUE	0	0	0		Inconclusive
CHEMBL148856	0	0	0		1	0	0	TRUE	0	0	0		0	0	0		0	0	0		Inconclusive
CHEMBL148950	0	0	0		1	0	0	TRUE	0	0	0		1	0	0	TRUE	0	0	0		Inconclusive
CHEMBL149147	0	0	0		1	0	0	TRUE	0	0	0		1	0	0	TRUE	0	0	0		Inconclusive
CHEMBL149309	0	0	0		1	0	0	TRUE	0	0	0		1	0	0	TRUE	0	0	0		Inconclusive
CHEMBL149381	0	0	0		1	0	0	TRUE	0	0	0		1	0	0	TRUE	0	0	0		Inconclusive
CHEMBL149438	0	0	0		1	0	0	TRUE	0	0	0		1	0	0	TRUE	0	0	0		Inconclusive
CHEMBL149605	0	0	0		1	0	0	TRUE	0	0	0		2	0	0	TRUE	0	0	0		Inconclusive
CHEMBL149609	0	0	0		0	0	0		0	1	0	TRUE	1	0	0	TRUE	0	0	0		Inactive
CHEMBL149647	0	0	0		1	0	0	TRUE	0	0	0		1	0	0	TRUE	0	0	0		Inconclusive
CHEMBL149676	0	0	0		1	0	0	TRUE	0	0	0		1	0	0	TRUE	0	0	0		Inconclusive
CHEMBL149677	0	0	0		1	0	0	TRUE	0	0	0		2	0	0	TRUE	0	0	0		Inconclusive
CHEMBL149714	0	0	0		1	0	0	TRUE	0	0	0		1	0	0	TRUE	0	0	0		Inconclusive
CHEMBL149715	0	0	0		1	0	0	TRUE	0	0	0		1	0	0	TRUE	0	0	0		Inconclusive
CHEMBL149780	0	0	0		1	0	0	TRUE	0	0	0		1	0	0	TRUE	0	0	0		Inconclusive
CHEMBL149835	0	0	0		1	0	0	TRUE	0	0	0		1	0	0	TRUE	0	0	0		Inconclusive
CHEMBL149876	0	0	0		1	0	0	TRUE	0	0	0		1	0	0	TRUE	0	0	0		Inconclusive
CHEMBL150	1	0	0	TRUE	0	0	0		0	1	0	TRUE	0	0	0		0	0	0		Inconclusive
CHEMBL150215	0	0	0		1	0	0	TRUE	0	0	0		1	0	0	TRUE	0	0	0		Inconclusive
CHEMBL150232	0	0	0		1	0	0	TRUE	0	0	0		1	0	0	TRUE	0	0	0		Inconclusive
CHEMBL153057	1	0	0	TRUE	2	0	0	TRUE	0	6	0	TRUE	0	0	0		0	2	0	TRUE	Inconclusive
CHEMBL15770	1	0	0	TRUE	0	0	0		0	0	0		0	0	0		0	0	0		Inconclusive
CHEMBL1587731	0	0	1	TRUE	0	0	0		0	0	0		0	0	0		0	0	0		Inconclusive
CHEMBL1629909	0	0	0		0	0	0		0	0	0	TRUE	0	0	0		0	0	0		Inconclusive
CHEMBL1629915	0	0	0		0	0	0		0	0	0	TRUE	0	0	0		0	0	0		Inconclusive
CHEMBL1629930	0	0	0		1	0	0	TRUE	1	0	0	TRUE	1	0	0	TRUE	0	0	0		Inconclusive
CHEMBL1630380	0	0	0		1	0	0	TRUE	0	0	0		0	0	0		0	0	0		Inconclusive
CHEMBL1630381	0	0	0		1	0	0	TRUE	0	0	0		0	0	0		0	0	0		Inconclusive
CHEMBL1630382	0	0	0		1	0	0	TRUE	0	0	0		0	0	0		0	0	0		Inconclusive
CHEMBL1630383	0	0	0		1	0	0	TRUE	0	0	0		0	0	0		0	0	0		Inconclusive
CHEMBL1630384	0	0	0		1	0	0	TRUE	0	0	0		0	0	0		0	0	0		Inconclusive
CHEMBL1630385	0	0	0		1	0	0	TRUE	0	0	0		0	0	0		0	0	0		Inconclusive
CHEMBL1630386	0	0	0		1	0	0	TRUE	0	0	0		0	0	0		0	0	0		Inconclusive
CHEMBL1641607	1	0	0	TRUE	0	0	0		0	0	0		0	0	0		0	0	0		Inconclusive
CHEMBL1641708	1	0	1	FALSE	0	0	1	TRUE	0	0	0		0	0	0		0	0	0		Inconclusive
CHEMBL1641709	1	0	0	TRUE	0	0	0		0	0	0		0	0	0		0	0	0		Inconclusive
CHEMBL1641710	2	0	0	TRUE	1	0	0	TRUE	0	0	0		0	0	0		0	0	0		Active
CHEMBL1641711	0	0	1	TRUE	0	0	0		0	0	0		0	0	0		0	0	0		Inconclusive
CHEMBL1641712	0	0	1	TRUE	0	0	0		0	0	0		0	0	0		0	0	0		Inconclusive
CHEMBL1641713	1	1	0	FALSE	1	0	0	TRUE	0	0	0		0	0	0		0	0	0		Inconclusive
CHEMBL1641714	0	1	0	TRUE	0	0	0		0	0	0		0	0	0		0	0	0		Inactive
CHEMBL1641715	0	0	1	TRUE	0	0	0		0	0	0		0	0	0		0	0	0		Inconclusive
CHEMBL1641716	0	0	1	TRUE	0	0	0		0	0	0		0	0	0		0	0	0		Inconclusive
CHEMBL1641717	0	0	1	TRUE	0	0	0		0	0	0		0	0	0		0	0	0		Inconclusive
CHEMBL1641718	1	1	0	FALSE	1	0	0	TRUE	0	0	0		0	0	0		0	0	0		Inconclusive
CHEMBL1643194	0	0	0		0	0	1	TRUE	0	0	0		0	0	0		0	0	0		Inconclusive
CHEMBL1643199	0	0	0		1	0	0	TRUE	0	0	0		0	0	0		0	0	0		Inconclusive
CHEMBL1643200	0	0	0		0	0	1	TRUE	0	0	0		0	0	0		0	0	0		Inconclusive
CHEMBL1643201	0	0	0		1	0	0	TRUE	0	0	0		0	0	0		0	0	0		Inconclusive
CHEMBL1643451	0	0	1	TRUE	0	0	0		0	0	0		0	0	0		0	0	0		Inconclusive
CHEMBL1643452	1	0	0	TRUE	0	0	0		0	0	0		0	0	0		0	0	0		Inconclusive
CHEMBL1643453	0	0	1	TRUE	0	0	0		0	0	0		0	0	0		0	0	0		Inconclusive
CHEMBL1643454	1	0	0	TRUE	0	0	0		0	0	0		0	0	0		0	0	0		Inconclusive
CHEMBL1643455	0	0	0		0	0	0		0	1	0	TRUE	0	0	0		0	0	0		Inactive
CHEMBL1643456	0	0	1	TRUE	0	0	0		0	0	0		0	0	0		0	0	0		Inconclusive
CHEMBL1643457	1	0	0	TRUE	0	0	0		0	0	0		0	0	0		0	0	0		Inconclusive
CHEMBL1643680	1	0	0	TRUE	0	0	0		0	0	0		0	0	0		0	0	0		Inconclusive
CHEMBL1643681	1	0	0	TRUE	0	0	0		0	0	0		0	0	0		0	0	0		Inconclusive
CHEMBL1643682	1	0	0	TRUE	0	0	0		0	0	0		0	0	0		0	0	0		Inconclusive
CHEMBL1643683	0	0	1	TRUE	0	0	0		0	0	0		0	0	0		0	0	0		Inconclusive
CHEMBL1644298	1	0	0	TRUE	0	0	0		0	0	0		0	0	0		0	0	0		Inconclusive
CHEMBL1644299	1	0	0	TRUE	1	0	0	TRUE	0	0	0		0	0	0		0	0	0		Active
CHEMBL1644300	1	0	0	TRUE	0	0	0		0	0	0		0	0	0		0	0	0		Inconclusive
CHEMBL1644301	1	0	0	TRUE	1	0	0	TRUE	0	0	0		0	0	0		0	0	0		Active
CHEMBL1644302	1	0	0	TRUE	0	0	0		0	0	0		0	0	0		0	0	0		Inconclusive
CHEMBL1644303	1	0	0	TRUE	0	0	0		0	0	0		0	0	0		0	0	0		Inconclusive
CHEMBL1644304	1	0	0	TRUE	1	0	0	TRUE	0	0	0		0	0	0		0	0	0		Active
CHEMBL1644305	1	0	0	TRUE	1	0	0	TRUE	0	0	0		0	0	0		0	0	0		Active
CHEMBL1644306	1	0	0	TRUE	0	0	0		0	0	0		0	0	0		0	0	0		Inconclusive
CHEMBL1644307	1	0	0	TRUE	0	0	0		0	0	0		0	0	0		0	0	0		Inconclusive
CHEMBL1644308	1	0	0	TRUE	0	0	0		0	0	0		0	0	0		0	0	0		Inconclusive
CHEMBL1644309	1	0	0	TRUE	0	0	0		0	0	0		0	0	0		0	0	0		Inconclusive
CHEMBL1644310	1	0	0	TRUE	1	0	0	TRUE	0	0	0		0	0	0		0	0	0		Active
CHEMBL1644311	1	0	0	TRUE	0	0	0		0	0	0		0	0	0		0	0	0		Inconclusive
CHEMBL1644312	1	0	0	TRUE	0	0	0		0	0	0		0	0	0		0	0	0		Inconclusive
CHEMBL1644313	1	0	0	TRUE	0	0	0		0	0	0		0	0	0		0	0	0		Inconclusive
CHEMBL1644314	1	0	0	TRUE	0	0	0		0	0	0		0	0	0		0	0	0		Inconclusive
CHEMBL1644315	1	0	0	TRUE	0	0	0		0	0	0		0	0	0		0	0	0		Inconclusive
CHEMBL1644614	0	0	0		3	0	0	TRUE	0	0	0		0	0	0		0	0	0		Inconclusive
CHEMBL1651238	0	0	0		3	0	0	TRUE	0	0	0		0	0	0		0	0	0		Inconclusive
CHEMBL1651239	0	0	0		3	0	0	TRUE	0	0	0		0	0	0		0	0	0		Inconclusive
CHEMBL1652297	1	0	0	TRUE	0	0	0		0	0	0		0	0	0		0	0	0		Inconclusive
CHEMBL165484	1	0	0	TRUE	1	0	0	TRUE	0	0	0		0	0	0		0	0	0		Active
CHEMBL165539	1	0	0	TRUE	0	0	1	TRUE	0	0	0		0	0	0		0	0	0		Inconclusive
CHEMBL166408	1	0	0	TRUE	0	0	1	TRUE	0	0	0		0	0	0		0	0	0		Inconclusive
CHEMBL166539	1	0	0	TRUE	1	0	0	TRUE	0	0	0		0	0	0		0	0	0		Active
CHEMBL166572	1	0	0	TRUE	1	0	0	TRUE	0	0	0		0	0	0		0	0	0		Active
CHEMBL166628	1	0	0	TRUE	1	0	0	TRUE	0	0	0		0	0	0		0	0	0		Active
CHEMBL166637	1	0	0	TRUE	1	0	0	TRUE	0	0	0		0	0	0		0	0	0		Active
CHEMBL166687	1	0	0	TRUE	1	0	0	TRUE	0	0	0		0	0	0		0	0	0		Active
CHEMBL167043	1	0	0	TRUE	1	0	0	TRUE	0	0	0		0	0	0		0	0	0		Active
CHEMBL167084	1	0	0	TRUE	0	0	1	TRUE	0	0	0		0	0	0		0	0	0		Inconclusive
CHEMBL1671971	0	0	0		0	0	1	TRUE	0	0	0		1	0	0	TRUE	0	0	0		Inconclusive
CHEMBL167352	1	0	0	TRUE	1	0	0	TRUE	0	0	0		0	0	0		0	0	0		Active
CHEMBL167378	1	0	0	TRUE	1	0	0	TRUE	0	0	0		0	0	0		0	0	0		Active
CHEMBL167430	1	0	0	TRUE	3	0	0	TRUE	0	0	0		0	0	0		0	0	0		Active
CHEMBL167963	1	0	0	TRUE	1	0	0	TRUE	0	0	0		0	0	0		0	0	0		Active
CHEMBL168033	1	0	0	TRUE	1	0	0	TRUE	0	0	0		0	0	0		0	0	0		Active
CHEMBL168166	1	0	0	TRUE	1	0	0	TRUE	0	0	0		0	0	0		0	0	0		Active
CHEMBL1688383	0	0	0		0	0	0		0	1	0	TRUE	0	0	0		0	0	0		Inactive
CHEMBL1688452	0	0	1	TRUE	0	0	0		0	1	0	TRUE	0	0	0		0	0	0		Inconclusive
CHEMBL1688453	0	0	0		0	0	0		0	2	0	TRUE	0	0	0		0	0	0		Inactive
CHEMBL1688454	1	0	0	TRUE	0	0	0		0	1	0	TRUE	0	0	0		0	0	0		Inconclusive
CHEMBL1688455	0	0	0		0	0	0		0	1	0	TRUE	0	0	0		0	0	0		Inactive
CHEMBL1688457	1	0	0	TRUE	0	0	0		0	1	0	TRUE	0	0	0		0	0	0		Inconclusive
CHEMBL1688458	1	0	0	TRUE	0	0	0		0	1	0	TRUE	0	0	0		0	0	0		Inconclusive
CHEMBL1688463	1	0	0	TRUE	0	0	0		0	1	0	TRUE	0	0	0		0	0	0		Inconclusive
CHEMBL1688465	1	0	0	TRUE	0	0	0		0	1	0	TRUE	0	0	0		0	0	0		Inconclusive
CHEMBL1688482	1	0	0	TRUE	0	0	0		0	1	0	TRUE	0	0	0		0	0	0		Inconclusive
CHEMBL16901	0	0	0		0	0	0		0	1	0	TRUE	0	0	0		0	0	0		Inactive
CHEMBL171447	0	0	0		0	0	0		0	1	0	TRUE	0	0	0		0	0	0		Inactive
CHEMBL172490	0	0	0		1	0	0	TRUE	0	0	0		1	0	0	TRUE	0	0	0		Inconclusive
CHEMBL172492	0	0	0		1	0	0	TRUE	0	0	0		1	0	0	TRUE	0	0	0		Inconclusive
CHEMBL172793	0	0	0		1	0	0	TRUE	0	0	0		0	0	0		0	0	0		Inconclusive
CHEMBL1729254	1	0	0	TRUE	1	0	0	TRUE	0	0	0		0	0	0		0	0	0		Active
CHEMBL172931	0	0	0		1	0	0	TRUE	0	0	0		1	0	0	TRUE	0	0	0		Inconclusive
CHEMBL172959	0	0	0		1	0	0	TRUE	0	0	0		1	0	0	TRUE	0	0	0		Inconclusive
CHEMBL173159	0	0	0		2	0	0	TRUE	0	0	0		2	0	0	TRUE	0	0	0		Inconclusive
CHEMBL173236	1	0	0	TRUE	0	0	0		0	0	0		1	0	0	TRUE	0	0	0		Active
CHEMBL173285	0	0	0		1	0	0	TRUE	0	0	0		1	0	0	TRUE	0	0	0		Inconclusive
CHEMBL173386	0	0	0		1	0	0	TRUE	0	0	0		1	0	0	TRUE	0	0	0		Inconclusive
CHEMBL173409	0	0	0		1	0	0	TRUE	0	0	0		1	0	0	TRUE	0	0	0		Inconclusive
CHEMBL173494	0	0	0		1	0	0	TRUE	0	0	0		1	0	0	TRUE	0	0	0		Inconclusive
CHEMBL1735595	0	0	0		0	0	0		0	1	0	TRUE	0	0	0		0	0	0		Inactive
CHEMBL1736067	0	0	1	TRUE	0	0	0		0	0	0		0	0	0		0	0	0		Inconclusive
CHEMBL173828	0	0	0		1	0	0	TRUE	0	0	0		1	0	0	TRUE	0	0	0		Inconclusive
CHEMBL174167	0	0	0		1	0	0	TRUE	0	0	0		0	0	0		0	0	0		Inconclusive
CHEMBL174596	0	0	0		1	0	0	TRUE	0	0	0		0	0	0		0	0	0		Inconclusive
CHEMBL174639	0	0	0		1	0	0	TRUE	0	0	0		0	0	0		0	0	0		Inconclusive
CHEMBL174644	0	0	0		1	0	0	TRUE	0	0	0		0	0	0		0	0	0		Inconclusive
CHEMBL174764	0	0	0		1	0	0	TRUE	0	0	0		1	0	0	TRUE	0	0	0		Inconclusive
CHEMBL174798	0	0	0		1	0	0	TRUE	0	0	0		0	0	0		0	0	0		Inconclusive
CHEMBL174906	0	0	0		1	0	0	TRUE	0	0	0		0	0	0		0	0	0		Inconclusive
CHEMBL174999	0	0	0		1	0	0	TRUE	0	0	0		0	0	0		0	0	0		Inconclusive
CHEMBL175310	0	0	0		1	0	0	TRUE	0	0	0		1	0	0	TRUE	0	0	0		Inconclusive
CHEMBL175332	0	0	0		1	0	0	TRUE	0	0	0		1	0	0	TRUE	0	0	0		Inconclusive
CHEMBL175490	0	0	0		1	0	0	TRUE	0	0	0		0	0	0		0	0	0		Inconclusive
CHEMBL175589	0	0	0		1	0	0	TRUE	0	0	0		0	0	0		0	0	0		Inconclusive
CHEMBL175637	0	0	0		1	0	0	TRUE	0	0	0		0	0	0		0	0	0		Inconclusive
CHEMBL175802	0	0	0		1	0	0	TRUE	0	0	0		0	0	0		0	0	0		Inconclusive
CHEMBL176035	0	0	0		1	0	0	TRUE	0	0	0		0	0	0		0	0	0		Inconclusive
CHEMBL1760553	0	0	0		1	0	0	TRUE	0	0	0		0	0	0		0	0	0		Inconclusive
CHEMBL1760554	1	0	0	TRUE	1	0	0	TRUE	0	0	0		0	0	0		0	0	0		Active
CHEMBL1760555	1	0	0	TRUE	0	0	1	TRUE	0	0	0		0	0	0		0	0	0		Inconclusive
CHEMBL1760556	1	0	0	TRUE	1	0	0	TRUE	0	0	0		0	0	0		0	0	0		Active
CHEMBL1760557	1	0	0	TRUE	1	0	0	TRUE	0	0	0		0	0	0		0	0	0		Active
CHEMBL1760558	1	0	0	TRUE	1	0	0	TRUE	0	0	0		0	0	0		0	0	0		Active
CHEMBL1760559	1	0	0	TRUE	1	0	0	TRUE	0	0	0		0	0	0		0	0	0		Active
CHEMBL1760560	1	0	0	TRUE	1	0	0	TRUE	0	0	0		0	0	0		0	0	0		Active
CHEMBL1760561	1	0	0	TRUE	1	0	0	TRUE	0	0	0		0	0	0		0	0	0		Active
CHEMBL176075	0	0	0		1	0	0	TRUE	0	0	0		1	0	0	TRUE	0	0	0		Inconclusive
CHEMBL176222	0	0	0		1	0	0	TRUE	0	0	0		1	0	0	TRUE	0	0	0		Inconclusive
CHEMBL176251	0	0	0		1	0	0	TRUE	0	0	0		0	0	0		0	0	0		Inconclusive
CHEMBL176592	0	0	0		1	0	0	TRUE	0	0	0		0	0	0		0	0	0		Inconclusive
CHEMBL176770	0	0	0		1	0	0	TRUE	0	0	0		0	0	0		0	0	0		Inconclusive
CHEMBL1773167	1	0	0	TRUE	0	0	0		0	1	0	TRUE	0	0	0		0	0	0		Inconclusive
CHEMBL1773246	0	0	0		0	0	0		0	2	0	TRUE	0	0	0		0	0	0		Inactive
CHEMBL1773247	0	0	0		0	0	0		0	2	0	TRUE	0	0	0		0	0	0		Inactive
CHEMBL1773248	0	0	0		0	0	0		0	1	0	TRUE	0	0	0		0	0	0		Inactive
CHEMBL1773249	0	0	0		0	0	0		0	1	0	TRUE	0	0	0		0	0	0		Inactive
CHEMBL1773250	1	0	0	TRUE	0	0	0		0	1	0	TRUE	0	0	0		0	0	0		Inconclusive
CHEMBL1773251	0	0	0		0	0	0		0	2	0	TRUE	0	0	0		0	0	0		Inactive
CHEMBL1773252	0	0	0		0	0	0		0	1	0	TRUE	0	0	0		0	0	0		Inactive
CHEMBL1773253	0	0	0		0	0	0		0	1	0	TRUE	0	0	0		0	0	0		Inactive
CHEMBL1773254	1	0	0	TRUE	0	0	0		0	1	0	TRUE	0	0	0		0	0	0		Inconclusive
CHEMBL1773255	0	0	0		0	0	0		0	1	0	TRUE	0	0	0		0	0	0		Inactive
CHEMBL1773256	0	0	0		0	0	0		0	1	0	TRUE	0	0	0		0	0	0		Inactive
CHEMBL1773257	0	0	0		0	0	0		0	1	0	TRUE	0	0	0		0	0	0		Inactive
CHEMBL1773258	1	0	0	TRUE	0	0	0		0	1	0	TRUE	0	0	0		0	0	0		Inconclusive
CHEMBL1773259	1	0	0	TRUE	0	0	0		0	1	0	TRUE	0	0	0		0	0	0		Inconclusive
CHEMBL1773260	1	0	0	TRUE	0	0	0		0	1	0	TRUE	0	0	0		0	0	0		Inconclusive
CHEMBL1773261	1	0	0	TRUE	0	0	0		0	1	0	TRUE	0	0	0		0	0	0		Inconclusive
CHEMBL177395	0	0	0		1	0	0	TRUE	0	0	0		0	0	0		0	0	0		Inconclusive
CHEMBL177439	0	0	0		1	0	0	TRUE	0	0	0		0	0	0		0	0	0		Inconclusive
CHEMBL177454	0	0	0		1	0	0	TRUE	0	0	0		0	0	0		0	0	0		Inconclusive
CHEMBL177552	0	0	0		1	0	0	TRUE	0	0	0		0	0	0		0	0	0		Inconclusive
CHEMBL177717	0	0	0		1	0	0	TRUE	0	0	0		0	0	0		0	0	0		Inconclusive
CHEMBL177755	0	0	0		1	0	0	TRUE	0	0	0		0	0	0		0	0	0		Inconclusive
CHEMBL1777824	0	0	0		0	0	1	TRUE	0	0	0		0	0	0		0	0	0		Inconclusive
CHEMBL177830	0	0	0		1	0	0	TRUE	0	0	0		0	0	0		0	0	0		Inconclusive
CHEMBL177831	0	0	0		1	0	0	TRUE	0	0	0		1	0	0	TRUE	0	0	0		Inconclusive
CHEMBL177854	0	0	0		1	0	0	TRUE	0	0	0		0	0	0		0	0	0		Inconclusive
CHEMBL177871	0	0	0		1	0	0	TRUE	0	0	0		0	0	0		0	0	0		Inconclusive
CHEMBL1778732	0	0	0		0	0	1	TRUE	0	0	0		0	0	0		0	0	0		Inconclusive
CHEMBL1778733	0	0	0		0	0	1	TRUE	0	0	0		0	0	0		0	0	0		Inconclusive
CHEMBL177877	0	0	0		1	0	0	TRUE	0	0	0		0	0	0		0	0	0		Inconclusive
CHEMBL1778829	0	0	0		0	0	1	TRUE	0	0	0		0	0	0		0	0	0		Inconclusive
CHEMBL1778830	0	0	0		0	0	1	TRUE	0	0	0		0	0	0		0	0	0		Inconclusive
CHEMBL1778831	0	0	0		0	0	1	TRUE	0	0	0		0	0	0		0	0	0		Inconclusive
CHEMBL1778832	0	0	0		1	0	0	TRUE	0	0	0		0	0	0		0	0	0		Inconclusive
CHEMBL1778833	0	0	0		1	0	0	TRUE	0	0	0		0	0	0		0	0	0		Inconclusive
CHEMBL1778834	0	0	0		1	0	0	TRUE	0	0	0		0	0	0		0	0	0		Inconclusive
CHEMBL1778835	0	0	0		1	0	0	TRUE	0	0	0		0	0	0		0	0	0		Inconclusive
CHEMBL1778836	0	0	0		1	0	0	TRUE	0	0	0		0	0	0		0	0	0		Inconclusive
CHEMBL1778837	0	0	0		0	0	1	TRUE	0	0	0		0	0	0		0	0	0		Inconclusive
CHEMBL1778838	0	0	0		1	0	0	TRUE	0	0	0		0	0	0		0	0	0		Inconclusive
CHEMBL1778839	0	0	0		1	0	0	TRUE	0	0	0		0	0	0		0	0	0		Inconclusive
CHEMBL1778840	0	0	0		1	0	0	TRUE	0	0	0		0	0	0		0	0	0		Inconclusive
CHEMBL1779473	0	0	0		1	0	0	TRUE	0	0	0		0	0	0		0	0	0		Inconclusive
CHEMBL1779474	0	0	0		1	0	0	TRUE	0	0	0		0	0	0		0	0	0		Inconclusive
CHEMBL1779475	0	0	0		1	0	0	TRUE	0	0	0		0	0	0		0	0	0		Inconclusive
CHEMBL1779476	0	0	0		1	0	0	TRUE	0	0	0		0	0	0		0	0	0		Inconclusive
CHEMBL1779477	0	0	0		1	0	0	TRUE	0	0	0		0	0	0		0	0	0		Inconclusive
CHEMBL1779478	0	0	0		1	0	0	TRUE	0	0	0		0	0	0		0	0	0		Inconclusive
CHEMBL1779479	0	0	0		1	0	0	TRUE	0	0	0		0	0	0		0	0	0		Inconclusive
CHEMBL1779480	0	0	0		1	0	0	TRUE	0	0	0		0	0	0		0	0	0		Inconclusive
CHEMBL1779481	0	0	0		1	0	0	TRUE	0	0	0		0	0	0		0	0	0		Inconclusive
CHEMBL1779482	0	0	0		1	0	0	TRUE	0	0	0		0	0	0		0	0	0		Inconclusive
CHEMBL177974	0	0	0		1	0	0	TRUE	0	0	0		0	0	0		0	0	0		Inconclusive
CHEMBL17805	0	0	0		1	0	0	TRUE	0	0	0		3	0	0	TRUE	0	0	0		Inconclusive
CHEMBL178064	0	0	0		1	0	0	TRUE	0	0	0		0	0	0		0	0	0		Inconclusive
CHEMBL178105	0	0	0		0	0	0		1	0	0	TRUE	0	0	0		0	0	0		Inconclusive
CHEMBL178235	1	0	0	TRUE	0	0	0		0	0	0		0	0	0		0	0	0		Inconclusive
CHEMBL178236	1	0	0	TRUE	1	0	0	TRUE	0	0	0		1	0	0	TRUE	0	0	0		Active
CHEMBL178244	1	0	0	TRUE	0	0	0		0	0	0		0	0	0		0	0	0		Inconclusive
CHEMBL178245	1	0	0	TRUE	1	0	0	TRUE	0	0	0		1	0	0	TRUE	0	0	0		Active
CHEMBL178296	1	0	0	TRUE	1	0	0	TRUE	0	0	0		0	0	0		0	0	0		Active
CHEMBL1783068	0	0	0		1	0	0	TRUE	0	0	0		0	0	0		0	0	0		Inconclusive
CHEMBL1783070	0	0	0		1	0	0	TRUE	0	0	0		0	0	0		0	0	0		Inconclusive
CHEMBL178309	0	0	0		1	0	0	TRUE	0	0	0		1	0	0	TRUE	0	0	0		Inconclusive
CHEMBL1783777	0	0	0		0	0	0		0	1	0	TRUE	0	0	0		0	0	0		Inactive
CHEMBL178380	1	0	0	TRUE	1	0	0	TRUE	0	0	0		0	0	0		0	0	0		Active
CHEMBL1784944	1	0	0	TRUE	0	0	0		0	0	0		0	0	0		0	0	0		Inconclusive
CHEMBL1784945	1	0	0	TRUE	0	0	0		0	0	0		0	0	0		0	0	0		Inconclusive
CHEMBL1784948	1	0	0	TRUE	0	0	0		0	0	0		0	0	0		0	0	0		Inconclusive
CHEMBL1784949	1	0	0	TRUE	0	0	0		0	0	0		0	0	0		0	0	0		Inconclusive
CHEMBL1784954	1	0	0	TRUE	0	0	0		0	0	0		0	0	0		0	0	0		Inconclusive
CHEMBL1785046	1	0	0	TRUE	0	0	0		0	2	0	TRUE	0	0	0		0	0	0		Inconclusive
CHEMBL1785047	0	0	0		0	0	0		0	2	0	TRUE	0	0	0		0	0	0		Inactive
CHEMBL178513	0	0	0		0	0	0		0	1	0	TRUE	0	0	1	TRUE	0	0	0		Inactive
CHEMBL178536	0	0	0		1	0	0	TRUE	0	0	0		0	0	0		0	0	0		Inconclusive
CHEMBL178630	0	0	0		0	0	0		0	1	0	TRUE	0	0	1	TRUE	0	0	0		Inactive
CHEMBL178659	0	0	0		1	0	0	TRUE	0	0	0		1	0	0	TRUE	0	0	0		Inconclusive
CHEMBL178728	0	0	0		0	0	0		1	0	0	TRUE	0	0	0		0	0	0		Inconclusive
CHEMBL178744	0	0	0		1	0	0	TRUE	0	0	0		0	0	0		0	0	0		Inconclusive
CHEMBL178909	0	0	0		1	0	0	TRUE	0	0	0		1	0	0	TRUE	0	0	0		Inconclusive
CHEMBL179180	0	0	0		1	0	0	TRUE	0	0	0		1	0	0	TRUE	0	0	0		Inconclusive
CHEMBL179330	4	0	0	TRUE	4	0	0	TRUE	0	0	0		3	0	0	TRUE	0	0	0		Active
CHEMBL179452	0	0	0		1	0	0	TRUE	0	0	0		1	0	0	TRUE	0	0	0		Inconclusive
CHEMBL179542	1	0	0	TRUE	1	0	0	TRUE	0	0	0		1	0	0	TRUE	0	0	0		Active
CHEMBL179604	1	0	0	TRUE	1	0	0	TRUE	0	0	0		1	0	0	TRUE	0	0	0		Active
CHEMBL179622	0	0	0		1	0	0	TRUE	0	0	0		1	0	0	TRUE	0	0	0		Inconclusive
CHEMBL179657	0	0	0		0	0	1	TRUE	0	0	0		0	0	1	TRUE	0	0	0		Inconclusive
CHEMBL179733	0	0	0		1	0	0	TRUE	0	0	0		0	0	0		0	0	0		Inconclusive
CHEMBL179789	1	0	0	TRUE	0	0	0		0	0	0		0	0	0		0	0	0		Inconclusive
CHEMBL179853	0	0	1	TRUE	0	0	0		0	0	0		0	0	0		0	0	0		Inconclusive
CHEMBL180019	0	0	0		1	0	0	TRUE	0	0	0		1	0	0	TRUE	0	0	0		Inconclusive
CHEMBL180078	0	0	1	TRUE	0	0	0		0	0	0		0	0	0		0	0	0		Inconclusive
CHEMBL180083	1	0	0	TRUE	0	0	0		0	0	0		0	0	0		0	0	0		Inconclusive
CHEMBL1801440	0	0	0		2	0	0	TRUE	0	0	0		0	0	0		0	0	0		Inconclusive
CHEMBL1801712	1	0	0	TRUE	1	0	0	TRUE	0	0	0		0	0	0		0	0	0		Active
CHEMBL1801713	1	0	0	TRUE	1	0	0	TRUE	0	0	0		0	0	0		0	0	0		Active
CHEMBL1801714	1	0	0	TRUE	1	0	0	TRUE	0	0	0		0	0	0		0	0	0		Active
CHEMBL1801734	1	0	0	TRUE	1	0	0	TRUE	0	0	0		0	0	0		0	0	0		Active
CHEMBL1801735	1	0	0	TRUE	1	0	0	TRUE	0	0	0		0	0	0		0	0	0		Active
CHEMBL1801736	1	0	0	TRUE	1	0	0	TRUE	0	0	0		0	0	0		0	0	0		Active
CHEMBL1801737	1	0	0	TRUE	1	0	0	TRUE	0	0	0		0	0	0		0	0	0		Active
CHEMBL1801738	1	0	0	TRUE	1	0	0	TRUE	0	0	0		0	0	0		0	0	0		Active
CHEMBL1801739	1	0	0	TRUE	1	0	0	TRUE	0	0	0		0	0	0		0	0	0		Active
CHEMBL1801740	2	0	0	TRUE	2	0	0	TRUE	0	0	0		0	0	0		0	0	0		Active
CHEMBL1801741	1	0	0	TRUE	1	0	0	TRUE	0	0	0		0	0	0		0	0	0		Active
CHEMBL1801742	1	0	0	TRUE	1	0	0	TRUE	0	0	0		0	0	0		0	0	0		Active
CHEMBL1801743	1	0	0	TRUE	1	0	0	TRUE	0	0	0		0	0	0		0	0	0		Active
CHEMBL1801744	1	0	0	TRUE	1	0	0	TRUE	0	0	0		0	0	0		0	0	0		Active
CHEMBL180189	0	0	0		0	0	0		1	0	0	TRUE	0	0	0		0	0	0		Inconclusive
CHEMBL180311	1	0	0	TRUE	0	0	0		0	0	0		0	0	0		0	0	0		Inconclusive
CHEMBL180338	1	0	0	TRUE	0	0	0		0	0	0		0	0	0		0	0	0		Inconclusive
CHEMBL180395	1	0	0	TRUE	0	0	0		0	0	0		0	0	0		0	0	0		Inconclusive
CHEMBL180400	0	0	1	TRUE	0	0	0		0	0	0		0	0	0		0	0	0		Inconclusive
CHEMBL180430	1	0	2	FALSE	0	0	0		0	0	0		0	0	0		0	0	0		Inconclusive
CHEMBL180504	1	0	0	TRUE	1	0	0	TRUE	0	0	0		1	0	0	TRUE	0	0	0		Active
CHEMBL180558	0	0	0		0	0	0		1	0	0	TRUE	0	0	0		0	0	0		Inconclusive
CHEMBL180611	0	0	0		0	0	0		1	0	0	TRUE	0	0	0		0	0	0		Inconclusive
CHEMBL180633	3	0	0	TRUE	0	0	0		0	0	0		0	0	0		0	0	0		Inconclusive
CHEMBL180691	0	0	0		0	0	0		1	0	0	TRUE	0	0	0		0	0	0		Inconclusive
CHEMBL180696	1	0	0	TRUE	0	0	0		0	0	0		0	0	0		0	0	0		Inconclusive
CHEMBL180820	1	0	0	TRUE	0	0	0		0	0	0		0	0	0		0	0	0		Inconclusive
CHEMBL180827	0	0	0		0	0	0		1	0	0	TRUE	0	0	0		0	0	0		Inconclusive
CHEMBL180898	0	0	1	TRUE	0	0	0		0	0	0		0	0	0		0	0	0		Inconclusive
CHEMBL180912	0	0	0		1	0	0	TRUE	0	0	0		1	0	0	TRUE	0	0	0		Inconclusive
CHEMBL180928	0	0	0		0	0	0		0	1	0	TRUE	1	0	0	TRUE	0	0	0		Inactive
CHEMBL181087	1	0	0	TRUE	1	0	0	TRUE	0	0	0		1	0	0	TRUE	0	0	0		Active
CHEMBL181141	1	0	0	TRUE	1	0	0	TRUE	0	0	0		1	0	0	TRUE	0	0	0		Active
CHEMBL181159	0	0	0		0	0	0		1	0	0	TRUE	0	0	0		0	0	0		Inconclusive
CHEMBL181175	1	0	0	TRUE	0	0	0		0	0	0		0	0	0		0	0	0		Inconclusive
CHEMBL181198	1	0	0	TRUE	0	0	0		0	0	0		0	0	0		0	0	0		Inconclusive
CHEMBL181219	1	0	0	TRUE	1	0	0	TRUE	0	0	0		1	0	0	TRUE	0	0	0		Active
CHEMBL181264	0	0	0		0	0	0		1	0	0	TRUE	0	0	0		0	0	0		Inconclusive
CHEMBL1813003	1	0	0	TRUE	0	0	0		0	0	0		0	0	0		0	0	0		Inconclusive
CHEMBL1813004	1	0	0	TRUE	1	0	0	TRUE	0	0	0		0	0	0		0	0	0		Active
CHEMBL1813005	1	0	0	TRUE	0	0	0		0	0	0		0	0	0		0	0	0		Inconclusive
CHEMBL1813006	1	0	0	TRUE	0	0	0		0	0	0		0	0	0		0	0	0		Inconclusive
CHEMBL1813007	1	0	0	TRUE	1	0	0	TRUE	0	0	0		0	0	0		0	0	0		Active
CHEMBL1813008	1	0	0	TRUE	1	0	0	TRUE	0	0	0		0	0	0		0	0	0		Active
CHEMBL1813009	1	0	0	TRUE	1	0	0	TRUE	0	0	0		0	0	0		0	0	0		Active
CHEMBL1813010	1	0	0	TRUE	0	0	0		0	0	0		0	0	0		0	0	0		Inconclusive
CHEMBL1813011	1	0	0	TRUE	1	0	0	TRUE	0	0	0		0	0	0		0	0	0		Active
CHEMBL1813012	0	0	0		1	0	0	TRUE	0	0	0		0	0	0		0	0	0		Inconclusive
CHEMBL1813187	0	0	1	TRUE	0	0	0		0	0	0		0	0	0		0	0	0		Inconclusive
CHEMBL1813188	0	0	1	TRUE	0	0	0		0	0	0		0	0	0		0	0	0		Inconclusive
CHEMBL1813189	0	0	1	TRUE	0	0	0		0	0	0		0	0	0		0	0	0		Inconclusive
CHEMBL1813190	0	0	1	TRUE	0	0	0		0	0	0		0	0	0		0	0	0		Inconclusive
CHEMBL1813191	0	0	1	TRUE	0	0	0		0	0	0		0	0	0		0	0	0		Inconclusive
CHEMBL1813192	1	0	0	TRUE	0	0	1	TRUE	0	0	0		0	0	0		0	0	0		Inconclusive
CHEMBL1813193	0	0	1	TRUE	0	0	0		0	0	0		0	0	0		0	0	0		Inconclusive
CHEMBL1813194	1	0	0	TRUE	0	0	1	TRUE	0	0	0		0	0	0		0	0	0		Inconclusive
CHEMBL1813195	1	0	0	TRUE	0	0	1	TRUE	0	0	0		0	0	0		0	0	0		Inconclusive
CHEMBL1813196	1	0	0	TRUE	1	0	0	TRUE	0	0	0		0	0	0		0	0	0		Active
CHEMBL1813197	1	0	0	TRUE	1	0	0	TRUE	0	0	0		0	0	0		0	0	0		Active
CHEMBL1813198	1	0	0	TRUE	1	0	0	TRUE	0	0	0		0	0	0		0	0	0		Active
CHEMBL1813199	1	0	0	TRUE	1	0	0	TRUE	0	0	0		0	0	0		0	0	0		Active
CHEMBL1813200	1	0	0	TRUE	1	0	0	TRUE	0	0	0		0	0	0		0	0	0		Active
CHEMBL1813201	1	0	0	TRUE	0	0	1	TRUE	0	0	0		0	0	0		0	0	0		Inconclusive
CHEMBL1813202	1	0	0	TRUE	1	0	0	TRUE	0	0	0		0	0	0		0	0	0		Active
CHEMBL1813203	1	0	0	TRUE	1	0	0	TRUE	0	0	0		0	0	0		0	0	0		Active
CHEMBL1813204	1	0	0	TRUE	1	0	0	TRUE	0	0	0		0	0	0		0	0	0		Active
CHEMBL1813205	0	0	1	TRUE	0	0	0		0	0	0		0	0	0		0	0	0		Inconclusive
CHEMBL181554	1	0	0	TRUE	1	0	0	TRUE	0	0	0		1	0	0	TRUE	0	0	0		Active
CHEMBL181628	1	0	0	TRUE	1	0	0	TRUE	0	0	0		1	0	0	TRUE	0	0	0		Active
CHEMBL181644	1	0	0	TRUE	1	0	0	TRUE	0	0	0		1	0	0	TRUE	0	0	0		Active
CHEMBL181656	1	0	0	TRUE	1	0	0	TRUE	0	0	0		1	0	0	TRUE	0	0	0		Active
CHEMBL1817687	1	0	0	TRUE	1	0	0	TRUE	0	0	0		0	0	0		0	0	0		Active
CHEMBL181937	1	0	0	TRUE	1	0	0	TRUE	0	0	0		1	0	0	TRUE	0	0	0		Active
CHEMBL1819390	1	0	0	TRUE	1	0	0	TRUE	0	0	0		0	0	0		0	0	0		Active
CHEMBL1819391	1	0	0	TRUE	1	0	0	TRUE	0	0	0		0	0	0		0	0	0		Active
CHEMBL1819392	1	0	0	TRUE	1	0	0	TRUE	0	0	0		0	0	0		0	0	0		Active
CHEMBL1819393	1	0	0	TRUE	1	0	0	TRUE	0	0	0		0	0	0		0	0	0		Active
CHEMBL1819394	1	0	0	TRUE	1	0	0	TRUE	0	0	0		0	0	0		0	0	0		Active
CHEMBL1819395	0	0	0		0	0	0		0	1	0	TRUE	0	0	0		0	0	0		Inactive
CHEMBL1819396	1	0	0	TRUE	0	0	1	TRUE	0	0	0		0	0	0		0	0	0		Inconclusive
CHEMBL1819397	1	0	0	TRUE	1	0	0	TRUE	0	0	0		0	0	0		0	0	0		Active
CHEMBL1819398	1	0	0	TRUE	0	0	0		0	0	0		0	0	0		0	0	0		Inconclusive
CHEMBL1819478	1	0	0	TRUE	1	0	0	TRUE	0	0	0		0	0	0		0	0	0		Active
CHEMBL1819479	2	0	0	TRUE	0	0	0		0	0	0		0	0	0		0	0	0		Inconclusive
CHEMBL1819480	1	0	0	TRUE	0	0	0		0	0	0		0	0	0		0	0	0		Inconclusive
CHEMBL1819481	1	0	0	TRUE	1	0	0	TRUE	0	0	0		0	0	0		0	0	0		Active
CHEMBL1819482	1	0	0	TRUE	1	0	0	TRUE	0	0	0		0	0	0		0	0	0		Active
CHEMBL1819483	1	0	0	TRUE	1	0	0	TRUE	0	0	0		0	0	0		0	0	0		Active
CHEMBL181954	1	0	0	TRUE	2	0	0	TRUE	0	0	0		1	0	0	TRUE	0	0	0		Active
CHEMBL182100	2	0	0	TRUE	2	0	0	TRUE	0	0	0		1	0	0	TRUE	0	0	0		Active
CHEMBL1821831	1	0	0	TRUE	1	0	0	TRUE	0	0	0		0	0	0		0	0	0		Active
CHEMBL1821832	1	0	0	TRUE	1	0	0	TRUE	0	0	0		0	0	0		0	0	0		Active
CHEMBL1821833	1	0	0	TRUE	1	0	0	TRUE	0	0	0		0	0	0		0	0	0		Active
CHEMBL1821834	1	0	0	TRUE	1	0	0	TRUE	0	0	0		0	0	0		0	0	0		Active
CHEMBL1821835	1	0	0	TRUE	1	0	0	TRUE	0	0	0		0	0	0		0	0	0		Active
CHEMBL1821836	1	0	0	TRUE	1	0	0	TRUE	0	0	0		0	0	0		0	0	0		Active
CHEMBL1821837	1	0	0	TRUE	1	0	0	TRUE	0	0	0		0	0	0		0	0	0		Active
CHEMBL182200	0	0	0		1	0	0	TRUE	0	0	0		1	0	0	TRUE	0	0	0		Inconclusive
CHEMBL182230	1	0	0	TRUE	1	0	0	TRUE	0	0	0		1	0	0	TRUE	0	0	0		Active
CHEMBL1825104	1	0	0	TRUE	1	0	0	TRUE	0	0	0		0	0	0		0	0	0		Active
CHEMBL1825105	1	0	0	TRUE	1	0	0	TRUE	0	0	0		0	0	0		0	0	0		Active
CHEMBL1825106	1	0	0	TRUE	1	0	0	TRUE	0	0	0		0	0	0		0	0	0		Active
CHEMBL1825107	1	0	0	TRUE	1	0	0	TRUE	0	0	0		0	0	0		0	0	0		Active
CHEMBL1825108	1	0	0	TRUE	1	0	0	TRUE	0	0	0		0	0	0		0	0	0		Active
CHEMBL1825109	1	0	0	TRUE	1	0	0	TRUE	0	0	0		0	0	0		0	0	0		Active
CHEMBL1825110	1	0	0	TRUE	1	0	0	TRUE	0	0	0		0	0	0		0	0	0		Active
CHEMBL1825111	1	0	0	TRUE	1	0	0	TRUE	0	0	0		0	0	0		0	0	0		Active
CHEMBL1825112	1	0	0	TRUE	1	0	0	TRUE	0	0	0		0	0	0		0	0	0		Active
CHEMBL1825113	1	0	0	TRUE	1	0	0	TRUE	0	0	0		0	0	0		0	0	0		Active
CHEMBL1825114	1	0	0	TRUE	1	0	0	TRUE	0	0	0		0	0	0		0	0	0		Active
CHEMBL1825115	1	0	0	TRUE	1	0	0	TRUE	0	0	0		0	0	0		0	0	0		Active
CHEMBL1825116	1	0	0	TRUE	1	0	0	TRUE	0	0	0		0	0	0		0	0	0		Active
CHEMBL1825117	1	0	0	TRUE	1	0	0	TRUE	0	0	0		0	0	0		0	0	0		Active
CHEMBL1825118	1	0	0	TRUE	1	0	0	TRUE	0	0	0		0	0	0		0	0	0		Active
CHEMBL1825119	1	0	0	TRUE	1	0	0	TRUE	0	0	0		0	0	0		0	0	0		Active
CHEMBL1825120	1	0	0	TRUE	1	0	0	TRUE	0	0	0		0	0	0		0	0	0		Active
CHEMBL1825121	1	0	0	TRUE	1	0	0	TRUE	0	0	0		0	0	0		0	0	0		Active
CHEMBL1825122	1	0	0	TRUE	1	0	0	TRUE	0	0	0		0	0	0		0	0	0		Active
CHEMBL1825123	1	0	0	TRUE	1	0	0	TRUE	0	0	0		0	0	0		0	0	0		Active
CHEMBL1825124	1	0	0	TRUE	1	0	0	TRUE	0	0	0		0	0	0		0	0	0		Active
CHEMBL1825125	1	0	0	TRUE	1	0	0	TRUE	0	0	0		0	0	0		0	0	0		Active
CHEMBL1825126	1	0	0	TRUE	1	0	0	TRUE	0	0	0		0	0	0		0	0	0		Active
CHEMBL1825127	1	0	0	TRUE	1	0	0	TRUE	0	0	0		0	0	0		0	0	0		Active
CHEMBL1825128	1	0	0	TRUE	1	0	0	TRUE	0	0	0		0	0	0		0	0	0		Active
CHEMBL1825129	1	0	0	TRUE	1	0	0	TRUE	0	0	0		0	0	0		0	0	0		Active
CHEMBL182583	3	0	0	TRUE	0	0	0		0	0	0		0	0	0		0	0	0		Inconclusive
CHEMBL182653	2	0	0	TRUE	0	0	0		0	0	0		0	0	0		0	0	0		Inconclusive
CHEMBL1828826	1	0	0	TRUE	0	0	0		0	0	0		0	0	0		0	0	0		Inconclusive
CHEMBL182884	1	0	0	TRUE	1	0	0	TRUE	0	0	0		1	0	0	TRUE	0	0	0		Active
CHEMBL1829173	0	0	0		0	0	0		0	1	0	TRUE	0	0	0		0	0	0		Inactive
CHEMBL182941	3	0	0	TRUE	0	0	0		0	0	0		0	0	0		0	0	0		Inconclusive
CHEMBL183191	2	0	1	FALSE	0	0	0		0	0	0		0	0	0		0	0	0		Inconclusive
CHEMBL183213	2	0	1	FALSE	0	0	0		0	0	0		0	0	0		0	0	0		Inconclusive
CHEMBL1833984	0	0	0		0	0	0		1	0	0	TRUE	0	0	0		0	0	0		Inconclusive
CHEMBL1834951	0	0	0		0	0	0		1	0	0	TRUE	0	0	0		0	0	0		Inconclusive
CHEMBL1834952	0	0	0		0	0	0		1	0	0	TRUE	0	0	0		0	0	0		Inconclusive
CHEMBL183502	3	0	0	TRUE	0	0	0		0	0	0		0	0	0		0	0	0		Inconclusive
CHEMBL183667	2	0	1	FALSE	0	0	0		0	0	0		0	0	0		0	0	0		Inconclusive
CHEMBL1836927	0	0	0		0	0	0		1	0	0	TRUE	0	0	0		0	0	0		Inconclusive
CHEMBL1836976	0	0	0		0	0	0		1	0	0	TRUE	0	0	0		0	0	0		Inconclusive
CHEMBL183909	1	0	2	FALSE	0	0	0		0	0	0		0	0	0		0	0	0		Inconclusive
CHEMBL186179	6	0	0	TRUE	8	0	0	TRUE	0	0	0		4	0	0	TRUE	0	0	0		Active
CHEMBL1871064	0	0	1	TRUE	0	0	0		0	0	0		0	0	0		0	0	0		Inconclusive
CHEMBL187557	1	0	0	TRUE	1	0	0	TRUE	0	0	0		1	0	0	TRUE	0	0	0		Active
CHEMBL187734	0	0	0		0	0	0		1	0	0	TRUE	0	0	0		0	0	0		Inconclusive
CHEMBL18797	3	0	0	TRUE	1	0	0	TRUE	0	0	0		0	0	0		0	0	0		Active
CHEMBL188751	1	0	0	TRUE	1	0	0	TRUE	0	0	0		1	0	0	TRUE	0	0	0		Active
CHEMBL189066	1	0	0	TRUE	1	0	0	TRUE	0	0	0		1	0	0	TRUE	0	0	0		Active
CHEMBL189110	0	0	0		1	0	0	TRUE	0	0	0		0	0	1	TRUE	0	0	0		Inconclusive
CHEMBL189116	1	0	0	TRUE	1	0	0	TRUE	0	0	0		0	0	0		0	0	0		Active
CHEMBL189146	0	0	0		1	0	0	TRUE	0	0	0		0	0	0		0	0	0		Inconclusive
CHEMBL189547	0	0	0		1	0	0	TRUE	0	0	0		1	0	0	TRUE	0	0	0		Inconclusive
CHEMBL190334	0	0	0		1	0	0	TRUE	0	0	0		1	0	0	TRUE	0	0	0		Inconclusive
CHEMBL190352	0	0	0		0	0	0		0	1	0	TRUE	0	0	1	TRUE	0	0	0		Inactive
CHEMBL190368	1	0	0	TRUE	0	0	2	TRUE	0	0	0		0	0	0		0	0	0		Inconclusive
CHEMBL190517	0	1	0	TRUE	1	0	0	TRUE	0	0	0		1	0	0	TRUE	0	0	0		Inconclusive
CHEMBL190603	0	0	0		1	0	0	TRUE	0	0	0		0	0	1	TRUE	0	0	0		Inconclusive
CHEMBL190645	1	0	0	TRUE	0	0	0		0	0	0		1	0	0	TRUE	0	0	0		Active
CHEMBL190665	0	0	0		1	0	0	TRUE	0	0	0		1	0	0	TRUE	0	0	0		Inconclusive
CHEMBL190739	0	0	0		1	0	0	TRUE	0	0	0		1	0	0	TRUE	0	0	0		Inconclusive
CHEMBL190905	0	0	1	TRUE	0	0	1	TRUE	0	0	0		0	0	0		0	0	0		Inconclusive
CHEMBL190968	0	0	0		1	0	0	TRUE	0	0	0		1	0	0	TRUE	0	0	0		Inconclusive
CHEMBL191060	1	0	0	TRUE	2	0	0	TRUE	0	0	0		0	0	0		0	0	0		Active
CHEMBL191087	1	0	0	TRUE	1	0	0	TRUE	0	0	0		1	0	0	TRUE	0	0	0		Active
CHEMBL191149	0	1	0	TRUE	1	0	0	TRUE	0	0	0		1	0	0	TRUE	0	0	0		Inconclusive
CHEMBL191235	1	0	0	TRUE	0	0	0		0	0	0		1	0	0	TRUE	0	0	0		Active
CHEMBL191275	5	0	0	TRUE	6	0	0	TRUE	1	0	0	TRUE	1	0	0	TRUE	0	0	0		Active
CHEMBL191556	1	0	0	TRUE	1	0	0	TRUE	0	0	0		1	0	0	TRUE	0	0	0		Active
CHEMBL192152	1	0	0	TRUE	0	0	0		0	0	0		1	0	0	TRUE	0	0	0		Active
CHEMBL192500	0	0	0		1	0	0	TRUE	0	0	0		1	0	0	TRUE	0	0	0		Inconclusive
CHEMBL192518	2	0	0	TRUE	3	0	0	TRUE	0	0	0		0	0	0		0	0	0		Active
CHEMBL192521	1	0	0	TRUE	1	0	0	TRUE	0	0	0		1	0	0	TRUE	0	0	0		Active
CHEMBL192582	0	0	0		1	0	0	TRUE	0	0	0		0	0	1	TRUE	0	0	0		Inconclusive
CHEMBL192609	0	0	0		1	0	0	TRUE	0	0	0		0	0	1	TRUE	0	0	0		Inconclusive
CHEMBL192636	0	0	0		1	0	0	TRUE	0	0	0		1	0	0	TRUE	0	0	0		Inconclusive
CHEMBL192638	0	0	0		1	0	0	TRUE	0	0	0		0	0	1	TRUE	0	0	0		Inconclusive
CHEMBL192646	1	0	0	TRUE	1	0	0	TRUE	0	0	0		1	0	0	TRUE	0	0	0		Active
CHEMBL192691	1	0	0	TRUE	1	0	0	TRUE	0	0	0		1	0	0	TRUE	0	0	0		Active
CHEMBL1927473	0	0	0		1	0	0	TRUE	0	0	0		0	0	0		0	0	0		Inconclusive
CHEMBL1927474	0	0	0		1	0	0	TRUE	0	0	0		0	0	0		0	0	0		Inconclusive
CHEMBL1927475	0	0	0		1	0	0	TRUE	0	0	0		0	0	0		0	0	0		Inconclusive
CHEMBL1927476	0	0	0		1	0	0	TRUE	0	0	0		0	0	0		0	0	0		Inconclusive
CHEMBL192894	2	0	0	TRUE	0	0	0		0	0	0		0	0	0		0	0	0		Inconclusive
CHEMBL192919	1	0	0	TRUE	1	0	0	TRUE	0	0	0		1	0	0	TRUE	0	0	0		Active
CHEMBL193082	1	0	0	TRUE	1	0	0	TRUE	0	0	0		1	0	0	TRUE	0	0	0		Active
CHEMBL1933075	0	0	0		1	0	0	TRUE	0	0	0		0	0	0		0	0	0		Inconclusive
CHEMBL1933093	1	0	0	TRUE	1	0	0	TRUE	0	0	0		0	0	0		0	0	0		Active
CHEMBL1933819	0	0	0		1	0	0	TRUE	0	0	0		0	0	0		0	0	0		Inconclusive
CHEMBL1933820	0	0	0		1	0	0	TRUE	0	0	0		0	0	0		0	0	0		Inconclusive
CHEMBL1933821	0	0	0		1	0	0	TRUE	0	0	0		0	0	0		0	0	0		Inconclusive
CHEMBL1933822	0	0	0		1	0	0	TRUE	0	0	0		1	0	0	TRUE	0	0	0		Inconclusive
CHEMBL1933823	0	0	0		1	0	0	TRUE	0	0	0		0	0	0		0	0	0		Inconclusive
CHEMBL1933824	0	0	0		1	0	0	TRUE	0	0	0		0	0	0		0	0	0		Inconclusive
CHEMBL1933825	0	0	0		1	0	0	TRUE	0	0	0		0	0	0		0	0	0		Inconclusive
CHEMBL1933826	0	0	0		1	0	0	TRUE	0	0	0		0	0	0		0	0	0		Inconclusive
CHEMBL1933827	0	0	0		1	0	0	TRUE	0	0	0		0	0	0		0	0	0		Inconclusive
CHEMBL1933828	0	0	0		1	0	0	TRUE	0	0	0		0	0	0		0	0	0		Inconclusive
CHEMBL1933829	0	0	0		1	0	0	TRUE	0	0	0		0	0	0		0	0	0		Inconclusive
CHEMBL1933830	0	0	0		1	0	0	TRUE	0	0	0		0	0	0		0	0	0		Inconclusive
CHEMBL1933831	0	0	0		1	0	0	TRUE	0	0	0		0	0	0		0	0	0		Inconclusive
CHEMBL1933832	0	0	0		1	0	0	TRUE	0	0	0		0	0	0		0	0	0		Inconclusive
CHEMBL1933833	0	0	0		1	0	0	TRUE	0	0	0		0	0	0		0	0	0		Inconclusive
CHEMBL1933834	0	0	0		1	0	0	TRUE	0	0	0		0	0	0		0	0	0		Inconclusive
CHEMBL1933835	0	0	0		1	0	0	TRUE	0	0	0		0	0	0		0	0	0		Inconclusive
CHEMBL1933836	0	0	0		1	0	0	TRUE	0	0	0		0	0	0		0	0	0		Inconclusive
CHEMBL1933837	0	0	0		0	0	0		0	1	0	TRUE	0	0	0		0	0	0		Inactive
CHEMBL1933838	0	0	0		1	0	0	TRUE	0	0	0		0	0	0		0	0	0		Inconclusive
CHEMBL1933839	0	0	0		1	0	0	TRUE	0	0	0		0	0	0		0	0	0		Inconclusive
CHEMBL1933840	0	0	0		1	0	0	TRUE	0	0	0		0	0	0		0	0	0		Inconclusive
CHEMBL1933841	0	0	0		1	0	0	TRUE	0	0	0		1	0	0	TRUE	0	0	0		Inconclusive
CHEMBL1933842	0	0	0		1	0	0	TRUE	0	0	0		1	0	0	TRUE	0	0	0		Inconclusive
CHEMBL1933843	0	0	0		1	0	0	TRUE	0	0	0		0	0	0		0	0	0		Inconclusive
CHEMBL1933844	0	0	0		1	0	0	TRUE	0	0	0		0	0	0		0	0	0		Inconclusive
CHEMBL1933845	0	0	0		1	0	0	TRUE	0	0	0		1	0	0	TRUE	0	0	0		Inconclusive
CHEMBL1933846	0	0	0		1	0	0	TRUE	0	0	0		0	0	0		0	0	0		Inconclusive
CHEMBL1933847	0	0	0		1	0	0	TRUE	0	0	0		0	0	0		0	0	0		Inconclusive
CHEMBL1934308	0	0	0		1	0	0	TRUE	0	0	0		0	0	0		0	0	0		Inconclusive
CHEMBL1934310	0	0	0		1	0	0	TRUE	0	0	0		0	0	0		0	0	0		Inconclusive
CHEMBL1934312	0	0	0		1	0	0	TRUE	0	0	0		0	0	0		0	0	0		Inconclusive
CHEMBL1934314	0	0	0		0	0	1	TRUE	0	0	0		0	0	0		0	0	0		Inconclusive
CHEMBL1934317	0	0	0		1	0	0	TRUE	0	0	0		0	0	0		0	0	0		Inconclusive
CHEMBL1934468	0	0	0		0	0	1	TRUE	0	0	0		0	0	0		0	0	0		Inconclusive
CHEMBL1934470	0	0	0		0	0	1	TRUE	0	0	0		0	0	0		0	0	0		Inconclusive
CHEMBL1934471	0	0	0		1	0	0	TRUE	0	0	0		0	0	0		0	0	0		Inconclusive
CHEMBL1934472	0	0	0		1	0	0	TRUE	0	0	0		0	0	0		0	0	0		Inconclusive
CHEMBL1934473	0	0	0		1	0	0	TRUE	0	0	0		0	0	0		0	0	0		Inconclusive
CHEMBL1934476	0	0	0		2	0	0	TRUE	0	0	0		0	0	0		0	0	0		Inconclusive
CHEMBL1934477	0	0	0		1	0	0	TRUE	0	0	0		0	0	0		0	0	0		Inconclusive
CHEMBL1934479	0	0	0		0	0	1	TRUE	0	0	0		0	0	0		0	0	0		Inconclusive
CHEMBL1934480	0	0	0		0	0	1	TRUE	0	0	0		0	0	0		0	0	0		Inconclusive
CHEMBL1934481	0	0	0		1	0	0	TRUE	0	0	0		0	0	0		0	0	0		Inconclusive
CHEMBL1934482	0	0	0		1	0	0	TRUE	0	0	0		0	0	0		0	0	0		Inconclusive
CHEMBL1934483	0	0	0		1	0	0	TRUE	0	0	0		0	0	0		0	0	0		Inconclusive
CHEMBL1934484	0	0	0		1	0	1	FALSE	0	0	0		0	0	0		0	0	0		Inconclusive
CHEMBL1934485	0	0	0		0	0	1	TRUE	0	0	0		0	0	0		0	0	0		Inconclusive
CHEMBL1934486	0	0	0		0	0	1	TRUE	0	0	0		0	0	0		0	0	0		Inconclusive
CHEMBL1935491	1	0	0	TRUE	1	0	0	TRUE	0	0	0		0	0	0		0	0	0		Active
CHEMBL1935492	1	0	0	TRUE	1	0	0	TRUE	0	0	0		0	0	0		0	0	0		Active
CHEMBL1935493	1	0	0	TRUE	1	0	0	TRUE	0	0	0		0	0	0		0	0	0		Active
CHEMBL1935494	1	0	0	TRUE	1	0	0	TRUE	0	0	0		0	0	0		0	0	0		Active
CHEMBL1935495	1	0	0	TRUE	1	0	0	TRUE	0	0	0		0	0	0		0	0	0		Active
CHEMBL1935496	1	0	0	TRUE	1	0	0	TRUE	0	0	0		0	0	0		0	0	0		Active
CHEMBL1935497	1	0	0	TRUE	1	0	0	TRUE	0	0	0		0	0	0		0	0	0		Active
CHEMBL1935498	1	0	0	TRUE	1	0	0	TRUE	0	0	0		0	0	0		0	0	0		Active
CHEMBL1935499	1	0	0	TRUE	1	0	0	TRUE	0	0	0		0	0	0		0	0	0		Active
CHEMBL1935500	1	0	0	TRUE	1	0	0	TRUE	0	0	0		0	0	0		0	0	0		Active
CHEMBL1935501	1	0	0	TRUE	1	0	0	TRUE	0	0	0		0	0	0		0	0	0		Active
CHEMBL1935607	1	0	0	TRUE	1	0	0	TRUE	0	0	0		0	0	0		0	0	0		Active
CHEMBL1935608	1	0	0	TRUE	1	0	0	TRUE	0	0	0		0	0	0		0	0	0		Active
CHEMBL1935609	1	0	0	TRUE	1	0	0	TRUE	0	0	0		0	0	0		0	0	0		Active
CHEMBL1935610	1	0	0	TRUE	1	0	0	TRUE	0	0	0		0	0	0		0	0	0		Active
CHEMBL1935611	1	0	0	TRUE	1	0	0	TRUE	0	0	0		0	0	0		0	0	0		Active
CHEMBL1935612	1	0	0	TRUE	1	0	0	TRUE	0	0	0		0	0	0		0	0	0		Active
CHEMBL1935613	1	0	0	TRUE	1	0	0	TRUE	0	0	0		0	0	0		0	0	0		Active
CHEMBL1935614	1	0	0	TRUE	1	0	0	TRUE	0	0	0		0	0	0		0	0	0		Active
CHEMBL1935615	1	0	0	TRUE	0	0	0		0	0	0		0	0	0		0	0	0		Inconclusive
CHEMBL1935616	1	0	0	TRUE	1	0	0	TRUE	0	0	0		0	0	0		0	0	0		Active
CHEMBL1935617	1	0	0	TRUE	1	0	0	TRUE	0	0	0		0	0	0		0	0	0		Active
CHEMBL1935618	1	0	0	TRUE	1	0	0	TRUE	0	0	0		0	0	0		0	0	0		Active
CHEMBL1935619	1	0	0	TRUE	1	0	0	TRUE	0	0	0		0	0	0		0	0	0		Active
CHEMBL1935620	1	0	0	TRUE	1	0	0	TRUE	0	0	0		0	0	0		0	0	0		Active
CHEMBL1944782	1	0	0	TRUE	1	0	0	TRUE	0	0	0		0	0	0		0	0	0		Active
CHEMBL1944783	1	0	0	TRUE	1	0	0	TRUE	0	0	0		0	0	0		0	0	0		Active
CHEMBL1945212	1	0	0	TRUE	1	0	0	TRUE	0	0	0		0	0	0		0	0	0		Active
CHEMBL1945213	1	0	0	TRUE	1	0	0	TRUE	0	0	0		0	0	0		0	0	0		Active
CHEMBL1945214	1	0	0	TRUE	1	0	0	TRUE	0	0	0		0	0	0		0	0	0		Active
CHEMBL1945215	1	0	0	TRUE	1	0	0	TRUE	0	0	0		0	0	0		0	0	0		Active
CHEMBL1945216	1	0	0	TRUE	1	0	0	TRUE	0	0	0		0	0	0		0	0	0		Active
CHEMBL1945217	0	0	0		1	0	0	TRUE	0	0	0		0	0	0		0	0	0		Inconclusive
CHEMBL1945218	1	0	0	TRUE	1	0	0	TRUE	0	0	0		0	0	0		0	0	0		Active
CHEMBL1945219	1	0	0	TRUE	1	0	0	TRUE	0	0	0		0	0	0		0	0	0		Active
CHEMBL1945220	1	0	0	TRUE	1	0	0	TRUE	0	0	0		0	0	0		0	0	0		Active
CHEMBL1945221	1	0	0	TRUE	1	0	0	TRUE	0	0	0		0	0	0		0	0	0		Active
CHEMBL1946566	1	0	0	TRUE	1	0	0	TRUE	0	0	0		1	0	0	TRUE	0	0	0		Active
CHEMBL1946567	1	0	0	TRUE	1	0	0	TRUE	0	0	0		1	0	0	TRUE	0	0	0		Active
CHEMBL1946568	1	0	0	TRUE	1	0	0	TRUE	0	0	0		1	0	0	TRUE	0	0	0		Active
CHEMBL1946570	1	0	0	TRUE	1	0	0	TRUE	0	0	0		1	0	0	TRUE	0	0	0		Active
CHEMBL1946571	1	0	0	TRUE	1	0	0	TRUE	0	0	0		1	0	0	TRUE	0	0	0		Active
CHEMBL1946572	1	0	0	TRUE	1	0	0	TRUE	0	0	0		1	0	0	TRUE	0	0	0		Active
CHEMBL1946753	1	0	0	TRUE	1	0	0	TRUE	0	0	0		1	0	0	TRUE	0	0	0		Active
CHEMBL1946754	1	0	0	TRUE	1	0	0	TRUE	0	0	0		1	0	0	TRUE	0	0	0		Active
CHEMBL1946755	1	0	0	TRUE	1	0	0	TRUE	0	0	0		1	0	0	TRUE	0	0	0		Active
CHEMBL1946756	1	0	0	TRUE	1	0	0	TRUE	0	0	0		1	0	0	TRUE	0	0	0		Active
CHEMBL1946757	1	0	0	TRUE	1	0	0	TRUE	0	0	0		1	0	0	TRUE	0	0	0		Active
CHEMBL1946758	1	0	0	TRUE	1	0	0	TRUE	0	0	0		1	0	0	TRUE	0	0	0		Active
CHEMBL1946952	0	0	1	TRUE	1	0	0	TRUE	0	0	0		1	0	0	TRUE	0	0	0		Inconclusive
CHEMBL1946953	1	0	0	TRUE	1	0	0	TRUE	0	0	0		1	0	0	TRUE	0	0	0		Active
CHEMBL194698	1	0	0	TRUE	1	0	0	TRUE	0	0	0		1	0	0	TRUE	0	0	0		Active
CHEMBL1947140	1	0	0	TRUE	1	0	0	TRUE	0	0	0		1	0	0	TRUE	0	0	0		Active
CHEMBL1947142	1	0	0	TRUE	1	0	0	TRUE	0	0	0		1	0	0	TRUE	0	0	0		Active
CHEMBL1947143	1	0	0	TRUE	1	0	0	TRUE	0	0	0		1	0	0	TRUE	0	0	0		Active
CHEMBL1947144	1	0	0	TRUE	1	0	0	TRUE	0	0	0		1	0	0	TRUE	1	0	0	TRUE	Active
CHEMBL1947145	1	0	0	TRUE	1	0	0	TRUE	0	0	0		1	0	0	TRUE	1	0	0	TRUE	Active
CHEMBL1947146	1	0	0	TRUE	1	0	0	TRUE	0	0	0		1	0	0	TRUE	0	0	0		Active
CHEMBL1947147	1	0	0	TRUE	1	0	0	TRUE	0	0	0		1	0	0	TRUE	0	0	0		Active
CHEMBL195367	0	0	0		1	0	0	TRUE	0	0	0		0	0	1	TRUE	0	0	0		Inconclusive
CHEMBL1956149	0	0	0		0	0	0		0	1	0	TRUE	0	0	0		0	0	0		Inactive
CHEMBL1956349	1	0	0	TRUE	1	0	0	TRUE	0	0	0		0	0	0		0	0	0		Active
CHEMBL1956350	1	0	0	TRUE	1	0	0	TRUE	0	0	0		0	0	0		0	0	0		Active
CHEMBL1956357	1	0	0	TRUE	0	0	1	TRUE	0	0	0		0	0	0		0	0	0		Inconclusive
CHEMBL1956358	1	0	0	TRUE	0	0	1	TRUE	0	0	0		0	0	0		0	0	0		Inconclusive
CHEMBL1956359	1	0	0	TRUE	0	0	1	TRUE	0	0	0		0	0	0		0	0	0		Inconclusive
CHEMBL1956360	1	0	0	TRUE	0	0	1	TRUE	0	0	0		0	0	0		0	0	0		Inconclusive
CHEMBL1956361	1	0	0	TRUE	0	0	1	TRUE	0	0	0		0	0	0		0	0	0		Inconclusive
CHEMBL1956362	1	0	0	TRUE	1	0	0	TRUE	0	0	0		0	0	0		0	0	0		Active
CHEMBL1956363	1	0	0	TRUE	1	0	0	TRUE	0	0	0		0	0	0		0	0	0		Active
CHEMBL1956364	1	0	0	TRUE	1	0	0	TRUE	0	0	0		0	0	0		0	0	0		Active
CHEMBL1956365	1	0	0	TRUE	0	0	1	TRUE	0	0	0		0	0	0		0	0	0		Inconclusive
CHEMBL1956366	1	0	0	TRUE	1	0	0	TRUE	0	0	0		0	0	0		0	0	0		Active
CHEMBL1956367	1	0	0	TRUE	1	0	0	TRUE	0	0	0		0	0	0		0	0	0		Active
CHEMBL1956368	1	0	0	TRUE	1	0	0	TRUE	0	0	0		0	0	0		0	0	0		Active
CHEMBL1956369	1	0	0	TRUE	0	0	1	TRUE	0	0	0		0	0	0		0	0	0		Inconclusive
CHEMBL1956370	1	0	0	TRUE	0	0	1	TRUE	0	0	0		0	0	0		0	0	0		Inconclusive
CHEMBL1956371	1	0	0	TRUE	0	0	1	TRUE	0	0	0		0	0	0		0	0	0		Inconclusive
CHEMBL1956877	0	0	0		1	0	0	TRUE	0	0	0		0	0	0		0	0	0		Inconclusive
CHEMBL196139	1	0	0	TRUE	1	0	0	TRUE	0	0	0		1	0	0	TRUE	0	0	0		Active
CHEMBL196227	1	0	0	TRUE	1	0	0	TRUE	0	0	0		1	0	0	TRUE	0	0	0		Active
CHEMBL196260	1	0	0	TRUE	1	0	0	TRUE	0	0	0		1	0	0	TRUE	0	0	0		Active
CHEMBL196261	1	0	0	TRUE	1	0	0	TRUE	0	0	0		1	0	0	TRUE	0	0	0		Active
CHEMBL196428	0	0	1	TRUE	0	0	0		0	0	0		1	0	0	TRUE	0	0	0		Inconclusive
CHEMBL196775	0	0	0		1	0	0	TRUE	0	0	0		1	0	0	TRUE	0	0	0		Inconclusive
CHEMBL197221	0	0	0		1	0	0	TRUE	0	0	0		1	0	0	TRUE	0	0	0		Inconclusive
CHEMBL197268	1	0	0	TRUE	1	0	0	TRUE	0	0	0		1	0	0	TRUE	0	0	0		Active
CHEMBL197496	0	0	0		1	0	0	TRUE	0	0	0		1	0	0	TRUE	0	0	0		Inconclusive
CHEMBL197527	0	0	0		1	0	0	TRUE	0	0	0		1	0	0	TRUE	0	0	0		Inconclusive
CHEMBL197671	1	0	0	TRUE	0	0	0		0	0	0		1	0	0	TRUE	0	0	0		Active
CHEMBL197684	1	0	0	TRUE	1	0	0	TRUE	0	0	0		1	0	0	TRUE	0	0	0		Active
CHEMBL197738	0	0	0		1	0	0	TRUE	0	0	0		1	0	0	TRUE	0	0	0		Inconclusive
CHEMBL197823	1	0	0	TRUE	0	0	0		0	0	0		1	0	0	TRUE	0	0	0		Active
CHEMBL197848	1	0	0	TRUE	1	0	0	TRUE	0	0	0		1	0	0	TRUE	0	0	0		Active
CHEMBL197866	0	0	0		1	0	0	TRUE	0	0	0		0	0	0		0	0	0		Inconclusive
CHEMBL197971	0	0	0		1	0	0	TRUE	0	0	0		0	0	0		0	0	0		Inconclusive
CHEMBL198023	0	0	0		1	0	0	TRUE	0	0	0		0	0	0		0	0	0		Inconclusive
CHEMBL198034	1	0	0	TRUE	1	0	0	TRUE	0	0	0		1	0	0	TRUE	0	0	0		Active
CHEMBL198091	1	0	0	TRUE	1	0	0	TRUE	0	0	0		1	0	0	TRUE	0	0	0		Active
CHEMBL198163	1	0	0	TRUE	1	0	0	TRUE	0	0	0		1	0	0	TRUE	0	0	0		Active
CHEMBL198166	1	0	0	TRUE	1	0	0	TRUE	0	0	0		1	0	0	TRUE	0	0	0		Active
CHEMBL198170	1	0	0	TRUE	1	0	0	TRUE	0	0	0		1	0	0	TRUE	0	0	0		Active
CHEMBL198207	1	0	0	TRUE	1	0	0	TRUE	0	0	0		1	0	0	TRUE	0	0	0		Active
CHEMBL198266	1	0	0	TRUE	1	0	0	TRUE	0	0	0		1	0	0	TRUE	0	0	0		Active
CHEMBL198269	1	0	0	TRUE	1	0	0	TRUE	0	0	0		1	0	0	TRUE	0	0	0		Active
CHEMBL198288	0	0	0		1	0	0	TRUE	0	0	0		0	0	0		0	0	0		Inconclusive
CHEMBL198365	0	0	1	TRUE	1	0	0	TRUE	0	0	0		1	0	0	TRUE	0	0	0		Inconclusive
CHEMBL198406	0	0	0		0	0	0		1	0	0	TRUE	0	0	0		0	0	0		Inconclusive
CHEMBL198493	1	0	0	TRUE	1	0	0	TRUE	0	0	0		1	0	0	TRUE	0	0	0		Active
CHEMBL198529	0	0	0		1	0	0	TRUE	0	0	0		1	0	0	TRUE	0	0	0		Inconclusive
CHEMBL198579	0	0	0		1	0	0	TRUE	0	0	0		1	0	0	TRUE	0	0	0		Inconclusive
CHEMBL198605	1	0	0	TRUE	1	0	0	TRUE	0	0	0		1	0	0	TRUE	0	0	0		Active
CHEMBL198623	1	0	0	TRUE	1	0	0	TRUE	0	0	0		1	0	0	TRUE	0	0	0		Active
CHEMBL198708	1	0	0	TRUE	1	0	0	TRUE	0	0	0		1	0	0	TRUE	0	0	0		Active
CHEMBL198786	0	0	0		1	0	0	TRUE	0	0	0		1	0	0	TRUE	0	0	0		Inconclusive
CHEMBL198929	0	0	0		1	0	0	TRUE	0	0	0		1	0	0	TRUE	0	0	0		Inconclusive
CHEMBL199121	1	0	0	TRUE	1	0	0	TRUE	0	0	0		1	0	0	TRUE	0	0	0		Active
CHEMBL199125	1	0	0	TRUE	1	0	0	TRUE	0	0	0		1	0	0	TRUE	0	0	0		Active
CHEMBL199172	1	0	0	TRUE	1	0	0	TRUE	0	0	0		1	0	0	TRUE	0	0	0		Active
CHEMBL199244	1	0	0	TRUE	1	0	0	TRUE	0	0	0		1	0	0	TRUE	0	0	0		Active
CHEMBL199324	0	0	0		2	0	0	TRUE	0	0	0		0	0	0		0	0	0		Inconclusive
CHEMBL199339	0	0	0		1	0	0	TRUE	0	0	0		0	0	0		0	0	0		Inconclusive
CHEMBL199362	0	0	0		1	0	0	TRUE	0	0	0		0	0	0		0	0	0		Inconclusive
CHEMBL199372	0	0	0		1	0	0	TRUE	0	0	0		0	0	0		0	0	0		Inconclusive
CHEMBL199373	0	0	0		2	0	0	TRUE	0	0	0		0	0	0		0	0	0		Inconclusive
CHEMBL199380	0	0	0		0	0	0		1	0	0	TRUE	0	0	0		0	0	0		Inconclusive
CHEMBL199398	0	0	0		1	0	0	TRUE	0	0	0		0	0	0		0	0	0		Inconclusive
CHEMBL199400	0	0	0		0	0	0		1	0	0	TRUE	0	0	0		0	0	0		Inconclusive
CHEMBL199432	0	0	0		1	0	0	TRUE	0	0	0		0	0	0		0	0	0		Inconclusive
CHEMBL199449	0	0	0		1	0	0	TRUE	0	0	0		0	0	0		0	0	0		Inconclusive
CHEMBL199459	0	0	0		1	0	0	TRUE	0	0	0		0	0	0		0	0	0		Inconclusive
CHEMBL199472	0	0	0		0	0	0		1	0	0	TRUE	0	0	0		0	0	0		Inconclusive
CHEMBL199509	0	0	0		1	0	0	TRUE	0	0	0		0	0	0		0	0	0		Inconclusive
CHEMBL199526	0	0	0		1	0	0	TRUE	0	0	0		0	0	0		0	0	0		Inconclusive
CHEMBL199530	0	0	0		1	0	0	TRUE	0	0	0		0	0	0		0	0	0		Inconclusive
CHEMBL199559	0	0	0		1	0	0	TRUE	0	0	0		0	0	0		0	0	0		Inconclusive
CHEMBL199579	0	0	0		1	0	0	TRUE	0	0	0		0	0	0		0	0	0		Inconclusive
CHEMBL199645	0	0	0		1	0	0	TRUE	0	0	0		0	0	0		0	0	0		Inconclusive
CHEMBL199677	0	0	0		1	0	0	TRUE	0	0	0		0	0	0		0	0	0		Inconclusive
CHEMBL199703	0	0	0		1	0	0	TRUE	0	0	0		0	0	0		0	0	0		Inconclusive
CHEMBL199730	0	0	0		1	0	0	TRUE	0	0	0		0	0	0		0	0	0		Inconclusive
CHEMBL199782	0	0	0		1	0	0	TRUE	0	0	0		0	0	0		0	0	0		Inconclusive
CHEMBL199794	0	0	0		1	0	0	TRUE	0	0	0		0	0	0		0	0	0		Inconclusive
CHEMBL199814	0	0	0		1	0	0	TRUE	0	0	0		0	0	0		0	0	0		Inconclusive
CHEMBL199819	0	0	0		1	0	0	TRUE	0	0	0		0	0	0		0	0	0		Inconclusive
CHEMBL199823	0	0	0		1	0	0	TRUE	0	0	0		0	0	0		0	0	0		Inconclusive
CHEMBL199846	0	0	0		1	0	0	TRUE	0	0	0		0	0	0		0	0	0		Inconclusive
CHEMBL199855	0	0	0		1	0	0	TRUE	0	0	0		0	0	0		0	0	0		Inconclusive
CHEMBL199928	0	0	0		1	0	0	TRUE	0	0	0		0	0	0		0	0	0		Inconclusive
CHEMBL200003	0	0	0		0	0	0		1	0	0	TRUE	0	0	0		0	0	0		Inconclusive
CHEMBL200043	0	0	0		1	0	0	TRUE	0	0	0		0	0	0		0	0	0		Inconclusive
CHEMBL200045	0	0	0		1	0	0	TRUE	0	0	0		0	0	0		0	0	0		Inconclusive
CHEMBL200071	0	0	0		1	0	0	TRUE	0	0	0		0	0	0		0	0	0		Inconclusive
CHEMBL200122	0	0	0		1	0	0	TRUE	0	0	0		0	0	0		0	0	0		Inconclusive
CHEMBL200138	0	0	0		1	0	0	TRUE	0	0	0		0	0	0		0	0	0		Inconclusive
CHEMBL200162	0	0	0		1	0	0	TRUE	0	0	0		0	0	0		0	0	0		Inconclusive
CHEMBL200207	0	0	0		1	0	0	TRUE	0	0	0		0	0	0		0	0	0		Inconclusive
CHEMBL200305	0	0	0		1	0	0	TRUE	0	0	0		0	0	0		0	0	0		Inconclusive
CHEMBL200495	0	0	0		2	0	0	TRUE	0	0	0		2	0	0	TRUE	0	0	0		Inconclusive
CHEMBL200571	0	0	0		1	0	0	TRUE	0	0	0		0	0	0		0	0	0		Inconclusive
CHEMBL200610	0	0	0		1	0	0	TRUE	0	0	0		0	0	0		0	0	0		Inconclusive
CHEMBL200611	0	0	0		1	0	0	TRUE	0	0	0		0	0	0		0	0	0		Inconclusive
CHEMBL200746	0	0	0		1	0	0	TRUE	0	0	0		0	0	0		0	0	0		Inconclusive
CHEMBL200760	0	0	0		1	0	0	TRUE	0	0	0		0	0	0		0	0	0		Inconclusive
CHEMBL200781	0	0	0		1	0	0	TRUE	0	0	0		0	0	0		0	0	0		Inconclusive
CHEMBL200810	0	0	0		1	0	0	TRUE	0	0	0		0	0	0		0	0	0		Inconclusive
CHEMBL200811	0	0	0		1	0	0	TRUE	0	0	0		0	0	0		0	0	0		Inconclusive
CHEMBL200840	0	0	0		1	0	0	TRUE	0	0	0		0	0	0		0	0	0		Inconclusive
CHEMBL200893	0	0	0		1	0	0	TRUE	0	0	0		0	0	0		0	0	0		Inconclusive
CHEMBL200908	0	0	0		1	0	0	TRUE	0	0	0		0	0	0		0	0	0		Inconclusive
CHEMBL200916	0	0	0		1	0	0	TRUE	0	0	0		0	0	0		0	0	0		Inconclusive
CHEMBL200943	0	0	0		1	0	0	TRUE	0	0	0		0	0	0		0	0	0		Inconclusive
CHEMBL200952	0	0	0		1	0	0	TRUE	0	0	0		1	0	0	TRUE	0	0	0		Inconclusive
CHEMBL200984	0	0	0		1	0	0	TRUE	0	0	0		1	0	0	TRUE	0	0	0		Inconclusive
CHEMBL201036	0	0	0		1	0	0	TRUE	0	0	0		1	0	0	TRUE	0	0	0		Inconclusive
CHEMBL2011538	0	0	0		0	0	1	TRUE	0	0	0		0	0	0		0	0	0		Inconclusive
CHEMBL2011539	0	0	0		0	0	1	TRUE	0	0	0		0	0	0		0	0	0		Inconclusive
CHEMBL2011540	0	0	0		0	0	1	TRUE	0	0	0		0	0	0		0	0	0		Inconclusive
CHEMBL2011541	0	0	0		0	0	1	TRUE	0	0	0		0	0	0		0	0	0		Inconclusive
CHEMBL2011543	0	0	0		0	0	1	TRUE	0	0	0		0	0	0		0	0	0		Inconclusive
CHEMBL2011544	0	0	0		1	0	0	TRUE	0	0	0		0	0	0		0	0	0		Inconclusive
CHEMBL2011545	0	0	0		0	0	1	TRUE	0	0	0		0	0	0		0	0	0		Inconclusive
CHEMBL201202	0	0	0		0	0	0		0	1	0	TRUE	0	0	0		0	0	0		Inactive
CHEMBL20125	0	0	0		2	0	0	TRUE	0	0	0		0	0	0		0	0	0		Inconclusive
CHEMBL201280	0	0	0		1	0	0	TRUE	0	0	0		0	0	0		0	0	0		Inconclusive
CHEMBL201482	0	0	0		0	0	0		1	0	0	TRUE	0	0	0		0	0	0		Inconclusive
CHEMBL201581	0	0	0		1	0	0	TRUE	0	0	0		1	0	0	TRUE	0	0	0		Inconclusive
CHEMBL201632	0	0	0		1	0	0	TRUE	0	0	0		0	0	0		0	0	0		Inconclusive
CHEMBL201653	0	0	0		1	0	0	TRUE	0	0	0		1	0	0	TRUE	0	0	0		Inconclusive
CHEMBL201803	0	0	0		1	0	0	TRUE	0	0	0		0	0	0		0	0	0		Inconclusive
CHEMBL201832	0	0	0		1	0	0	TRUE	0	0	0		0	0	0		0	0	0		Inconclusive
CHEMBL201880	0	0	0		2	0	0	TRUE	1	0	0	TRUE	1	0	0	TRUE	0	0	0		Inconclusive
CHEMBL202087	0	0	0		1	0	0	TRUE	0	0	0		0	0	0		0	0	0		Inconclusive
CHEMBL202118	0	0	0		1	0	0	TRUE	0	1	0	TRUE	0	0	0		0	0	0		Inconclusive
CHEMBL202137	0	0	0		1	0	0	TRUE	0	0	0		0	0	0		0	0	0		Inconclusive
CHEMBL202140	0	0	0		1	0	0	TRUE	0	0	0		1	0	0	TRUE	0	0	0		Inconclusive
CHEMBL2021928	0	0	0		1	0	0	TRUE	0	0	0		0	0	0		0	0	0		Inconclusive
CHEMBL2021930	0	0	0		1	0	0	TRUE	0	0	0		0	0	0		0	0	0		Inconclusive
CHEMBL2022125	0	0	0		1	0	0	TRUE	0	0	0		0	0	0		0	0	0		Inconclusive
CHEMBL2022126	0	0	0		1	0	0	TRUE	0	0	0		0	0	0		0	0	0		Inconclusive
CHEMBL2022127	0	0	0		1	0	0	TRUE	0	0	0		0	0	0		0	0	0		Inconclusive
CHEMBL2022128	0	0	0		1	0	0	TRUE	0	0	0		0	0	0		0	0	0		Inconclusive
CHEMBL2022129	0	0	0		1	0	0	TRUE	0	0	0		0	0	0		0	0	0		Inconclusive
CHEMBL2022130	0	0	0		1	0	0	TRUE	0	0	0		0	0	0		0	0	0		Inconclusive
CHEMBL2022131	0	0	0		1	0	0	TRUE	0	0	0		0	0	0		0	0	0		Inconclusive
CHEMBL2022132	0	0	0		1	0	0	TRUE	0	0	0		0	0	0		0	0	0		Inconclusive
CHEMBL2022133	0	0	0		1	0	0	TRUE	0	0	0		0	0	0		0	0	0		Inconclusive
CHEMBL2022134	0	0	0		1	0	0	TRUE	0	0	0		0	0	0		0	0	0		Inconclusive
CHEMBL202236	0	0	0		1	0	0	TRUE	0	0	0		0	0	0		0	0	0		Inconclusive
CHEMBL202240	0	0	0		1	0	0	TRUE	0	0	0		1	0	0	TRUE	0	0	0		Inconclusive
CHEMBL202242	0	0	0		0	0	0		0	1	0	TRUE	0	0	0		0	0	0		Inactive
CHEMBL202243	0	0	0		0	0	0		1	0	0	TRUE	0	0	0		0	0	0		Inconclusive
CHEMBL202246	0	0	0		1	0	0	TRUE	0	0	0		1	0	0	TRUE	0	0	0		Inconclusive
CHEMBL202251	0	0	0		0	0	0		0	1	0	TRUE	0	0	0		0	0	0		Inactive
CHEMBL2022743	0	0	0		1	0	0	TRUE	0	0	0		0	0	0		0	0	0		Inconclusive
CHEMBL2022744	0	0	0		1	0	0	TRUE	0	0	0		0	0	0		0	0	0		Inconclusive
CHEMBL2022745	0	0	0		1	0	0	TRUE	0	0	0		0	0	0		0	0	0		Inconclusive
CHEMBL2022746	0	0	0		1	0	0	TRUE	0	0	0		0	0	0		0	0	0		Inconclusive
CHEMBL2022747	0	0	0		1	0	0	TRUE	0	0	0		0	0	0		0	0	0		Inconclusive
CHEMBL2022748	0	0	0		1	0	0	TRUE	0	0	0		0	0	0		0	0	0		Inconclusive
CHEMBL202361	0	0	0		0	0	0		0	1	0	TRUE	0	0	0		0	0	0		Inactive
CHEMBL2024604	0	0	0		1	0	0	TRUE	0	0	0		0	0	0		0	0	0		Inconclusive
CHEMBL2024605	0	0	0		1	0	0	TRUE	0	0	0		0	0	0		0	0	0		Inconclusive
CHEMBL2024606	0	0	0		1	0	0	TRUE	0	0	0		1	0	0	TRUE	0	0	0		Inconclusive
CHEMBL2024607	0	0	0		1	0	0	TRUE	0	0	0		0	0	0		0	0	0		Inconclusive
CHEMBL2024608	0	0	0		1	0	0	TRUE	0	0	0		0	0	0		0	0	0		Inconclusive
CHEMBL2024609	0	0	0		1	0	0	TRUE	0	0	0		0	0	0		0	0	0		Inconclusive
CHEMBL2024610	0	0	0		1	0	0	TRUE	0	0	0		0	0	0		0	0	0		Inconclusive
CHEMBL2024611	0	0	0		1	0	0	TRUE	0	0	0		0	0	0		0	0	0		Inconclusive
CHEMBL2024612	0	0	0		1	0	0	TRUE	0	0	0		0	0	0		0	0	0		Inconclusive
CHEMBL2024613	0	0	0		1	0	0	TRUE	0	0	0		0	0	0		0	0	0		Inconclusive
CHEMBL2024614	0	0	0		1	0	0	TRUE	0	0	0		0	0	0		0	0	0		Inconclusive
CHEMBL2024615	0	0	0		1	0	0	TRUE	0	0	0		0	0	0		0	0	0		Inconclusive
CHEMBL2024617	0	0	0		1	0	0	TRUE	0	0	0		0	0	0		0	0	0		Inconclusive
CHEMBL2024618	0	0	0		1	0	0	TRUE	0	0	0		0	0	0		0	0	0		Inconclusive
CHEMBL2024619	0	0	0		1	0	0	TRUE	0	0	0		0	0	0		0	0	0		Inconclusive
CHEMBL202515	0	0	0		1	0	0	TRUE	0	0	0		1	0	0	TRUE	0	0	0		Inconclusive
CHEMBL202609	0	0	0		1	0	0	TRUE	0	0	0		0	0	0		0	0	0		Inconclusive
CHEMBL202617	0	0	0		1	0	0	TRUE	0	0	0		1	0	0	TRUE	0	0	0		Inconclusive
CHEMBL202739	0	0	0		1	0	0	TRUE	0	0	0		2	0	0	TRUE	0	0	0		Inconclusive
CHEMBL20280	0	0	0		1	0	0	TRUE	0	0	0		0	0	0		0	0	0		Inconclusive
CHEMBL202973	0	0	0		0	0	0		0	1	0	TRUE	0	0	0		0	1	0	TRUE	Inactive
CHEMBL2031856	1	0	0	TRUE	0	0	1	TRUE	0	0	0		1	0	0	TRUE	0	0	0		Active
CHEMBL2031858	0	0	0		1	0	0	TRUE	0	0	0		1	0	0	TRUE	0	0	0		Inconclusive
CHEMBL2031859	1	0	0	TRUE	0	0	0		0	0	0		1	0	0	TRUE	0	0	0		Active
CHEMBL2031860	1	0	0	TRUE	0	0	1	TRUE	0	0	0		1	0	0	TRUE	0	0	0		Active
CHEMBL2031952	0	0	0		1	0	0	TRUE	0	0	0		1	0	0	TRUE	0	0	0		Inconclusive
CHEMBL2031954	1	0	0	TRUE	0	0	0		0	0	0		1	0	0	TRUE	0	0	0		Active
CHEMBL2031955	0	0	0		1	0	0	TRUE	0	0	0		1	0	0	TRUE	0	0	0		Inconclusive
CHEMBL2031956	1	0	0	TRUE	1	0	0	TRUE	0	0	0		1	0	0	TRUE	0	0	0		Active
CHEMBL2031957	1	0	0	TRUE	1	0	0	TRUE	0	0	0		1	0	0	TRUE	0	0	0		Active
CHEMBL203338	0	0	0		0	0	0		0	1	0	TRUE	0	0	0		0	1	0	TRUE	Inactive
CHEMBL203408	0	0	0		0	0	0		0	1	0	TRUE	0	0	0		0	1	0	TRUE	Inactive
CHEMBL203409	0	0	0		1	0	0	TRUE	0	0	0		0	0	0		0	1	0	TRUE	Inconclusive
CHEMBL2035057	0	0	0		1	0	0	TRUE	0	0	0		0	0	0		0	0	0		Inconclusive
CHEMBL2035058	0	0	0		1	0	0	TRUE	0	0	0		0	0	0		0	0	0		Inconclusive
CHEMBL2035059	0	0	0		1	0	0	TRUE	0	0	0		0	0	0		0	0	0		Inconclusive
CHEMBL2035060	0	0	0		1	0	0	TRUE	0	0	0		0	0	0		0	0	0		Inconclusive
CHEMBL2035061	0	0	0		1	0	0	TRUE	0	0	0		0	0	0		0	0	0		Inconclusive
CHEMBL2035062	0	0	0		1	0	0	TRUE	0	0	0		0	0	0		0	0	0		Inconclusive
CHEMBL2035063	0	0	0		1	0	0	TRUE	0	0	0		0	0	0		0	0	0		Inconclusive
CHEMBL2035064	0	0	0		1	0	0	TRUE	0	0	0		0	0	0		0	0	0		Inconclusive
CHEMBL2035065	0	0	0		1	0	0	TRUE	0	0	0		0	0	0		0	0	0		Inconclusive
CHEMBL2035066	0	0	0		1	0	0	TRUE	0	0	0		0	0	0		0	0	0		Inconclusive
CHEMBL2035067	0	0	0		1	0	0	TRUE	0	0	0		0	0	0		0	0	0		Inconclusive
CHEMBL2035068	0	0	0		1	0	0	TRUE	0	0	0		0	0	0		0	0	0		Inconclusive
CHEMBL2035069	0	0	0		1	0	0	TRUE	0	0	0		0	0	0		0	0	0		Inconclusive
CHEMBL2035070	0	0	0		1	0	0	TRUE	0	0	0		0	0	0		0	0	0		Inconclusive
CHEMBL2035071	0	0	0		1	0	0	TRUE	0	0	0		0	0	0		0	0	0		Inconclusive
CHEMBL203621	0	0	0		0	0	0		0	1	0	TRUE	1	0	0	TRUE	0	0	0		Inactive
CHEMBL2036277	0	0	0		1	0	0	TRUE	0	0	0		0	0	0		0	0	0		Inconclusive
CHEMBL2036278	0	0	0		0	0	1	TRUE	0	0	0		0	0	0		0	0	0		Inconclusive
CHEMBL2036279	0	0	0		0	0	0		0	1	0	TRUE	0	0	0		0	0	0		Inactive
CHEMBL2036280	0	0	0		0	0	0		0	1	0	TRUE	0	0	0		0	0	0		Inactive
CHEMBL2036281	0	0	0		0	0	0		0	1	0	TRUE	0	0	0		0	0	0		Inactive
CHEMBL2037577	0	0	0		1	0	0	TRUE	0	0	0		0	0	0		0	0	0		Inconclusive
CHEMBL2037578	0	0	0		1	0	0	TRUE	0	0	0		0	0	0		0	0	0		Inconclusive
CHEMBL2037579	0	0	0		1	0	0	TRUE	0	0	0		0	0	0		0	0	0		Inconclusive
CHEMBL2037580	0	0	0		1	0	0	TRUE	0	0	0		0	0	0		0	0	0		Inconclusive
CHEMBL2037581	0	0	0		1	0	0	TRUE	0	0	0		0	0	0		0	0	0		Inconclusive
CHEMBL2037582	0	0	0		1	0	0	TRUE	0	0	0		0	0	0		0	0	0		Inconclusive
CHEMBL2037583	0	0	0		1	0	0	TRUE	0	0	0		0	0	0		0	0	0		Inconclusive
CHEMBL2037584	0	0	0		1	0	0	TRUE	0	0	0		0	0	0		0	0	0		Inconclusive
CHEMBL2037585	0	0	0		1	0	0	TRUE	0	0	0		0	0	0		0	0	0		Inconclusive
CHEMBL2037586	0	0	0		1	0	0	TRUE	0	0	0		0	0	0		0	0	0		Inconclusive
CHEMBL2037587	0	0	0		1	0	0	TRUE	0	0	0		0	0	0		0	0	0		Inconclusive
CHEMBL2037588	0	0	0		1	0	0	TRUE	0	0	0		0	0	0		0	0	0		Inconclusive
CHEMBL20392	0	0	0		1	0	0	TRUE	0	0	0		0	0	0		0	0	0		Inconclusive
CHEMBL203940	0	0	0		0	0	0		0	1	0	TRUE	0	0	0		0	1	0	TRUE	Inactive
CHEMBL203986	0	0	0		0	0	0		1	0	0	TRUE	0	0	0		0	0	0		Inconclusive
CHEMBL204037	0	0	0		0	0	0		0	1	0	TRUE	0	0	0		0	0	0		Inactive
CHEMBL2042802	1	0	0	TRUE	1	0	0	TRUE	0	0	0		0	0	0		0	0	0		Active
CHEMBL2042803	1	0	0	TRUE	1	0	0	TRUE	0	0	0		0	0	0		0	0	0		Active
CHEMBL2042804	1	0	0	TRUE	1	0	0	TRUE	0	0	0		0	0	0		0	0	0		Active
CHEMBL2042805	1	0	0	TRUE	1	0	0	TRUE	0	0	0		0	0	0		0	0	0		Active
CHEMBL2042806	1	0	0	TRUE	1	0	0	TRUE	0	0	0		0	0	0		0	0	0		Active
CHEMBL2042807	1	0	0	TRUE	1	0	0	TRUE	0	0	0		0	0	0		0	0	0		Active
CHEMBL2042808	1	0	0	TRUE	1	0	0	TRUE	0	0	0		0	0	0		0	0	0		Active
CHEMBL2042809	1	0	0	TRUE	1	0	0	TRUE	0	0	0		0	0	0		0	0	0		Active
CHEMBL2042810	1	0	0	TRUE	1	0	0	TRUE	0	0	0		0	0	0		0	0	0		Active
CHEMBL2042811	1	0	0	TRUE	1	0	0	TRUE	0	0	0		0	0	0		0	0	0		Active
CHEMBL2042812	1	0	0	TRUE	1	0	0	TRUE	0	0	0		0	0	0		0	0	0		Active
CHEMBL2042813	1	0	0	TRUE	1	0	0	TRUE	0	0	0		0	0	0		0	0	0		Active
CHEMBL2042814	2	0	0	TRUE	2	0	0	TRUE	0	0	0		0	0	0		0	0	0		Active
CHEMBL20495	0	0	0		1	0	0	TRUE	0	0	0		0	0	0		0	0	0		Inconclusive
CHEMBL205665	0	0	0		0	0	0		0	1	0	TRUE	1	0	0	TRUE	0	0	0		Inactive
CHEMBL205803	0	0	0		0	0	0		0	1	0	TRUE	0	0	0		0	1	0	TRUE	Inactive
CHEMBL206202	0	0	0		0	0	0		0	1	0	TRUE	1	0	0	TRUE	0	0	0		Inactive
CHEMBL2064741	1	0	0	TRUE	1	0	0	TRUE	0	0	1	TRUE	2	0	0	TRUE	0	0	0		Active
CHEMBL2064742	1	0	0	TRUE	1	0	0	TRUE	0	0	1	TRUE	2	0	0	TRUE	0	0	0		Active
CHEMBL2064743	1	0	0	TRUE	1	0	0	TRUE	0	0	1	TRUE	2	0	0	TRUE	0	0	0		Active
CHEMBL206578	0	0	0		1	0	0	TRUE	0	0	0		0	0	0		0	0	0		Inconclusive
CHEMBL206759	0	0	0		1	0	0	TRUE	0	0	0		0	0	0		0	1	0	TRUE	Inconclusive
CHEMBL206895	0	0	0		1	0	0	TRUE	0	0	0		0	0	0		0	0	0		Inconclusive
CHEMBL207198	0	0	0		1	0	0	TRUE	0	0	0		0	0	0		0	0	0		Inconclusive
CHEMBL207318	0	0	0		1	0	0	TRUE	0	0	0		0	0	0		0	0	0		Inconclusive
CHEMBL207449	0	0	0		1	0	0	TRUE	0	0	0		0	0	0		0	0	0		Inconclusive
CHEMBL207569	0	0	0		1	0	0	TRUE	0	0	0		0	0	0		0	0	0		Inconclusive
CHEMBL207570	1	0	0	TRUE	1	0	0	TRUE	0	0	0		0	0	0		0	0	0		Active
CHEMBL207811	0	0	0		1	0	0	TRUE	0	0	0		0	0	0		0	0	0		Inconclusive
CHEMBL207881	1	0	0	TRUE	0	0	0		0	0	0		1	0	0	TRUE	0	0	0		Active
CHEMBL207887	0	0	0		1	0	0	TRUE	0	0	0		0	0	0		0	0	0		Inconclusive
CHEMBL207957	0	0	0		1	0	0	TRUE	0	0	0		0	0	0		0	0	0		Inconclusive
CHEMBL208202	0	0	0		1	0	0	TRUE	0	0	0		0	0	0		0	0	0		Inconclusive
CHEMBL208203	0	0	0		1	0	0	TRUE	0	0	0		0	0	0		0	0	0		Inconclusive
CHEMBL208318	0	0	0		1	0	0	TRUE	0	0	0		0	0	0		0	0	0		Inconclusive
CHEMBL208472	0	0	0		2	0	0	TRUE	0	0	0		1	0	0	TRUE	0	0	0		Inconclusive
CHEMBL208601	0	0	0		1	0	0	TRUE	0	0	0		0	0	0		0	0	0		Inconclusive
CHEMBL208755	0	0	0		1	0	0	TRUE	0	0	0		0	0	0		0	0	0		Inconclusive
CHEMBL209145	0	0	0		0	0	0		0	1	0	TRUE	0	0	0		0	0	0		Inactive
CHEMBL209364	0	0	0		1	0	0	TRUE	0	0	0		0	0	0		0	0	0		Inconclusive
CHEMBL209546	1	0	0	TRUE	1	0	0	TRUE	0	0	0		1	0	0	TRUE	0	0	0		Active
CHEMBL209595	0	0	0		1	0	0	TRUE	0	0	0		0	0	0		0	0	0		Inconclusive
CHEMBL209749	1	0	0	TRUE	1	0	0	TRUE	0	0	0		1	0	0	TRUE	0	0	0		Active
CHEMBL210017	1	0	0	TRUE	1	0	0	TRUE	0	0	0		1	0	0	TRUE	0	0	0		Active
CHEMBL210057	0	0	0		1	0	0	TRUE	0	0	0		0	0	0		0	0	0		Inconclusive
CHEMBL210162	1	0	0	TRUE	1	0	0	TRUE	0	0	0		0	0	0		0	0	0		Active
CHEMBL210163	1	0	0	TRUE	1	0	0	TRUE	0	0	0		1	0	0	TRUE	0	0	0		Active
CHEMBL210372	0	0	0		0	0	0		0	1	0	TRUE	0	0	0		0	0	0		Inactive
CHEMBL2103824	1	0	0	TRUE	0	0	1	TRUE	0	0	0		0	0	0		0	0	0		Inconclusive
CHEMBL210469	0	0	0		2	0	0	TRUE	0	0	0		0	0	0		0	0	0		Inconclusive
CHEMBL210873	0	0	0		1	0	0	TRUE	0	0	0		0	0	0		0	0	0		Inconclusive
CHEMBL211047	0	0	0		1	0	0	TRUE	0	0	0		0	0	0		0	0	0		Inconclusive
CHEMBL21105	0	0	0		1	0	0	TRUE	0	0	0		0	0	0		0	0	0		Inconclusive
CHEMBL2112020	0	0	0		1	0	0	TRUE	0	0	0		1	0	0	TRUE	0	0	0		Inconclusive
CHEMBL2112021	0	0	0		1	0	0	TRUE	0	0	0		1	0	0	TRUE	0	0	0		Inconclusive
CHEMBL211237	0	0	0		0	0	1	TRUE	0	0	0		0	0	0		0	0	0		Inconclusive
CHEMBL2112870	0	0	0		1	0	0	TRUE	0	0	0		1	0	0	TRUE	0	0	0		Inconclusive
CHEMBL2112871	0	0	0		1	0	0	TRUE	0	0	0		1	0	0	TRUE	0	0	0		Inconclusive
CHEMBL2113104	1	0	0	TRUE	1	0	0	TRUE	0	0	0		1	0	0	TRUE	0	0	0		Active
CHEMBL2113105	1	0	0	TRUE	1	0	0	TRUE	0	0	0		1	0	0	TRUE	0	0	0		Active
CHEMBL2113106	1	0	0	TRUE	1	0	0	TRUE	0	0	0		1	0	0	TRUE	0	0	0		Active
CHEMBL2113107	1	0	0	TRUE	1	0	0	TRUE	0	0	0		1	0	0	TRUE	0	0	0		Active
CHEMBL2113108	1	0	0	TRUE	1	0	0	TRUE	0	0	0		1	0	0	TRUE	0	0	0		Active
CHEMBL2113109	1	0	0	TRUE	1	0	0	TRUE	0	0	0		1	0	0	TRUE	0	0	0		Active
CHEMBL2113219	0	0	0		0	0	0		0	1	0	TRUE	0	0	0		0	1	0	TRUE	Inactive
CHEMBL211371	1	0	0	TRUE	1	0	0	TRUE	0	0	0		1	0	0	TRUE	0	0	0		Active
CHEMBL211473	0	0	0		2	0	0	TRUE	0	0	0		0	0	0		0	0	0		Inconclusive
CHEMBL211513	1	0	0	TRUE	1	0	0	TRUE	0	0	0		1	0	0	TRUE	0	0	0		Active
CHEMBL211554	0	0	0		0	0	0		0	1	0	TRUE	0	0	0		0	0	0		Inactive
CHEMBL211597	0	0	0		0	0	3	TRUE	0	0	0		0	0	0		0	0	0		Inconclusive
CHEMBL211674	0	0	0		1	0	0	TRUE	0	0	0		0	0	0		0	0	0		Inconclusive
CHEMBL211703	1	0	0	TRUE	1	0	0	TRUE	0	0	0		0	0	0		0	0	0		Active
CHEMBL211839	1	0	0	TRUE	1	0	0	TRUE	0	0	0		1	0	0	TRUE	0	0	0		Active
CHEMBL211963	1	0	0	TRUE	1	0	0	TRUE	0	0	0		0	0	0		0	0	0		Active
CHEMBL212023	0	0	0		1	0	0	TRUE	0	0	0		1	0	0	TRUE	0	0	0		Inconclusive
CHEMBL21241	0	0	0		1	0	0	TRUE	1	1	0	FALSE	1	0	0	TRUE	0	2	0	TRUE	Inconclusive
CHEMBL212512	1	0	0	TRUE	1	0	0	TRUE	0	0	0		0	0	0		0	0	0		Active
CHEMBL212586	1	0	0	TRUE	1	0	0	TRUE	0	0	0		0	0	0		0	0	0		Active
CHEMBL212591	0	0	0		1	0	0	TRUE	0	0	0		1	0	0	TRUE	0	0	0		Inconclusive
CHEMBL212666	0	0	0		0	0	0		0	1	0	TRUE	0	0	0		0	0	0		Inactive
CHEMBL212737	1	0	0	TRUE	1	0	0	TRUE	0	0	0		0	0	0		0	0	0		Active
CHEMBL212808	0	0	0		0	0	0		0	1	0	TRUE	0	0	0		0	0	0		Inactive
CHEMBL212911	0	0	0		2	0	0	TRUE	0	0	0		2	0	0	TRUE	0	0	0		Inconclusive
CHEMBL212993	1	0	0	TRUE	1	0	0	TRUE	0	0	0		0	0	0		0	0	0		Active
CHEMBL213132	0	0	0		0	0	0		0	1	0	TRUE	0	0	0		0	0	0		Inactive
CHEMBL213314	0	0	0		1	0	0	TRUE	0	0	0		1	0	0	TRUE	0	0	0		Inconclusive
CHEMBL213315	0	0	0		1	0	0	TRUE	0	0	0		1	0	0	TRUE	0	0	0		Inconclusive
CHEMBL213355	1	0	0	TRUE	1	0	0	TRUE	0	0	0		0	0	0		0	0	0		Active
CHEMBL213361	0	0	0		1	0	0	TRUE	0	0	0		1	0	0	TRUE	0	0	0		Inconclusive
CHEMBL213410	0	0	0		0	0	0		0	1	0	TRUE	0	0	0		0	0	0		Inactive
CHEMBL213411	0	0	0		0	0	0		0	1	0	TRUE	0	0	0		0	0	0		Inactive
CHEMBL213435	0	0	0		0	0	0		0	1	0	TRUE	0	0	0		0	0	0		Inactive
CHEMBL213487	1	0	0	TRUE	1	0	0	TRUE	0	0	0		1	0	0	TRUE	0	0	0		Active
CHEMBL213524	0	0	0		1	0	0	TRUE	0	0	0		0	0	0		0	0	0		Inconclusive
CHEMBL213547	0	0	0		1	0	0	TRUE	0	0	0		0	0	0		0	0	0		Inconclusive
CHEMBL213602	1	0	0	TRUE	1	0	0	TRUE	0	0	0		1	0	0	TRUE	0	0	0		Active
CHEMBL213675	1	0	0	TRUE	1	0	0	TRUE	0	0	0		1	0	0	TRUE	0	0	0		Active
CHEMBL213678	1	0	0	TRUE	1	0	0	TRUE	0	0	0		1	0	0	TRUE	0	0	0		Active
CHEMBL213876	0	0	0		1	0	0	TRUE	0	0	0		0	0	0		0	0	0		Inconclusive
CHEMBL213877	0	0	0		1	0	0	TRUE	0	0	0		0	0	0		0	0	0		Inconclusive
CHEMBL213902	1	0	0	TRUE	1	0	0	TRUE	0	0	0		1	0	0	TRUE	0	0	0		Active
CHEMBL214026	0	0	0		1	0	0	TRUE	0	0	0		1	0	0	TRUE	0	0	0		Inconclusive
CHEMBL214272	1	0	0	TRUE	1	0	0	TRUE	0	0	0		1	0	0	TRUE	0	0	0		Active
CHEMBL214289	0	0	0		1	0	0	TRUE	0	0	0		0	0	0		0	0	0		Inconclusive
CHEMBL214295	0	0	0		1	0	0	TRUE	0	0	0		0	0	0		0	0	0		Inconclusive
CHEMBL214321	2	0	0	TRUE	0	0	0		0	0	0		0	0	0		0	0	0		Inconclusive
CHEMBL214369	0	0	0		1	0	0	TRUE	0	0	0		0	0	0		0	0	0		Inconclusive
CHEMBL214394	1	0	0	TRUE	1	0	0	TRUE	0	0	0		0	0	0		0	0	0		Active
CHEMBL2146900	0	0	0		0	0	0		0	1	0	TRUE	0	0	0		0	0	0		Inactive
CHEMBL2146901	0	0	0		0	0	0		0	1	0	TRUE	0	0	0		0	0	0		Inactive
CHEMBL214719	3	0	0	TRUE	3	0	0	TRUE	0	1	0	TRUE	0	0	0		0	0	0		Inconclusive
CHEMBL2147415	0	0	0		0	0	0		0	1	0	TRUE	0	0	0		0	0	0		Inactive
CHEMBL2147416	0	0	0		0	0	0		0	1	0	TRUE	0	0	0		0	0	0		Inactive
CHEMBL2147417	0	0	0		0	0	0		0	1	0	TRUE	0	0	0		0	0	0		Inactive
CHEMBL2147418	0	0	0		0	0	0		0	1	0	TRUE	0	0	0		0	0	0		Inactive
CHEMBL2147419	0	0	0		0	0	0		0	1	0	TRUE	0	0	0		0	0	0		Inactive
CHEMBL2147420	0	0	0		0	0	0		0	1	0	TRUE	0	0	0		0	0	0		Inactive
CHEMBL2147421	0	0	0		0	0	0		0	1	0	TRUE	0	0	0		0	0	0		Inactive
CHEMBL2147422	0	0	0		0	0	0		0	1	0	TRUE	0	0	0		0	0	0		Inactive
CHEMBL2147423	0	0	0		0	0	0		0	1	0	TRUE	0	0	0		0	0	0		Inactive
CHEMBL2147424	0	0	0		0	0	0		0	1	0	TRUE	0	0	0		0	0	0		Inactive
CHEMBL214921	0	0	0		1	0	0	TRUE	0	0	0		1	0	0	TRUE	0	0	0		Inconclusive
CHEMBL215126	0	0	0		1	0	0	TRUE	0	0	0		1	0	0	TRUE	0	0	0		Inconclusive
CHEMBL215127	0	0	0		1	0	0	TRUE	0	0	0		1	0	0	TRUE	0	0	0		Inconclusive
CHEMBL215245	0	0	0		1	0	0	TRUE	0	0	0		1	0	0	TRUE	0	0	0		Inconclusive
CHEMBL2153833	0	0	0		0	0	0		1	0	0	TRUE	0	0	0		0	0	0		Inconclusive
CHEMBL2153834	0	0	0		0	0	0		1	0	0	TRUE	0	0	0		0	0	0		Inconclusive
CHEMBL2153835	0	0	0		0	0	0		1	0	0	TRUE	0	0	0		0	0	0		Inconclusive
CHEMBL2153836	0	0	0		0	0	0		1	0	0	TRUE	0	0	0		0	0	0		Inconclusive
CHEMBL2153840	0	0	0		0	0	0		1	0	0	TRUE	0	0	0		0	0	0		Inconclusive
CHEMBL2153842	0	0	0		0	0	0		1	0	0	TRUE	0	0	0		0	0	0		Inconclusive
CHEMBL2153843	0	0	0		0	0	0		1	0	0	TRUE	0	0	0		0	0	0		Inconclusive
CHEMBL2153849	1	0	0	TRUE	0	0	0		0	0	0		0	0	0		0	0	0		Inconclusive
CHEMBL2153850	1	0	0	TRUE	0	0	0		0	0	0		0	0	0		0	0	0		Inconclusive
CHEMBL2153851	1	0	0	TRUE	0	0	0		0	0	0		0	0	0		0	0	0		Inconclusive
CHEMBL2153852	1	0	0	TRUE	0	0	0		0	0	0		0	0	0		0	0	0		Inconclusive
CHEMBL2153853	1	0	0	TRUE	0	0	0		0	0	0		0	0	0		0	0	0		Inconclusive
CHEMBL2153854	1	0	0	TRUE	0	0	0		0	0	0		0	0	0		0	0	0		Inconclusive
CHEMBL2153855	1	0	0	TRUE	0	0	0		0	0	0		0	0	0		0	0	0		Inconclusive
CHEMBL2153856	1	0	0	TRUE	0	0	0		0	0	0		0	0	0		0	0	0		Inconclusive
CHEMBL2153857	1	0	0	TRUE	0	0	0		0	0	0		0	0	0		0	0	0		Inconclusive
CHEMBL2153858	1	0	0	TRUE	0	0	0		0	0	0		0	0	0		0	0	0		Inconclusive
CHEMBL2153859	1	0	0	TRUE	0	0	0		0	0	0		0	0	0		0	0	0		Inconclusive
CHEMBL2153860	1	0	0	TRUE	0	0	0		0	0	0		0	0	0		0	0	0		Inconclusive
CHEMBL2153861	1	0	0	TRUE	0	0	0		0	0	0		0	0	0		0	0	0		Inconclusive
CHEMBL2153862	1	0	0	TRUE	0	0	0		0	0	0		0	0	0		0	0	0		Inconclusive
CHEMBL215582	0	0	0		1	0	0	TRUE	0	0	0		1	0	0	TRUE	0	0	0		Inconclusive
CHEMBL215605	0	0	0		1	0	0	TRUE	0	0	0		0	0	0		0	0	0		Inconclusive
CHEMBL215701	0	0	0		1	0	0	TRUE	0	0	0		1	0	0	TRUE	0	0	0		Inconclusive
CHEMBL2158012	0	0	0		2	0	0	TRUE	0	0	0		0	0	0		0	0	0		Inconclusive
CHEMBL215812	0	0	0		1	0	0	TRUE	0	0	0		0	0	0		0	0	0		Inconclusive
CHEMBL2158959	0	0	0		2	0	0	TRUE	0	0	0		0	0	0		0	0	0		Inconclusive
CHEMBL2158960	0	0	0		2	0	0	TRUE	0	0	0		0	0	0		0	0	0		Inconclusive
CHEMBL2158961	0	0	0		2	0	0	TRUE	0	0	0		0	0	0		0	0	0		Inconclusive
CHEMBL2159605	0	0	0		0	0	1	TRUE	0	0	0		0	0	0		0	0	0		Inconclusive
CHEMBL2159606	1	0	0	TRUE	0	0	1	TRUE	0	0	0		0	0	0		0	0	0		Inconclusive
CHEMBL2159607	0	0	0		0	0	1	TRUE	0	0	0		0	0	0		0	0	0		Inconclusive
CHEMBL216395	0	0	0		1	0	0	TRUE	1	0	0	TRUE	0	0	0		0	0	0		Inconclusive
CHEMBL21706	0	0	0		1	0	0	TRUE	0	0	0		0	0	0		0	0	0		Inconclusive
CHEMBL217118	1	0	0	TRUE	1	0	0	TRUE	0	0	0		0	0	0		0	0	0		Active
CHEMBL2171621	0	0	1	TRUE	0	0	0		0	0	0		0	0	0		0	0	0		Inconclusive
CHEMBL2171912	1	0	0	TRUE	0	0	0		0	0	0		0	0	0		0	0	0		Inconclusive
CHEMBL2178583	0	0	0		1	0	0	TRUE	1	0	1	FALSE	0	0	0		0	0	0		Inconclusive
CHEMBL2178586	0	0	0		1	0	0	TRUE	1	0	1	FALSE	0	0	0		1	0	0	TRUE	Inconclusive
CHEMBL2178591	0	0	0		0	0	0		0	1	0	TRUE	0	0	0		0	1	0	TRUE	Inactive
CHEMBL2178592	0	0	0		0	0	0		0	1	0	TRUE	0	0	0		0	1	0	TRUE	Inactive
CHEMBL2178596	0	0	0		1	0	0	TRUE	1	0	1	FALSE	0	0	0		2	0	0	TRUE	Inconclusive
CHEMBL217907	1	0	0	TRUE	1	0	0	TRUE	0	0	0		1	0	0	TRUE	0	0	0		Active
CHEMBL217932	0	0	0		1	0	0	TRUE	0	0	0		0	0	0		0	0	0		Inconclusive
CHEMBL2180619	0	0	0		0	0	0		0	1	0	TRUE	0	0	0		0	0	0		Inactive
CHEMBL2180620	1	0	0	TRUE	0	0	0		0	0	0		0	0	0		0	0	0		Inconclusive
CHEMBL2180621	1	0	0	TRUE	0	0	0		0	0	0		0	0	0		0	0	0		Inconclusive
CHEMBL2180622	0	0	0		0	0	0		0	1	0	TRUE	0	0	0		0	0	0		Inactive
CHEMBL2180623	0	0	0		0	0	0		0	1	0	TRUE	0	0	0		0	0	0		Inactive
CHEMBL2180624	0	0	0		0	0	0		0	1	0	TRUE	0	0	0		0	0	0		Inactive
CHEMBL2180625	0	0	0		0	0	0		0	1	0	TRUE	0	0	0		0	0	0		Inactive
CHEMBL2180626	0	0	0		0	0	0		0	1	0	TRUE	0	0	0		0	0	0		Inactive
CHEMBL2180627	0	0	0		0	0	0		0	1	0	TRUE	0	0	0		0	0	0		Inactive
CHEMBL2180628	0	0	0		0	0	0		0	1	0	TRUE	0	0	0		0	0	0		Inactive
CHEMBL2180629	0	0	0		0	0	0		0	1	0	TRUE	0	0	0		0	0	0		Inactive
CHEMBL2180630	0	0	0		0	0	0		0	1	0	TRUE	0	0	0		0	0	0		Inactive
CHEMBL2180631	2	0	0	TRUE	1	0	0	TRUE	0	0	0		0	0	0		0	0	0		Active
CHEMBL2180632	1	0	0	TRUE	0	0	0		0	0	0		0	0	0		0	0	0		Inconclusive
CHEMBL2180633	1	0	0	TRUE	0	0	0		0	0	0		0	0	0		0	0	0		Inconclusive
CHEMBL2180634	2	0	0	TRUE	1	0	0	TRUE	0	0	0		0	0	0		0	0	0		Active
CHEMBL2180635	1	0	0	TRUE	0	0	0		0	0	0		0	0	0		0	0	0		Inconclusive
CHEMBL2180636	1	0	0	TRUE	0	0	0		0	0	0		0	0	0		0	0	0		Inconclusive
CHEMBL218094	0	0	0		1	0	0	TRUE	0	0	0		0	0	0		0	0	0		Inconclusive
CHEMBL218101	0	0	0		1	0	0	TRUE	0	0	0		0	0	0		0	0	0		Inconclusive
CHEMBL218117	1	0	0	TRUE	1	0	0	TRUE	0	0	0		1	0	0	TRUE	0	0	0		Active
CHEMBL218338	0	0	0		1	0	0	TRUE	0	0	0		0	0	0		0	0	0		Inconclusive
CHEMBL218339	0	0	0		1	0	0	TRUE	0	0	0		0	0	0		0	0	0		Inconclusive
CHEMBL218384	0	0	0		1	0	0	TRUE	0	0	0		0	0	0		0	0	0		Inconclusive
CHEMBL218442	0	0	0		1	0	0	TRUE	0	0	0		0	0	0		0	0	0		Inconclusive
CHEMBL218487	1	0	0	TRUE	1	0	0	TRUE	0	0	0		1	0	0	TRUE	0	0	0		Active
CHEMBL218497	0	0	0		1	0	0	TRUE	0	0	0		0	0	0		0	0	0		Inconclusive
CHEMBL218591	0	0	1	TRUE	1	0	0	TRUE	0	0	0		0	0	1	TRUE	0	0	0		Inconclusive
CHEMBL218637	0	0	0		1	0	0	TRUE	0	0	0		0	0	0		0	0	0		Inconclusive
CHEMBL218687	1	0	0	TRUE	1	0	0	TRUE	0	0	0		0	0	0		0	0	0		Active
CHEMBL218691	0	0	0		1	0	0	TRUE	0	0	0		0	0	0		0	0	0		Inconclusive
CHEMBL218784	0	0	0		1	0	0	TRUE	0	0	0		0	0	0		0	0	0		Inconclusive
CHEMBL218950	1	0	0	TRUE	1	0	0	TRUE	0	0	0		0	0	1	TRUE	0	0	0		Active
CHEMBL219005	1	0	0	TRUE	1	0	0	TRUE	0	0	0		1	0	0	TRUE	0	0	0		Active
CHEMBL219586	1	0	0	TRUE	5	0	0	TRUE	0	0	0		0	0	0		0	0	0		Active
CHEMBL219587	0	0	0		1	0	0	TRUE	0	0	0		0	0	0		0	0	0		Inconclusive
CHEMBL219626	0	0	0		1	0	0	TRUE	0	0	0		0	0	0		0	0	0		Inconclusive
CHEMBL219773	1	0	0	TRUE	1	0	0	TRUE	0	0	0		1	0	0	TRUE	0	0	0		Active
CHEMBL219824	1	0	0	TRUE	1	0	0	TRUE	0	0	0		1	0	0	TRUE	0	0	0		Active
CHEMBL219836	1	0	0	TRUE	0	0	0		0	0	0		2	0	0	TRUE	0	0	0		Active
CHEMBL220281	0	0	0		1	0	0	TRUE	0	0	0		0	0	0		0	0	0		Inconclusive
CHEMBL2203301	0	0	1	TRUE	0	0	1	TRUE	0	0	0		0	0	0		0	0	0		Inconclusive
CHEMBL2204435	0	0	0		0	0	0		0	1	0	TRUE	0	0	0		0	0	0		Inactive
CHEMBL2204593	0	0	0		1	0	0	TRUE	0	0	0		0	0	0		0	0	0		Inconclusive
CHEMBL2204594	0	0	0		1	0	0	TRUE	0	0	0		0	0	0		0	0	0		Inconclusive
CHEMBL2204595	0	0	0		1	0	0	TRUE	0	0	0		0	0	0		0	0	0		Inconclusive
CHEMBL2204596	0	0	0		1	0	0	TRUE	0	0	0		0	0	0		0	0	0		Inconclusive
CHEMBL2204597	0	0	0		1	0	0	TRUE	0	0	0		0	0	0		0	0	0		Inconclusive
CHEMBL2204598	0	0	0		1	0	0	TRUE	0	0	0		0	0	0		0	0	0		Inconclusive
CHEMBL2204599	0	0	0		1	0	0	TRUE	0	0	0		0	0	0		0	0	0		Inconclusive
CHEMBL2204600	0	0	0		1	0	0	TRUE	0	0	0		0	0	0		0	0	0		Inconclusive
CHEMBL2204601	0	0	0		0	0	1	TRUE	0	0	0		0	0	0		0	0	0		Inconclusive
CHEMBL2204602	0	0	0		1	0	0	TRUE	0	0	0		0	0	0		0	0	0		Inconclusive
CHEMBL2204603	0	0	0		1	0	0	TRUE	0	0	0		0	0	0		0	0	0		Inconclusive
CHEMBL2204604	0	0	0		1	0	0	TRUE	0	0	0		0	0	0		0	0	0		Inconclusive
CHEMBL2204605	0	0	0		1	0	0	TRUE	0	0	0		0	0	0		0	0	0		Inconclusive
CHEMBL2204606	0	0	0		0	0	1	TRUE	0	0	0		0	0	0		0	0	0		Inconclusive
CHEMBL2204607	0	0	0		0	0	1	TRUE	0	0	0		0	0	0		0	0	0		Inconclusive
CHEMBL2204608	0	0	0		1	0	0	TRUE	0	0	0		0	0	0		0	0	0		Inconclusive
CHEMBL2204609	0	0	0		0	0	1	TRUE	0	0	0		0	0	0		0	0	0		Inconclusive
CHEMBL2204610	0	0	0		1	0	0	TRUE	0	0	0		0	0	0		0	0	0		Inconclusive
CHEMBL2204683	1	0	0	TRUE	1	0	0	TRUE	0	0	0		0	0	0		0	0	0		Active
CHEMBL2204684	0	0	0		0	0	0		0	1	0	TRUE	0	0	0		0	0	0		Inactive
CHEMBL2204685	0	0	0		0	0	0		0	1	0	TRUE	0	0	0		0	0	0		Inactive
CHEMBL2204686	1	0	0	TRUE	1	0	0	TRUE	0	0	0		0	0	0		0	0	0		Active
CHEMBL2204687	1	0	0	TRUE	0	0	1	TRUE	0	0	0		0	0	0		0	0	0		Inconclusive
CHEMBL2204688	1	0	0	TRUE	1	0	0	TRUE	0	0	0		0	0	0		0	0	0		Active
CHEMBL2204689	1	0	0	TRUE	1	0	0	TRUE	0	0	0		0	0	0		0	0	0		Active
CHEMBL2204690	1	0	0	TRUE	1	0	0	TRUE	0	0	0		0	0	0		0	0	0		Active
CHEMBL2204691	0	0	1	TRUE	0	0	1	TRUE	0	0	0		0	0	0		0	0	0		Inconclusive
CHEMBL2204692	1	0	0	TRUE	1	0	0	TRUE	0	0	0		0	0	0		0	0	0		Active
CHEMBL2204693	1	0	0	TRUE	0	0	1	TRUE	0	0	0		0	0	0		0	0	0		Inconclusive
CHEMBL2204694	1	0	0	TRUE	1	0	0	TRUE	0	0	0		0	0	0		0	0	0		Active
CHEMBL2204695	1	0	0	TRUE	0	0	1	TRUE	0	0	0		0	0	0		0	0	0		Inconclusive
CHEMBL2204696	1	0	0	TRUE	1	0	0	TRUE	0	0	0		0	0	0		0	0	0		Active
CHEMBL2204697	1	0	0	TRUE	1	0	0	TRUE	0	0	0		0	0	0		0	0	0		Active
CHEMBL2204698	1	0	0	TRUE	0	0	1	TRUE	0	0	0		0	0	0		0	0	0		Inconclusive
CHEMBL2204699	0	0	1	TRUE	0	0	1	TRUE	0	0	0		0	0	0		0	0	0		Inconclusive
CHEMBL2204700	0	0	0		0	0	0		0	1	0	TRUE	0	0	0		0	0	0		Inactive
CHEMBL2204701	1	0	0	TRUE	1	0	0	TRUE	0	0	0		0	0	0		0	0	0		Active
CHEMBL2204702	1	0	0	TRUE	1	0	0	TRUE	0	0	0		0	0	0		0	0	0		Active
CHEMBL220533	1	0	0	TRUE	1	0	0	TRUE	0	0	0		1	0	0	TRUE	0	0	0		Active
CHEMBL220597	1	0	0	TRUE	1	0	0	TRUE	0	0	0		1	0	0	TRUE	0	0	0		Active
CHEMBL220622	2	0	0	TRUE	1	0	0	TRUE	0	0	0		3	0	0	TRUE	0	0	0		Active
CHEMBL2206302	1	0	0	TRUE	1	0	0	TRUE	0	0	0		1	0	0	TRUE	0	0	0		Active
CHEMBL2206303	1	0	0	TRUE	1	0	0	TRUE	0	0	0		1	0	0	TRUE	0	0	0		Active
CHEMBL2206304	1	0	0	TRUE	1	0	0	TRUE	0	0	0		1	0	0	TRUE	0	0	0		Active
CHEMBL2206305	1	0	0	TRUE	1	0	0	TRUE	0	0	0		0	0	0		0	0	0		Active
CHEMBL2206306	1	0	0	TRUE	1	0	0	TRUE	0	0	0		0	0	0		0	0	0		Active
CHEMBL220655	1	0	0	TRUE	1	0	0	TRUE	0	0	0		1	0	0	TRUE	0	0	0		Active
CHEMBL220708	1	0	0	TRUE	1	0	0	TRUE	0	0	0		1	0	0	TRUE	0	0	0		Active
CHEMBL220751	0	0	0		1	0	0	TRUE	0	0	0		0	0	0		0	0	0		Inconclusive
CHEMBL220817	0	0	0		1	0	0	TRUE	0	0	0		0	0	0		0	0	0		Inconclusive
CHEMBL2208195	0	0	0		0	0	0		2	0	0	TRUE	0	0	0		0	0	0		Inconclusive
CHEMBL2208196	0	0	0		0	0	0		2	0	0	TRUE	0	0	0		0	0	0		Inconclusive
CHEMBL2208197	0	0	0		0	0	0		2	0	0	TRUE	0	0	0		0	0	0		Inconclusive
CHEMBL220926	0	0	0		1	0	0	TRUE	0	0	0		0	0	0		0	0	0		Inconclusive
CHEMBL221074	1	0	0	TRUE	2	0	0	TRUE	0	0	0		0	0	0		0	0	0		Active
CHEMBL221123	1	0	0	TRUE	1	0	0	TRUE	0	0	0		1	0	0	TRUE	0	0	0		Active
CHEMBL221146	0	0	0		1	0	0	TRUE	0	0	0		0	0	0		0	0	0		Inconclusive
CHEMBL221184	1	0	0	TRUE	1	0	0	TRUE	0	0	0		1	0	0	TRUE	0	0	0		Active
CHEMBL221201	0	0	0		1	0	0	TRUE	0	0	0		0	0	0		0	0	0		Inconclusive
CHEMBL221254	0	0	0		1	0	0	TRUE	0	0	0		0	0	0		0	0	0		Inconclusive
CHEMBL221292	0	0	0		1	0	0	TRUE	0	0	0		0	0	0		0	0	0		Inconclusive
CHEMBL221388	1	0	0	TRUE	1	0	0	TRUE	0	0	0		1	0	0	TRUE	0	0	0		Active
CHEMBL221399	1	0	0	TRUE	1	0	0	TRUE	0	0	0		0	0	0		0	0	0		Active
CHEMBL221438	1	0	0	TRUE	1	0	0	TRUE	0	0	0		1	0	0	TRUE	0	0	0		Active
CHEMBL221474	1	0	0	TRUE	1	0	0	TRUE	0	0	0		1	0	0	TRUE	0	0	0		Active
CHEMBL221489	1	0	0	TRUE	1	0	0	TRUE	0	0	0		1	0	0	TRUE	0	0	0		Active
CHEMBL221490	1	0	0	TRUE	1	0	0	TRUE	0	0	0		1	0	0	TRUE	0	0	0		Active
CHEMBL221529	1	0	0	TRUE	1	0	0	TRUE	0	0	0		1	0	0	TRUE	0	0	0		Active
CHEMBL221641	1	0	0	TRUE	1	0	0	TRUE	0	0	0		1	0	0	TRUE	0	0	0		Active
CHEMBL221649	1	0	0	TRUE	1	0	0	TRUE	0	0	0		1	0	0	TRUE	0	0	0		Active
CHEMBL221755	1	0	0	TRUE	1	0	0	TRUE	0	0	0		0	0	0		0	0	0		Active
CHEMBL221850	1	0	0	TRUE	1	0	0	TRUE	0	0	0		1	0	0	TRUE	0	0	0		Active
CHEMBL222107	1	0	0	TRUE	1	0	0	TRUE	0	0	0		1	0	0	TRUE	0	0	0		Active
CHEMBL222117	1	0	0	TRUE	1	0	0	TRUE	0	0	0		1	0	0	TRUE	0	0	0		Active
CHEMBL222121	1	0	0	TRUE	1	0	0	TRUE	0	0	0		1	0	0	TRUE	0	0	0		Active
CHEMBL222556	2	0	0	TRUE	0	0	0		0	0	0		0	0	0		0	0	0		Inconclusive
CHEMBL222560	1	0	0	TRUE	1	0	0	TRUE	0	0	0		0	0	0		0	0	0		Active
CHEMBL222561	0	0	1	TRUE	0	0	0		0	0	0		0	0	0		0	0	0		Inconclusive
CHEMBL222880	1	0	0	TRUE	1	0	0	TRUE	0	0	0		0	0	0		0	0	0		Active
CHEMBL223080	0	0	1	TRUE	0	0	0		0	0	0		0	0	0		0	0	0		Inconclusive
CHEMBL223128	1	0	0	TRUE	1	0	0	TRUE	0	0	0		1	0	0	TRUE	0	0	0		Active
CHEMBL223349	1	0	0	TRUE	1	0	0	TRUE	0	0	0		1	0	0	TRUE	0	0	0		Active
CHEMBL223350	1	0	0	TRUE	1	0	0	TRUE	0	0	0		1	0	0	TRUE	0	0	0		Active
CHEMBL223351	1	0	0	TRUE	1	0	0	TRUE	0	0	0		1	0	0	TRUE	0	0	0		Active
CHEMBL223379	1	0	0	TRUE	1	0	0	TRUE	0	0	0		1	0	0	TRUE	0	0	0		Active
CHEMBL223434	1	0	0	TRUE	0	0	0		0	0	0		2	0	0	TRUE	0	0	0		Active
CHEMBL2237300	0	0	0		2	0	0	TRUE	0	0	0		0	0	0		0	0	0		Inconclusive
CHEMBL225017	0	0	1	TRUE	0	0	0		0	0	0		0	0	0		0	0	0		Inconclusive
CHEMBL225828	1	0	0	TRUE	1	0	0	TRUE	0	0	0		0	0	0		0	0	0		Active
CHEMBL225936	1	0	0	TRUE	1	0	0	TRUE	0	0	0		0	0	0		0	0	0		Active
CHEMBL2260190	0	0	1	TRUE	0	0	0		0	0	0		0	0	0		0	0	0		Inconclusive
CHEMBL2260191	0	0	1	TRUE	0	0	0		0	0	0		0	0	0		0	0	0		Inconclusive
CHEMBL2260192	0	0	1	TRUE	0	0	0		0	0	0		0	0	0		0	0	0		Inconclusive
CHEMBL2260193	0	0	1	TRUE	0	0	0		0	0	0		0	0	0		0	0	0		Inconclusive
CHEMBL2260194	0	0	1	TRUE	0	0	0		0	0	0		0	0	0		0	0	0		Inconclusive
CHEMBL2260195	0	0	1	TRUE	0	0	0		0	0	0		0	0	0		0	0	0		Inconclusive
CHEMBL2260196	0	1	0	TRUE	0	0	0		0	0	0		0	0	0		0	0	0		Inactive
CHEMBL2260197	0	0	1	TRUE	0	0	0		0	0	0		0	0	0		0	0	0		Inconclusive
CHEMBL2260198	0	0	1	TRUE	0	0	0		0	0	0		0	0	0		0	0	0		Inconclusive
CHEMBL2260199	0	0	0		0	0	0		0	1	0	TRUE	0	0	0		0	0	0		Inactive
CHEMBL2260200	0	0	1	TRUE	0	0	0		0	0	0		0	0	0		0	0	0		Inconclusive
CHEMBL2282517	0	0	0		2	0	0	TRUE	0	0	0		0	0	0		0	0	0		Inconclusive
CHEMBL2282518	0	0	0		2	0	0	TRUE	0	0	0		0	0	0		0	0	0		Inconclusive
CHEMBL2282519	0	0	0		2	0	0	TRUE	0	0	0		0	0	0		0	0	0		Inconclusive
CHEMBL2282520	0	0	0		2	0	0	TRUE	0	0	0		0	0	0		0	0	0		Inconclusive
CHEMBL2282521	0	0	0		2	0	0	TRUE	0	0	0		0	0	0		0	0	0		Inconclusive
CHEMBL2282522	0	0	0		2	0	0	TRUE	0	0	0		0	0	0		0	0	0		Inconclusive
CHEMBL2282523	0	0	0		2	0	0	TRUE	0	0	0		0	0	0		0	0	0		Inconclusive
CHEMBL228266	0	1	0	TRUE	0	0	0		0	0	0		0	0	0		0	0	0		Inactive
CHEMBL228375	0	1	0	TRUE	0	0	0		0	0	0		0	0	0		0	0	0		Inactive
CHEMBL228376	0	1	0	TRUE	0	0	0		0	0	0		0	0	0		0	0	0		Inactive
CHEMBL228377	0	1	0	TRUE	0	0	0		0	0	0		0	0	0		0	0	0		Inactive
CHEMBL228432	1	0	0	TRUE	0	0	0		0	0	0		0	0	0		0	0	0		Inconclusive
CHEMBL228433	0	1	0	TRUE	0	0	0		0	0	0		0	0	0		0	0	0		Inactive
CHEMBL228434	0	0	1	TRUE	0	0	0		0	0	0		0	0	0		0	0	0		Inconclusive
CHEMBL228483	0	0	1	TRUE	0	0	0		0	0	0		0	0	0		0	0	0		Inconclusive
CHEMBL228484	1	0	0	TRUE	0	0	0		0	0	0		0	0	0		0	0	0		Inconclusive
CHEMBL229071	1	0	0	TRUE	0	0	0		0	0	0		0	0	0		0	0	0		Inconclusive
CHEMBL229525	0	0	0		1	0	0	TRUE	0	0	0		0	0	0		0	0	0		Inconclusive
CHEMBL229573	0	0	0		1	0	0	TRUE	0	0	0		0	0	0		0	0	0		Inconclusive
CHEMBL229778	0	0	0		1	0	0	TRUE	0	0	0		0	0	0		0	0	0		Inconclusive
CHEMBL229785	0	0	0		1	0	0	TRUE	0	0	0		0	0	0		0	0	0		Inconclusive
CHEMBL229786	0	0	0		1	0	0	TRUE	0	0	0		0	0	0		0	0	0		Inconclusive
CHEMBL229831	0	0	0		1	0	0	TRUE	0	0	0		0	0	0		0	0	0		Inconclusive
CHEMBL229836	0	0	0		1	0	0	TRUE	0	0	0		0	0	0		0	0	0		Inconclusive
CHEMBL229837	0	0	0		1	0	0	TRUE	0	0	0		0	0	0		0	0	0		Inconclusive
CHEMBL229888	0	0	0		1	0	0	TRUE	0	0	0		0	0	0		0	0	0		Inconclusive
CHEMBL230006	0	0	0		0	0	0		0	0	1	TRUE	0	0	0		0	0	0		Inconclusive
CHEMBL230050	0	0	0		1	0	0	TRUE	0	0	0		0	0	0		0	0	0		Inconclusive
CHEMBL230063	0	0	0		1	0	0	TRUE	0	0	0		0	0	0		0	0	0		Inconclusive
CHEMBL230158	0	0	0		1	0	0	TRUE	0	0	0		0	0	0		0	0	0		Inconclusive
CHEMBL230177	0	0	0		1	0	0	TRUE	0	0	0		0	0	0		0	0	0		Inconclusive
CHEMBL230179	0	0	0		1	0	0	TRUE	0	0	0		0	0	0		0	0	0		Inconclusive
CHEMBL230259	1	0	0	TRUE	1	0	0	TRUE	0	0	0		1	0	0	TRUE	0	0	0		Active
CHEMBL230268	0	0	0		1	0	0	TRUE	0	0	0		0	0	0		0	0	0		Inconclusive
CHEMBL230269	0	0	0		1	0	0	TRUE	0	0	0		0	0	0		0	0	0		Inconclusive
CHEMBL230287	0	0	0		1	0	0	TRUE	0	0	0		0	0	0		0	0	0		Inconclusive
CHEMBL230304	0	0	0		1	0	0	TRUE	0	0	0		0	0	0		0	0	0		Inconclusive
CHEMBL230305	0	0	0		1	0	0	TRUE	0	0	0		0	0	0		0	0	0		Inconclusive
CHEMBL230372	0	0	0		1	0	0	TRUE	0	0	0		0	0	0		0	0	0		Inconclusive
CHEMBL230409	0	0	0		1	0	0	TRUE	0	0	0		0	0	0		0	0	0		Inconclusive
CHEMBL230410	0	0	0		1	0	0	TRUE	0	0	0		0	0	0		0	0	0		Inconclusive
CHEMBL230411	0	0	0		1	0	0	TRUE	0	0	0		0	0	0		0	0	0		Inconclusive
CHEMBL230517	0	0	0		1	0	0	TRUE	0	0	0		0	0	0		0	0	0		Inconclusive
CHEMBL230518	0	0	0		1	0	0	TRUE	0	0	0		0	0	0		0	0	0		Inconclusive
CHEMBL230519	0	0	0		1	0	0	TRUE	0	0	0		0	0	0		0	0	0		Inconclusive
CHEMBL230605	0	0	0		1	0	0	TRUE	0	0	0		0	0	0		0	0	0		Inconclusive
CHEMBL230622	0	0	0		1	0	0	TRUE	0	0	0		0	0	0		0	0	0		Inconclusive
CHEMBL230623	0	0	0		1	0	0	TRUE	0	0	0		0	0	0		0	0	0		Inconclusive
CHEMBL230705	0	0	0		1	0	0	TRUE	0	0	0		0	0	0		0	0	0		Inconclusive
CHEMBL230706	0	0	0		1	0	0	TRUE	0	0	0		0	0	0		0	0	0		Inconclusive
CHEMBL230707	0	0	0		1	0	0	TRUE	0	0	0		0	0	0		0	0	0		Inconclusive
CHEMBL230731	1	0	0	TRUE	1	0	0	TRUE	0	0	0		1	0	0	TRUE	0	0	0		Active
CHEMBL230804	0	0	0		1	0	0	TRUE	0	0	0		1	0	0	TRUE	0	0	0		Inconclusive
CHEMBL230814	0	0	0		1	0	0	TRUE	0	0	0		0	0	0		0	0	0		Inconclusive
CHEMBL231223	0	0	0		1	0	0	TRUE	0	0	0		0	0	0		0	0	0		Inconclusive
CHEMBL2312700	1	0	0	TRUE	1	0	0	TRUE	0	0	0		0	0	0		0	0	0		Active
CHEMBL2312701	1	0	0	TRUE	1	0	0	TRUE	0	0	0		0	0	0		0	0	0		Active
CHEMBL2312702	1	0	0	TRUE	1	0	0	TRUE	0	0	0		3	0	0	TRUE	0	0	0		Active
CHEMBL2312703	1	0	0	TRUE	0	0	0		1	0	0	TRUE	2	0	0	TRUE	0	0	0		Active
CHEMBL2312704	0	0	1	TRUE	0	0	0		1	0	0	TRUE	0	0	0		0	0	0		Inconclusive
CHEMBL2312705	1	0	0	TRUE	0	0	0		1	0	0	TRUE	0	0	0		0	0	0		Inconclusive
CHEMBL2312706	0	0	1	TRUE	0	0	0		1	0	0	TRUE	0	0	0		0	0	0		Inconclusive
CHEMBL2312707	1	0	0	TRUE	1	0	0	TRUE	0	0	0		0	0	0		0	0	0		Active
CHEMBL2312708	1	0	0	TRUE	1	0	0	TRUE	0	0	0		0	0	0		0	0	0		Active
CHEMBL2312709	1	0	0	TRUE	1	0	0	TRUE	0	0	0		0	0	0		0	0	0		Active
CHEMBL2312710	1	0	0	TRUE	1	0	0	TRUE	0	0	0		0	0	0		0	0	0		Active
CHEMBL2312711	1	0	0	TRUE	1	0	0	TRUE	0	0	0		0	0	0		0	0	0		Active
CHEMBL2312712	1	0	0	TRUE	1	0	0	TRUE	0	0	0		0	0	0		0	0	0		Active
CHEMBL2312713	1	0	0	TRUE	1	0	0	TRUE	0	0	0		0	0	0		0	0	0		Active
CHEMBL2312714	1	0	0	TRUE	1	0	0	TRUE	0	0	0		0	0	0		0	0	0		Active
CHEMBL2312715	1	0	0	TRUE	1	0	0	TRUE	0	0	0		0	0	0		0	0	0		Active
CHEMBL2312716	1	0	0	TRUE	1	0	0	TRUE	0	0	0		0	0	0		0	0	0		Active
CHEMBL2312717	1	0	0	TRUE	1	0	0	TRUE	0	0	0		0	0	0		0	0	0		Active
CHEMBL2312718	1	0	0	TRUE	1	0	0	TRUE	0	0	0		0	0	0		0	0	0		Active
CHEMBL231425	0	0	0		1	0	0	TRUE	0	0	0		0	0	0		0	0	0		Inconclusive
CHEMBL231428	0	0	0		2	0	0	TRUE	0	0	0		0	0	0		0	0	0		Inconclusive
CHEMBL231523	0	0	0		1	0	0	TRUE	0	0	0		0	0	0		0	0	0		Inconclusive
CHEMBL231527	0	0	0		1	0	0	TRUE	0	0	0		0	0	0		0	0	0		Inconclusive
CHEMBL231528	0	0	0		1	0	0	TRUE	0	0	0		0	0	0		0	0	0		Inconclusive
CHEMBL231531	0	0	0		1	0	0	TRUE	0	0	0		0	0	0		0	0	0		Inconclusive
CHEMBL2315528	0	0	0		1	0	0	TRUE	0	0	0		0	0	0		0	0	0		Inconclusive
CHEMBL231696	1	0	0	TRUE	1	0	0	TRUE	0	0	0		0	0	0		0	0	0		Active
CHEMBL2322172	1	0	0	TRUE	1	0	0	TRUE	0	0	0		0	0	0		0	0	0		Active
CHEMBL2322173	0	0	0		0	0	1	TRUE	0	0	0		0	0	0		0	0	0		Inconclusive
CHEMBL2322174	1	0	0	TRUE	1	0	0	TRUE	0	0	0		0	0	0		0	0	0		Active
CHEMBL2322175	1	0	0	TRUE	1	0	0	TRUE	0	0	0		0	0	0		0	0	0		Active
CHEMBL2322176	1	0	0	TRUE	1	0	0	TRUE	0	0	0		0	0	0		0	0	0		Active
CHEMBL2322177	0	0	0		0	0	1	TRUE	0	0	0		0	0	0		0	0	0		Inconclusive
CHEMBL2322437	1	0	0	TRUE	1	0	0	TRUE	0	0	0		0	0	0		0	0	0		Active
CHEMBL2322438	0	0	0		0	0	1	TRUE	0	0	0		0	0	0		0	0	0		Inconclusive
CHEMBL2322439	1	0	0	TRUE	1	0	0	TRUE	0	0	0		0	0	0		0	0	0		Active
CHEMBL2322440	0	0	0		0	0	1	TRUE	0	0	0		0	0	0		0	0	0		Inconclusive
CHEMBL2322441	1	0	0	TRUE	1	0	0	TRUE	0	0	0		0	0	0		0	0	0		Active
CHEMBL2322442	1	0	0	TRUE	1	0	0	TRUE	0	0	0		0	0	0		0	0	0		Active
CHEMBL2322443	1	0	0	TRUE	1	0	0	TRUE	0	0	0		0	0	0		0	0	0		Active
CHEMBL2322444	1	0	0	TRUE	1	0	0	TRUE	0	0	0		0	0	0		0	0	0		Active
CHEMBL2322445	1	0	0	TRUE	1	0	0	TRUE	0	0	0		0	0	0		0	0	0		Active
CHEMBL2322446	1	0	0	TRUE	1	0	0	TRUE	0	0	0		0	0	0		0	0	0		Active
CHEMBL2322447	1	0	0	TRUE	1	0	0	TRUE	0	0	0		0	0	0		0	0	0		Active
CHEMBL2322448	1	0	0	TRUE	1	0	0	TRUE	0	0	0		0	0	0		0	0	0		Active
CHEMBL2322449	1	0	0	TRUE	1	0	0	TRUE	0	0	0		0	0	0		0	0	0		Active
CHEMBL2322450	1	0	0	TRUE	1	0	0	TRUE	0	0	0		0	0	0		0	0	0		Active
CHEMBL2322451	1	0	0	TRUE	1	0	0	TRUE	0	0	0		0	0	0		0	0	0		Active
CHEMBL232597	0	0	0		2	0	0	TRUE	0	0	0		0	0	0		0	0	0		Inconclusive
CHEMBL232798	1	0	0	TRUE	1	0	0	TRUE	0	0	0		0	0	0		0	0	0		Active
CHEMBL232799	1	0	0	TRUE	1	0	0	TRUE	0	0	0		0	0	0		0	0	0		Active
CHEMBL23296	0	0	0		1	0	0	TRUE	0	0	0		3	0	0	TRUE	0	0	0		Inconclusive
CHEMBL233003	1	0	0	TRUE	1	0	0	TRUE	0	0	0		0	0	0		0	0	0		Active
CHEMBL2331559	1	0	0	TRUE	1	0	0	TRUE	0	0	0		1	0	0	TRUE	0	0	0		Active
CHEMBL2331770	0	1	0	TRUE	0	0	1	TRUE	0	0	0		1	0	0	TRUE	0	0	0		Inconclusive
CHEMBL2331771	1	0	0	TRUE	1	0	0	TRUE	0	0	0		1	0	0	TRUE	0	0	0		Active
CHEMBL2331772	1	0	0	TRUE	1	0	0	TRUE	0	0	0		1	0	0	TRUE	0	0	0		Active
CHEMBL2331773	1	0	0	TRUE	1	0	0	TRUE	0	0	0		1	0	0	TRUE	0	0	0		Active
CHEMBL2331774	1	0	0	TRUE	1	0	0	TRUE	0	0	0		1	0	0	TRUE	0	0	0		Active
CHEMBL2331775	1	0	0	TRUE	1	0	0	TRUE	0	0	0		1	0	0	TRUE	0	0	0		Active
CHEMBL2331777	1	0	0	TRUE	1	0	0	TRUE	0	0	0		1	0	0	TRUE	0	0	0		Active
CHEMBL2331778	1	0	0	TRUE	1	0	0	TRUE	0	0	0		1	0	0	TRUE	0	0	0		Active
CHEMBL2331779	0	1	0	TRUE	0	0	1	TRUE	0	0	0		1	0	0	TRUE	0	0	0		Inconclusive
CHEMBL2331780	0	1	0	TRUE	0	0	1	TRUE	0	0	0		1	0	0	TRUE	0	0	0		Inconclusive
CHEMBL2331781	1	0	0	TRUE	1	0	0	TRUE	0	0	0		1	0	0	TRUE	0	0	0		Active
CHEMBL2331782	1	0	0	TRUE	1	0	0	TRUE	0	0	0		1	0	0	TRUE	0	0	0		Active
CHEMBL2331783	1	0	0	TRUE	1	0	0	TRUE	0	0	0		1	0	0	TRUE	0	0	0		Active
CHEMBL2331784	0	0	0		1	0	0	TRUE	0	0	0		1	0	0	TRUE	0	0	0		Inconclusive
CHEMBL2331785	1	0	0	TRUE	1	0	0	TRUE	0	0	0		1	0	0	TRUE	0	0	0		Active
CHEMBL2331786	1	0	0	TRUE	1	0	0	TRUE	0	0	0		1	0	0	TRUE	0	0	0		Active
CHEMBL2331787	1	0	0	TRUE	1	0	0	TRUE	0	0	0		1	0	0	TRUE	0	0	0		Active
CHEMBL2332887	0	0	0		0	0	0		0	1	0	TRUE	0	0	0		0	0	0		Inactive
CHEMBL2336643	0	0	0		0	0	0		1	0	0	TRUE	0	0	0		0	0	0		Inconclusive
CHEMBL2336644	0	0	0		0	0	0		1	0	0	TRUE	0	0	0		0	0	0		Inconclusive
CHEMBL2337126	1	0	0	TRUE	1	0	0	TRUE	0	0	0		1	0	0	TRUE	0	0	0		Active
CHEMBL2337127	1	0	0	TRUE	2	0	0	TRUE	0	0	0		1	0	0	TRUE	0	0	0		Active
CHEMBL2337128	1	0	0	TRUE	0	0	0		0	0	0		0	0	0		0	0	0		Inconclusive
CHEMBL233785	1	0	0	TRUE	1	0	0	TRUE	0	0	0		0	0	0		0	0	0		Active
CHEMBL2338472	1	0	0	TRUE	1	0	0	TRUE	0	0	0		1	0	0	TRUE	0	0	0		Active
CHEMBL2338474	1	0	0	TRUE	1	0	0	TRUE	0	0	0		1	0	0	TRUE	0	0	0		Active
CHEMBL2338475	1	0	0	TRUE	1	0	0	TRUE	0	0	0		1	0	0	TRUE	0	0	0		Active
CHEMBL2338476	1	0	0	TRUE	1	0	0	TRUE	0	0	0		1	0	0	TRUE	0	0	0		Active
CHEMBL2338477	1	0	0	TRUE	1	0	0	TRUE	0	0	0		1	0	0	TRUE	0	0	0		Active
CHEMBL2338478	1	0	0	TRUE	1	0	0	TRUE	0	0	0		1	0	0	TRUE	0	0	0		Active
CHEMBL2338479	1	0	0	TRUE	1	0	0	TRUE	0	0	0		1	0	0	TRUE	0	0	0		Active
CHEMBL2338480	1	0	0	TRUE	1	0	0	TRUE	0	0	0		1	0	0	TRUE	0	0	0		Active
CHEMBL2338481	1	0	0	TRUE	1	0	0	TRUE	0	0	0		1	0	0	TRUE	0	0	0		Active
CHEMBL2338482	1	0	0	TRUE	1	0	0	TRUE	0	0	0		1	0	0	TRUE	0	0	0		Active
CHEMBL2338483	1	0	0	TRUE	1	0	0	TRUE	0	0	0		1	0	0	TRUE	0	0	0		Active
CHEMBL2338484	1	0	0	TRUE	1	0	0	TRUE	0	0	0		1	0	0	TRUE	0	0	0		Active
CHEMBL2338485	1	0	0	TRUE	1	0	0	TRUE	0	0	0		1	0	0	TRUE	0	0	0		Active
CHEMBL2338486	1	0	0	TRUE	1	0	0	TRUE	0	0	0		1	0	0	TRUE	0	0	0		Active
CHEMBL2338487	0	1	0	TRUE	0	0	1	TRUE	0	0	0		1	0	0	TRUE	0	0	0		Inconclusive
CHEMBL2338488	0	1	0	TRUE	0	0	1	TRUE	0	0	0		1	0	0	TRUE	0	0	0		Inconclusive
CHEMBL234057	1	0	0	TRUE	0	0	0		0	1	0	TRUE	0	0	0		0	0	0		Inconclusive
CHEMBL234269	1	0	0	TRUE	0	0	0		0	1	0	TRUE	0	0	0		0	0	0		Inconclusive
CHEMBL234484	0	0	1	TRUE	0	0	0		0	0	0		0	0	0		0	0	0		Inconclusive
CHEMBL234485	0	0	1	TRUE	0	0	0		0	0	0		0	0	0		0	0	0		Inconclusive
CHEMBL234689	0	0	1	TRUE	0	0	0		0	0	0		0	0	0		0	0	0		Inconclusive
CHEMBL234691	1	0	0	TRUE	1	0	0	TRUE	0	0	0		0	0	0		0	0	0		Active
CHEMBL234692	1	0	0	TRUE	1	0	0	TRUE	0	0	0		0	0	0		0	0	0		Active
CHEMBL234693	0	0	1	TRUE	0	0	0		0	0	0		0	0	0		0	0	0		Inconclusive
CHEMBL234819	1	0	0	TRUE	1	0	0	TRUE	0	0	0		0	0	0		0	0	0		Active
CHEMBL234820	1	0	0	TRUE	1	0	0	TRUE	0	0	0		0	0	0		0	0	0		Active
CHEMBL234834	0	0	1	TRUE	0	0	0		0	1	0	TRUE	0	0	0		0	0	0		Inconclusive
CHEMBL234858	1	0	0	TRUE	1	0	0	TRUE	0	0	0		0	0	0		0	0	0		Active
CHEMBL234859	1	0	0	TRUE	1	0	0	TRUE	0	0	0		0	0	0		0	0	0		Active
CHEMBL234903	0	0	1	TRUE	0	0	0		0	0	0		0	0	0		0	0	0		Inconclusive
CHEMBL234904	0	0	1	TRUE	0	0	0		0	0	0		0	0	0		0	0	0		Inconclusive
CHEMBL234905	0	0	1	TRUE	0	0	0		0	0	0		0	0	0		0	0	0		Inconclusive
CHEMBL234906	1	0	0	TRUE	1	0	0	TRUE	0	0	0		0	0	0		0	0	0		Active
CHEMBL234907	1	0	0	TRUE	1	0	0	TRUE	0	0	0		0	0	0		0	0	0		Active
CHEMBL234908	1	0	0	TRUE	1	0	0	TRUE	0	0	0		0	0	0		0	0	0		Active
CHEMBL234909	0	0	0		1	0	0	TRUE	0	0	0		0	0	0		0	0	0		Inconclusive
CHEMBL235143	0	0	0		1	0	0	TRUE	0	0	0		1	0	0	TRUE	0	0	0		Inconclusive
CHEMBL236218	0	0	0		1	0	0	TRUE	0	0	0		1	0	0	TRUE	0	0	0		Inconclusive
CHEMBL236664	0	0	0		1	0	0	TRUE	0	0	0		1	0	0	TRUE	0	0	0		Inconclusive
CHEMBL23670	0	0	0		1	0	0	TRUE	0	0	0		2	0	0	TRUE	0	0	0		Inconclusive
CHEMBL236875	0	0	0		1	0	0	TRUE	0	0	0		1	0	0	TRUE	0	0	0		Inconclusive
CHEMBL236876	0	0	0		1	0	0	TRUE	0	0	0		1	0	0	TRUE	0	0	0		Inconclusive
CHEMBL236877	0	0	0		1	0	0	TRUE	0	0	0		1	0	0	TRUE	0	0	0		Inconclusive
CHEMBL237084	0	0	0		1	0	0	TRUE	0	0	0		1	0	0	TRUE	0	0	0		Inconclusive
CHEMBL237085	0	0	0		1	0	0	TRUE	0	0	0		1	0	0	TRUE	0	0	0		Inconclusive
CHEMBL237086	0	0	0		1	0	0	TRUE	0	0	0		1	0	0	TRUE	0	0	0		Inconclusive
CHEMBL237277	0	0	0		1	0	0	TRUE	0	0	0		1	0	0	TRUE	0	0	0		Inconclusive
CHEMBL237305	0	0	0		1	0	0	TRUE	0	0	0		1	0	0	TRUE	0	0	0		Inconclusive
CHEMBL237306	0	0	0		1	0	0	TRUE	0	0	0		1	0	0	TRUE	0	0	0		Inconclusive
CHEMBL237307	0	0	0		1	0	0	TRUE	0	0	0		1	0	0	TRUE	0	0	0		Inconclusive
CHEMBL237484	0	0	0		1	0	0	TRUE	0	0	0		1	0	0	TRUE	0	0	0		Inconclusive
CHEMBL237485	0	0	0		1	0	0	TRUE	0	0	0		1	0	0	TRUE	0	0	0		Inconclusive
CHEMBL237518	0	0	0		1	0	0	TRUE	0	0	0		1	0	0	TRUE	0	0	0		Inconclusive
CHEMBL237519	0	0	0		1	0	0	TRUE	0	0	0		1	0	0	TRUE	0	0	0		Inconclusive
CHEMBL237520	0	0	0		1	0	0	TRUE	0	0	0		1	0	0	TRUE	0	0	0		Inconclusive
CHEMBL2375946	0	0	0		1	0	0	TRUE	0	0	0		0	0	0		0	0	0		Inconclusive
CHEMBL2375947	0	0	0		1	0	0	TRUE	0	0	0		0	0	0		0	0	0		Inconclusive
CHEMBL2375948	0	0	0		1	0	0	TRUE	0	0	0		0	0	0		0	0	0		Inconclusive
CHEMBL2375949	0	0	0		1	0	0	TRUE	0	0	0		0	0	0		0	0	0		Inconclusive
CHEMBL2375950	0	0	0		1	0	0	TRUE	0	0	0		0	0	0		0	0	0		Inconclusive
CHEMBL2375951	0	0	0		1	0	0	TRUE	0	0	0		0	0	0		0	0	0		Inconclusive
CHEMBL2375952	0	0	0		1	0	0	TRUE	0	0	0		0	0	0		0	0	0		Inconclusive
CHEMBL237710	0	0	0		1	0	0	TRUE	0	0	0		1	0	0	TRUE	0	0	0		Inconclusive
CHEMBL237730	0	0	0		1	0	0	TRUE	0	0	0		1	0	0	TRUE	0	0	0		Inconclusive
CHEMBL2377521	1	0	0	TRUE	1	0	0	TRUE	0	0	0		0	0	0		0	0	0		Active
CHEMBL2377522	1	0	0	TRUE	1	0	0	TRUE	0	0	0		0	0	0		0	0	0		Active
CHEMBL2377523	1	0	0	TRUE	1	0	0	TRUE	0	0	0		0	0	0		0	0	0		Active
CHEMBL2377524	1	0	0	TRUE	1	0	0	TRUE	0	0	0		0	0	0		0	0	0		Active
CHEMBL2377525	1	0	0	TRUE	1	0	0	TRUE	0	0	0		0	0	0		0	0	0		Active
CHEMBL2377526	1	0	0	TRUE	1	0	0	TRUE	0	0	0		0	0	0		0	0	0		Active
CHEMBL2377527	1	0	0	TRUE	1	0	0	TRUE	0	0	0		0	0	0		0	0	0		Active
CHEMBL2377528	1	0	0	TRUE	1	0	0	TRUE	0	0	0		0	0	0		0	0	0		Active
CHEMBL2377529	1	0	0	TRUE	1	0	0	TRUE	0	0	0		0	0	0		0	0	0		Active
CHEMBL2377530	1	0	0	TRUE	1	0	0	TRUE	0	0	0		0	0	0		0	0	0		Active
CHEMBL2377531	1	0	0	TRUE	1	0	0	TRUE	0	0	0		0	0	0		0	0	0		Active
CHEMBL2377532	1	0	0	TRUE	1	0	0	TRUE	0	0	0		0	0	0		0	0	0		Active
CHEMBL238152	0	0	0		1	0	0	TRUE	0	0	0		1	0	0	TRUE	0	0	0		Inconclusive
CHEMBL2381848	0	0	0		0	0	0		0	1	0	TRUE	0	0	0		0	0	0		Inactive
CHEMBL2382279	0	0	0		0	0	0		1	0	0	TRUE	0	0	0		0	0	0		Inconclusive
CHEMBL2382280	0	0	0		0	0	0		1	0	0	TRUE	0	0	0		0	0	0		Inconclusive
CHEMBL2382281	0	0	0		0	0	0		1	0	0	TRUE	0	0	0		0	0	0		Inconclusive
CHEMBL238357	0	0	0		1	0	0	TRUE	0	0	0		1	0	0	TRUE	0	0	0		Inconclusive
CHEMBL23874	0	0	0		1	0	0	TRUE	0	0	0		1	0	0	TRUE	0	0	0		Inconclusive
CHEMBL23881	0	0	0		1	0	0	TRUE	0	0	0		2	0	0	TRUE	0	0	0		Inconclusive
CHEMBL238970	0	0	0		1	0	0	TRUE	0	0	0		1	0	0	TRUE	0	0	0		Inconclusive
CHEMBL239156	2	0	0	TRUE	0	0	0		0	0	0		0	0	0		0	0	0		Inconclusive
CHEMBL2397733	0	0	0		0	0	0		0	1	0	TRUE	0	0	0		0	0	0		Inactive
CHEMBL2401756	1	0	0	TRUE	0	0	0		0	0	0		0	0	0		0	0	0		Inconclusive
CHEMBL2403497	1	0	0	TRUE	0	0	0		0	0	0		0	0	0		0	0	0		Inconclusive
CHEMBL2403498	1	0	0	TRUE	0	0	0		0	0	0		0	0	0		0	0	0		Inconclusive
CHEMBL2403499	1	0	0	TRUE	0	0	0		0	0	0		0	0	1	TRUE	0	0	0		Inconclusive
CHEMBL2403500	1	0	0	TRUE	0	0	0		0	0	0		0	0	0		0	0	0		Inconclusive
CHEMBL2403501	1	0	0	TRUE	0	0	0		0	0	0		0	0	1	TRUE	0	0	0		Inconclusive
CHEMBL2403502	0	0	1	TRUE	0	0	0		0	0	0		0	0	0		0	0	0		Inconclusive
CHEMBL2403503	1	0	0	TRUE	0	0	0		0	0	0		0	0	0		0	0	0		Inconclusive
CHEMBL2403504	1	0	0	TRUE	0	0	0		0	0	0		0	0	0		0	0	0		Inconclusive
CHEMBL2403505	1	0	0	TRUE	0	0	0		0	0	0		0	0	0		0	0	0		Inconclusive
CHEMBL2403506	1	0	0	TRUE	0	0	0		0	0	0		0	0	0		0	0	0		Inconclusive
CHEMBL2403507	1	0	0	TRUE	0	0	0		0	0	0		0	0	0		0	0	0		Inconclusive
CHEMBL2403508	0	0	1	TRUE	0	0	0		0	0	0		0	0	0		0	0	0		Inconclusive
CHEMBL2403509	1	0	0	TRUE	0	0	0		0	0	0		0	0	1	TRUE	0	0	0		Inconclusive
CHEMBL2403510	1	0	0	TRUE	0	0	0		0	0	0		0	0	0		0	0	0		Inconclusive
CHEMBL2403511	1	0	0	TRUE	0	0	0		0	0	0		0	0	0		0	0	0		Inconclusive
CHEMBL2403512	1	0	0	TRUE	0	0	0		0	0	0		0	0	0		0	0	0		Inconclusive
CHEMBL2403513	1	0	0	TRUE	0	0	0		0	0	0		0	0	0		0	0	0		Inconclusive
CHEMBL24038	4	1	0	FALSE	8	0	0	TRUE	0	0	0		2	0	0	TRUE	0	0	0		Inconclusive
CHEMBL241078	0	0	0		1	0	0	TRUE	0	0	0		1	0	0	TRUE	0	0	0		Inconclusive
CHEMBL241286	0	0	0		1	0	0	TRUE	0	0	0		1	0	0	TRUE	0	0	0		Inconclusive
CHEMBL241298	0	0	0		1	0	0	TRUE	0	0	0		1	0	0	TRUE	0	0	0		Inconclusive
CHEMBL241299	0	0	0		1	0	0	TRUE	0	0	0		1	0	0	TRUE	0	0	0		Inconclusive
CHEMBL241471	0	0	0		1	0	0	TRUE	0	0	0		1	0	0	TRUE	0	0	0		Inconclusive
CHEMBL241472	0	0	0		1	0	0	TRUE	0	0	0		1	0	0	TRUE	0	0	0		Inconclusive
CHEMBL241478	0	0	0		1	0	0	TRUE	0	0	0		1	0	0	TRUE	0	0	0		Inconclusive
CHEMBL241479	0	0	0		1	0	0	TRUE	0	0	0		1	0	0	TRUE	0	0	0		Inconclusive
CHEMBL242007	0	0	0		2	0	0	TRUE	0	0	0		0	0	0		0	0	0		Inconclusive
CHEMBL242341	2	0	0	TRUE	0	0	0		0	0	0		0	0	0		0	1	0	TRUE	Inconclusive
CHEMBL2424946	1	0	0	TRUE	0	0	0		0	0	0		0	0	0		0	0	0		Inconclusive
CHEMBL2424947	1	0	0	TRUE	0	0	0		0	0	0		0	0	0		0	0	0		Inconclusive
CHEMBL2424948	1	0	0	TRUE	0	0	0		0	0	0		0	0	0		0	0	0		Inconclusive
CHEMBL2424949	1	0	0	TRUE	0	0	0		0	0	0		0	0	0		0	0	0		Inconclusive
CHEMBL2424950	1	0	0	TRUE	0	0	0		0	0	0		0	0	0		0	0	0		Inconclusive
CHEMBL2424951	1	0	0	TRUE	0	0	0		0	0	0		0	0	0		0	0	0		Inconclusive
CHEMBL2424952	1	0	0	TRUE	0	0	0		0	0	0		0	0	0		0	0	0		Inconclusive
CHEMBL2424953	1	0	0	TRUE	0	0	0		0	0	0		0	0	0		0	0	0		Inconclusive
CHEMBL2424954	1	0	0	TRUE	0	0	0		0	0	0		0	0	0		0	0	0		Inconclusive
CHEMBL2424955	1	0	0	TRUE	0	0	0		0	0	0		0	0	0		0	0	0		Inconclusive
CHEMBL2424956	1	0	0	TRUE	0	0	0		0	0	0		0	0	0		0	0	0		Inconclusive
CHEMBL2430002	0	1	0	TRUE	0	0	0		0	0	0		0	0	0		0	0	0		Inactive
CHEMBL2430017	0	1	0	TRUE	0	0	0		0	0	0		0	0	0		0	0	0		Inactive
CHEMBL243664	2	0	0	TRUE	0	0	0		0	0	0		0	0	0		0	0	0		Inconclusive
CHEMBL244573	0	0	0		1	0	0	TRUE	0	0	0		0	0	0		0	0	0		Inconclusive
CHEMBL244574	2	0	0	TRUE	2	0	0	TRUE	0	0	0		0	0	0		0	0	0		Active
CHEMBL244575	0	0	0		2	0	0	TRUE	0	0	0		0	0	0		0	0	0		Inconclusive
CHEMBL24458	1	0	0	TRUE	7	0	0	TRUE	0	0	0		5	0	0	TRUE	0	0	0		Active
CHEMBL244786	0	0	0		1	0	0	TRUE	0	0	0		0	0	0		0	0	0		Inconclusive
CHEMBL245454	1	0	0	TRUE	1	0	0	TRUE	0	0	0		0	0	0		0	0	0		Active
CHEMBL245464	0	0	0		1	0	0	TRUE	0	0	0		0	0	0		0	0	0		Inconclusive
CHEMBL245465	0	0	0		1	0	0	TRUE	0	0	0		0	0	0		0	0	0		Inconclusive
CHEMBL245656	1	0	0	TRUE	1	0	0	TRUE	0	0	0		1	0	0	TRUE	0	0	0		Active
CHEMBL245664	0	0	0		1	0	0	TRUE	0	0	0		0	0	0		0	0	0		Inconclusive
CHEMBL245674	1	0	0	TRUE	1	0	0	TRUE	0	0	0		1	0	0	TRUE	0	0	0		Active
CHEMBL245865	0	0	0		1	0	0	TRUE	0	0	0		0	0	0		0	0	0		Inconclusive
CHEMBL245866	0	0	0		1	0	0	TRUE	0	0	0		0	0	0		0	0	0		Inconclusive
CHEMBL246069	0	0	0		1	0	0	TRUE	0	0	0		0	0	0		0	0	0		Inconclusive
CHEMBL246070	0	0	0		1	0	0	TRUE	0	0	0		0	0	0		0	0	0		Inconclusive
CHEMBL246270	1	0	0	TRUE	1	0	0	TRUE	0	0	0		1	0	0	TRUE	0	0	0		Active
CHEMBL246272	1	0	0	TRUE	1	0	0	TRUE	0	0	0		1	0	0	TRUE	0	0	0		Active
CHEMBL246279	1	0	0	TRUE	1	0	0	TRUE	0	0	0		0	0	0		0	0	0		Active
CHEMBL246281	0	0	0		1	0	0	TRUE	0	0	0		0	0	0		0	0	0		Inconclusive
CHEMBL246282	0	0	0		1	0	0	TRUE	0	0	0		0	0	0		0	0	0		Inconclusive
CHEMBL246473	1	0	0	TRUE	1	0	0	TRUE	0	0	0		1	0	0	TRUE	0	0	0		Active
CHEMBL246485	1	0	0	TRUE	1	0	0	TRUE	0	0	0		0	0	0		0	0	0		Active
CHEMBL246486	1	0	0	TRUE	1	0	0	TRUE	0	0	0		0	0	0		0	0	0		Active
CHEMBL246510	0	0	0		1	0	0	TRUE	0	0	0		0	0	0		0	0	0		Inconclusive
CHEMBL247110	1	0	0	TRUE	1	0	0	TRUE	0	0	0		0	0	0		0	0	0		Active
CHEMBL247111	1	0	0	TRUE	1	0	0	TRUE	0	0	0		0	0	0		0	0	0		Active
CHEMBL247314	1	0	0	TRUE	1	0	0	TRUE	0	0	0		0	0	0		0	0	0		Active
CHEMBL247507	0	0	0		1	0	0	TRUE	0	0	0		0	0	0		0	0	0		Inconclusive
CHEMBL247508	0	0	0		1	0	0	TRUE	0	0	0		0	0	0		0	0	0		Inconclusive
CHEMBL247719	1	0	0	TRUE	1	0	0	TRUE	0	0	0		0	0	0		0	1	0	TRUE	Inconclusive
CHEMBL247720	1	0	0	TRUE	1	0	0	TRUE	0	0	0		1	0	0	TRUE	0	0	0		Active
CHEMBL247748	0	0	0		1	0	0	TRUE	0	0	0		0	0	0		0	0	0		Inconclusive
CHEMBL247749	0	0	0		1	0	0	TRUE	0	0	0		0	0	0		0	0	0		Inconclusive
CHEMBL247917	0	0	0		0	0	0		0	1	0	TRUE	0	0	0		0	0	0		Inactive
CHEMBL247918	0	0	0		0	0	0		0	1	0	TRUE	0	0	0		0	0	0		Inactive
CHEMBL247919	0	0	0		1	0	0	TRUE	0	0	0		0	0	0		0	0	0		Inconclusive
CHEMBL247925	1	0	0	TRUE	1	0	0	TRUE	0	0	0		1	0	0	TRUE	0	0	0		Active
CHEMBL247926	1	0	0	TRUE	1	0	0	TRUE	0	0	0		1	0	0	TRUE	0	0	0		Active
CHEMBL247937	1	0	0	TRUE	1	0	0	TRUE	0	0	0		0	0	0		0	0	0		Active
CHEMBL247951	0	0	0		2	0	0	TRUE	0	0	0		0	0	0		0	0	0		Inconclusive
CHEMBL247952	0	0	0		1	0	0	TRUE	0	0	0		0	0	0		0	0	0		Inconclusive
CHEMBL248112	1	0	0	TRUE	1	0	0	TRUE	0	0	0		0	0	0		0	0	0		Active
CHEMBL248113	1	0	0	TRUE	1	0	0	TRUE	0	0	0		0	0	0		0	0	0		Active
CHEMBL248117	0	0	0		1	0	0	TRUE	0	0	0		0	0	0		0	0	0		Inconclusive
CHEMBL248118	0	0	0		1	0	0	TRUE	0	0	0		0	0	0		0	0	0		Inconclusive
CHEMBL248318	1	0	0	TRUE	1	0	0	TRUE	0	0	0		0	0	0		0	0	0		Active
CHEMBL248324	0	0	0		1	0	0	TRUE	0	0	0		0	0	0		0	0	0		Inconclusive
CHEMBL248325	0	0	0		1	0	0	TRUE	0	0	0		0	0	0		0	0	0		Inconclusive
CHEMBL248326	0	0	0		1	0	0	TRUE	0	0	0		0	0	0		0	0	0		Inconclusive
CHEMBL248526	0	0	0		1	0	0	TRUE	0	0	0		0	0	0		0	0	0		Inconclusive
CHEMBL248527	0	0	0		1	0	0	TRUE	0	0	0		0	0	0		0	0	0		Inconclusive
CHEMBL248530	1	0	0	TRUE	1	0	0	TRUE	0	0	0		1	0	0	TRUE	0	0	0		Active
CHEMBL248660	0	0	0		1	0	0	TRUE	0	0	0		0	0	0		0	0	0		Inconclusive
CHEMBL248663	0	0	0		1	0	0	TRUE	0	0	0		0	0	0		0	0	0		Inconclusive
CHEMBL248848	0	0	0		1	0	0	TRUE	0	0	0		0	0	0		0	0	0		Inconclusive
CHEMBL248850	0	0	0		1	0	0	TRUE	0	0	0		0	0	0		0	0	0		Inconclusive
CHEMBL248906	3	0	0	TRUE	3	0	0	TRUE	0	0	0		3	0	0	TRUE	0	0	0		Active
CHEMBL249045	0	0	0		1	0	0	TRUE	0	0	0		0	0	0		0	0	0		Inconclusive
CHEMBL249225	0	0	0		1	0	0	TRUE	0	0	0		0	0	0		0	0	0		Inconclusive
CHEMBL249239	0	0	0		1	0	0	TRUE	0	0	0		0	0	0		0	0	0		Inconclusive
CHEMBL249438	0	0	0		1	0	0	TRUE	0	0	0		0	0	0		0	0	0		Inconclusive
CHEMBL249439	0	0	0		1	0	0	TRUE	0	0	0		0	0	0		0	0	0		Inconclusive
CHEMBL249442	0	0	0		1	0	0	TRUE	0	0	0		0	0	0		0	0	0		Inconclusive
CHEMBL249833	0	0	0		1	0	0	TRUE	0	0	0		0	0	0		0	0	0		Inconclusive
CHEMBL249865	0	0	0		1	0	0	TRUE	0	0	0		0	0	0		0	0	0		Inconclusive
CHEMBL25	1	0	0	TRUE	0	0	0		0	0	0		0	0	0		0	0	0		Inconclusive
CHEMBL250223	0	0	0		1	0	0	TRUE	0	0	0		0	0	0		0	0	0		Inconclusive
CHEMBL250276	0	0	0		1	0	0	TRUE	0	0	0		0	0	0		0	0	0		Inconclusive
CHEMBL250277	0	0	0		1	0	0	TRUE	0	0	0		0	0	0		0	0	0		Inconclusive
CHEMBL250278	0	0	0		1	0	0	TRUE	0	0	0		0	0	0		0	0	0		Inconclusive
[truncated: 2,104 more rows]

## Sheet: Table S5
Table S5. Main parameters for initializing “RandomForestClassifier” instance
Parameter	Value
“n_estimators”	500a
“max_depth”	None
“max_features”	“sqrt”
“min_samples_split”	2
“class_weight”	Noneb
“random_state”	Specifiedc
a. 100, 200, 300, 400, 500, 700 trees (n_estimators) were tested. Adding number of trees significantly slowed down the establishment of models, but did not significantly improve the performance of the established classifiers. Finally, the n_estimators was set to 500.
b. In fact, different class_weight options were tested, as well as an self-built voter system (balancing the positive and negative samples to the ratio of 1:1), data not shown. It was found that with the AUC as metrics the balancing voter performs worst, meanwhile the classifiers with “class_weight” of None typically performs best. This observation is also consistent with report by Capuzzi et al.…
c. The specified random_state was integer randomly generated by numpy.random.randint. And all seeds were recorded for peer-reviewers to repeat our results.

## Sheet: Table S6
Table S6. Intersection-set compounds of the EHT set and the Tox21 set
Neutralized SMILES code	PUBCHEM CID	EHT activity	Tox21 activity	State of inconsistency
CN(CCOc1ccc(CC2SC(=O)NC2=O)cc1)c1ccccn1	cid77999	Active	Active	~
CCCCC(CC)COC(=O)c1ccccc1C(=O)O	cid20393	Active	Active	~
O=P(Oc1ccccc1)(Oc1ccccc1)Oc1ccccc1	cid8289	Active	Inconclusive	Minor
CCCC[Sn](Cl)(CCCC)CCCC	cid15096	Active	Active	~
CC(C)(c1cc(Cl)c(O)c(Cl)c1)c1cc(Cl)c(O)c(Cl)c1	cid6619	Active	Inconclusive	Minor
CC(C)(c1cc(Br)c(O)c(Br)c1)c1cc(Br)c(O)c(Br)c1	cid6618	Active	Inconclusive	Minor
Oc1c(Br)cc(Br)cc1Br	cid1483	Active	Inactive	Major
Brc1ccc(Oc2ccc(Br)cc2Br)c(Br)c1	cid95170	Active	Inactive	Major
CC(C)COC(=O)c1ccccc1C(=O)OCC(C)C	cid6782	Active	Inactive	Major
CCCCOC(=O)c1ccccc1C(=O)OCc1ccccc1	cid2347	Active	Inactive	Major
Cc1c(C)c2c(c(C)c1O)CCC(C)(COc1ccc(CC3SC(=O)NC3=O)cc1)O2	cid5591	Active	Active	~
c1ccc(OP(Oc2ccccc2)Oc2ccccc2)cc1	cid7540	Inconclusive	Inactive	Minor
CCCCOP(=O)(OCCCC)OCCCC	cid31357	Inconclusive	Inactive	Minor
CCCCOCCOP(=O)(OCCOCCCC)OCCOCCCC	cid6540	Inconclusive	Inactive	Minor
CC(C)CCCCCCOC(=O)c1ccccc1C(=O)OCCCCCCC(C)C	cid590836	Inconclusive	Inactive	Minor
CCCCOC(=O)c1ccccc1C(=O)OCCCC	cid3026	Inconclusive	Inactive	Minor
O=S(=O)(O)C(F)(F)C(F)(F)C(F)(F)C(F)(F)C(F)(F)C(F)(F)C(F)(F)C(F)(F)F	cid74483	Inconclusive	Inactive	Minor
CCCCC(CC)COP(=O)(Oc1ccccc1)Oc1ccccc1	cid14716	Inconclusive	Inactive	Minor
CCCCC/C=C\C/C=C\CCCCCCCC(=O)O	cid5280450	Inconclusive	Inactive	Minor
CCCC[Sn](Cl)(Cl)CCCC	cid12688	Inconclusive	Inconclusive	~
CCCCC(CC)COC(=O)CC(C(=O)OCC(CC)CCCC)S(=O)(=O)O	cid23673837	Inconclusive	Inactive	Minor
CCCCC(CC)COC(=O)c1c(Br)c(Br)c(Br)c(Br)c1C(=O)OCC(CC)CCCC	cid117291	Inactive	Inactive	~
CCCCC(CC)COC(=O)c1ccccc1C(=O)OCC(CC)CCCC	cid8343	Inactive	Inactive	~
O=P(O)(Oc1ccccc1)Oc1ccccc1	cid13282	Inactive	Inactive	~
CC(C)(c1ccc(O)cc1)c1ccc(O)cc1	cid6623	Inactive	Inconclusive	Minor
Oc1c(Cl)cc(Cl)cc1Cl	cid6914	Inactive	Inconclusive	Minor
Brc1ccc(Oc2cc(Br)c(Br)cc2Br)c(Br)c1	cid36159	Inactive	Inactive	~
Oc1cc(Cl)ccc1Oc1ccc(Cl)cc1Cl	cid5564	Inactive	Inactive	~
O=C(O)C(F)(F)C(F)(F)C(F)(F)C(F)(F)C(F)(F)C(F)(F)C(F)(F)F	cid9554	Inactive	Inactive	~
O=P(OCCCl)(OCCCl)OCCCl	cid8295	Inactive	Inactive	~
CC(CCl)OP(=O)(OC(C)CCl)OC(C)CCl	cid26176	Inactive	Inactive	~
CC1=C(/C=C/C(C)=C\C=C\C(C)=C\C(=O)O)C(C)(C)CCC1	cid449171	Inactive	Active	Major
CC1=C(/C=C/C(C)=C/C=C/C(C)=C/C(=O)O)C(C)(C)CCC1	cid444795	Inactive	Active	Major
CCCC[Sn](Cl)(Cl)Cl	cid14236	Inactive	Inactive	~
O=C(O)C(Cl)(Cl)Cl	cid6421	Inactive	Inactive	~
O=C(O)C(Cl)Cl	cid6597	Inactive	Inactive	~
CCCCC(CC)C(=O)O	cid8697	Inactive	Inactive	~
CCCCC(CC)CO	cid7720	Inactive	Inactive	~
O=C(O)COc1ccc(Cl)cc1Cl	cid1486	Inactive	Inactive	~
SMILES: simplified molecular input line entry system
